# Supplementary material
Source: publisher figshare collection journal article supplement (https://tandf.figshare.com/articles/dataset/_/7874162)

# Supplementary Material D: Synthetic MCSA data simulation results

Synthetic MCSA data: MMSE response parameters, and initial probability parameters

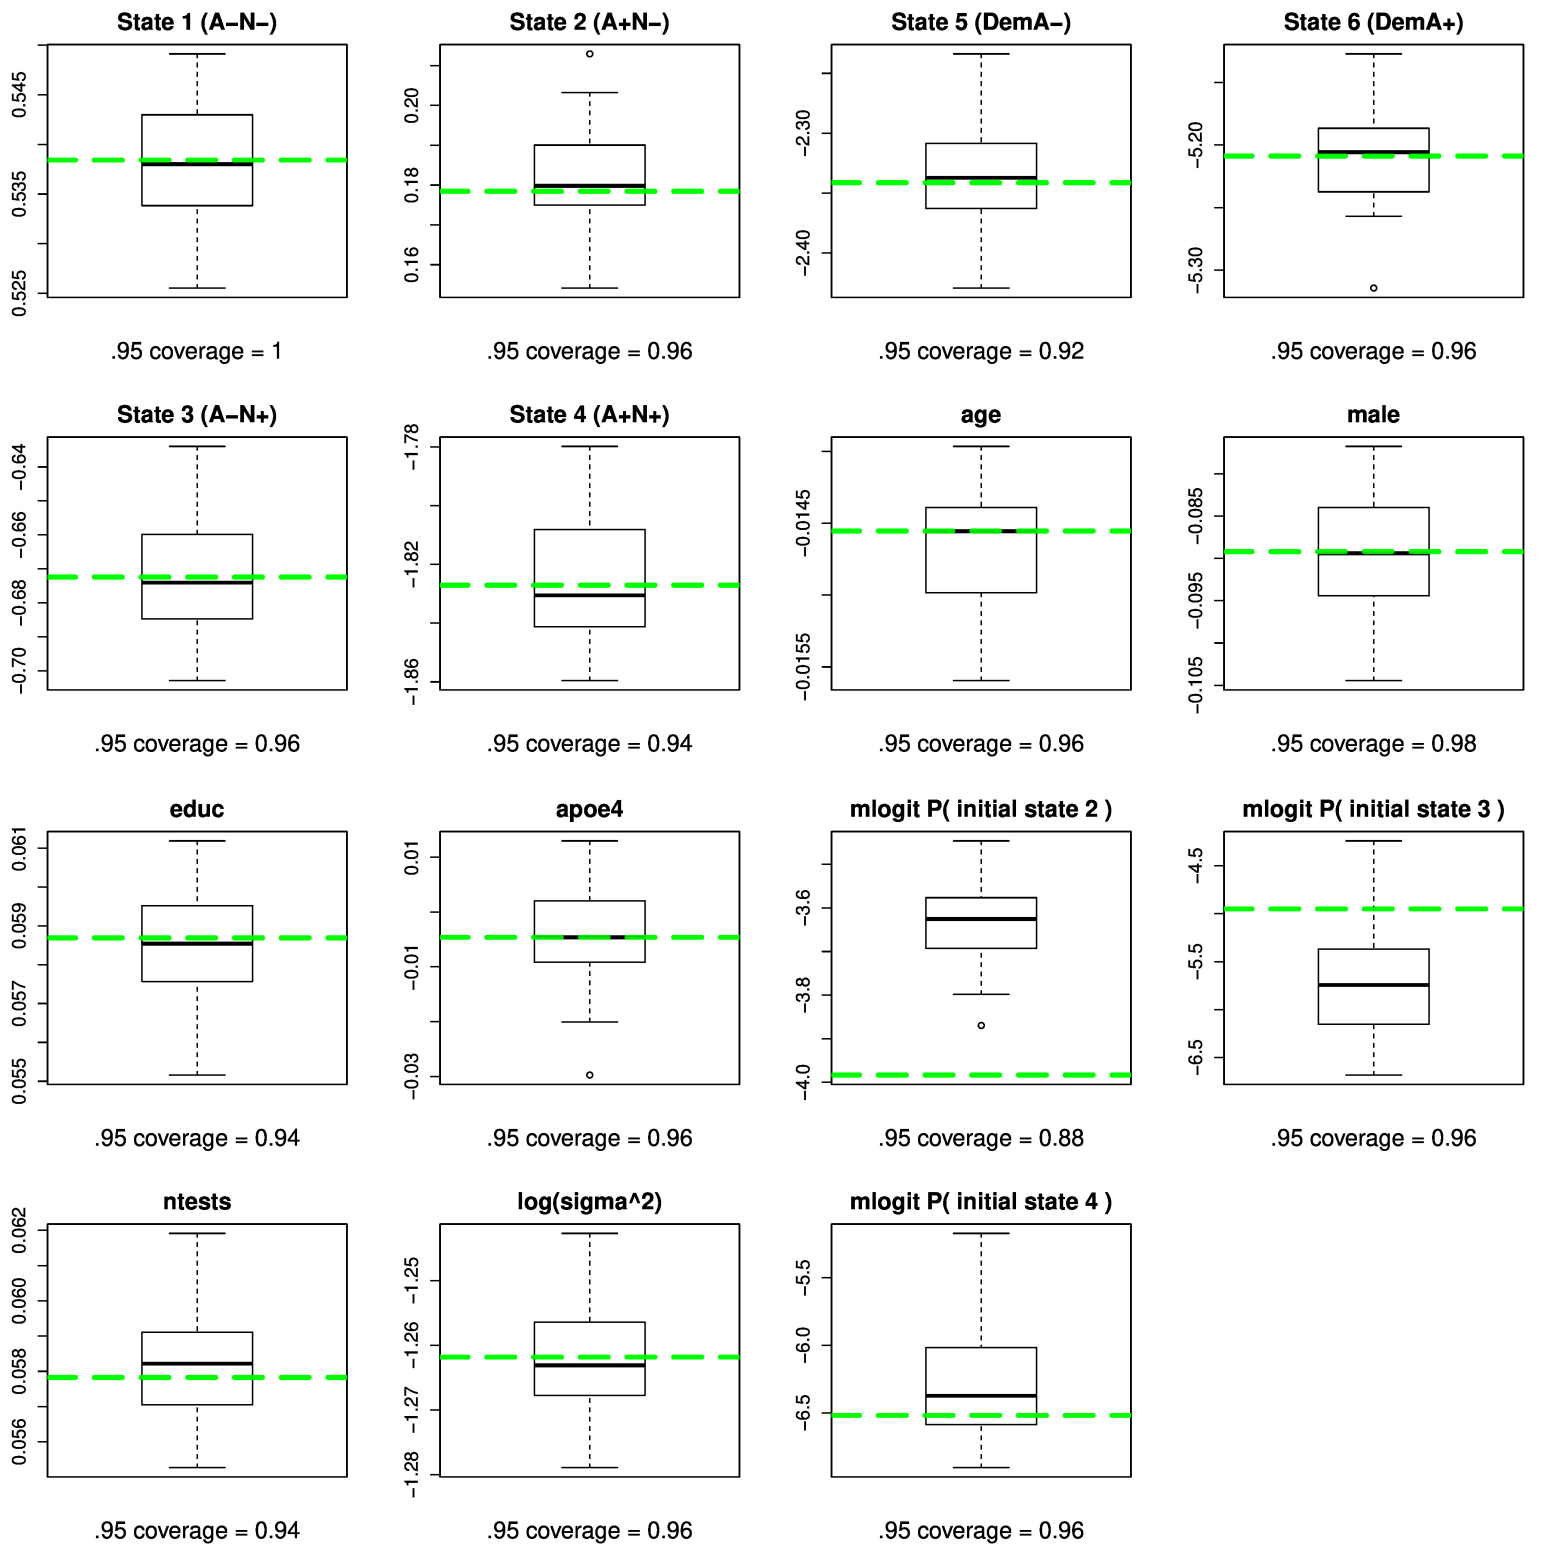

# Synthetic MCSA data: other response parameters

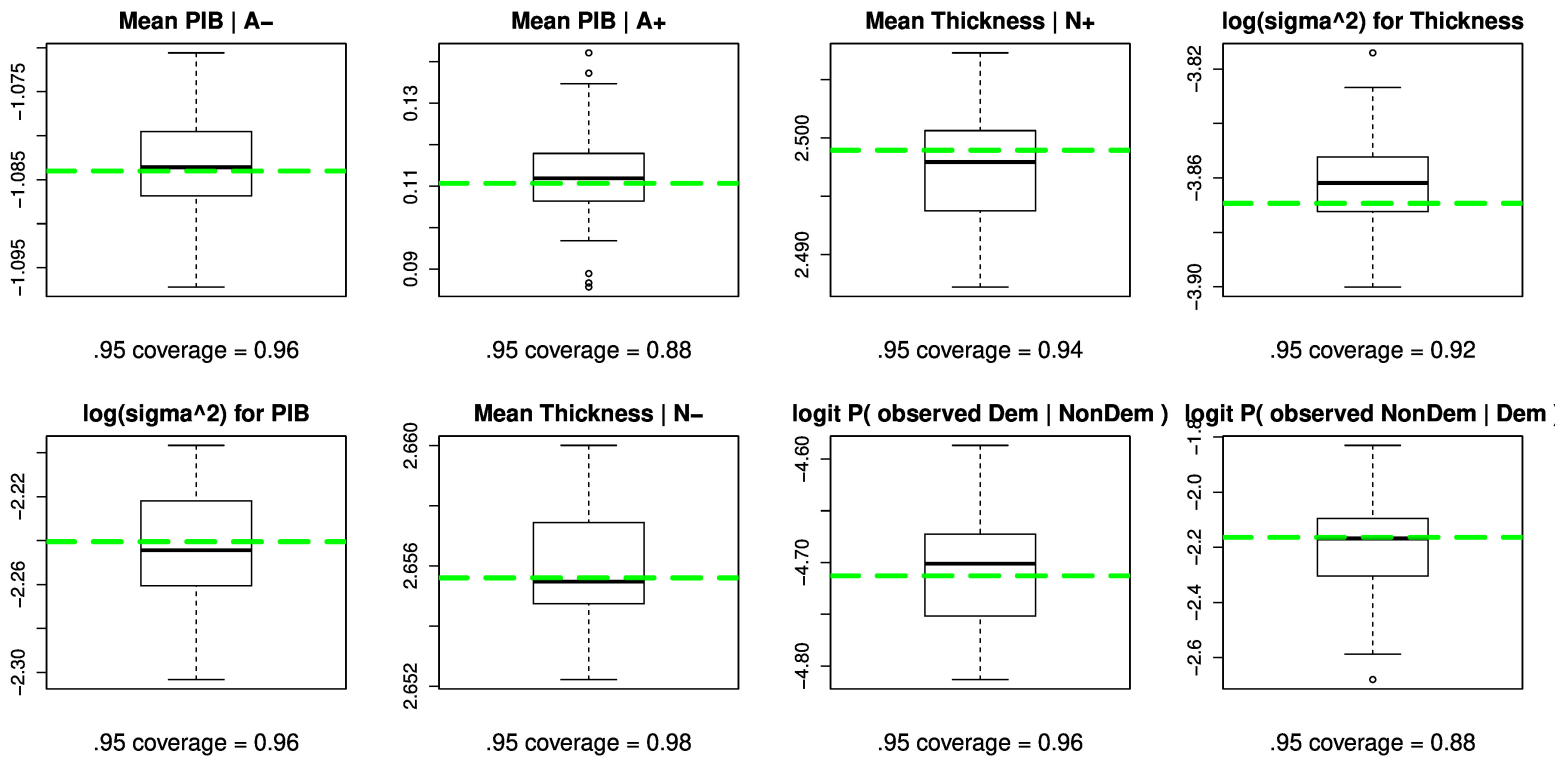

Synthetic MCSA data: log-rate intercept and death bias parameters

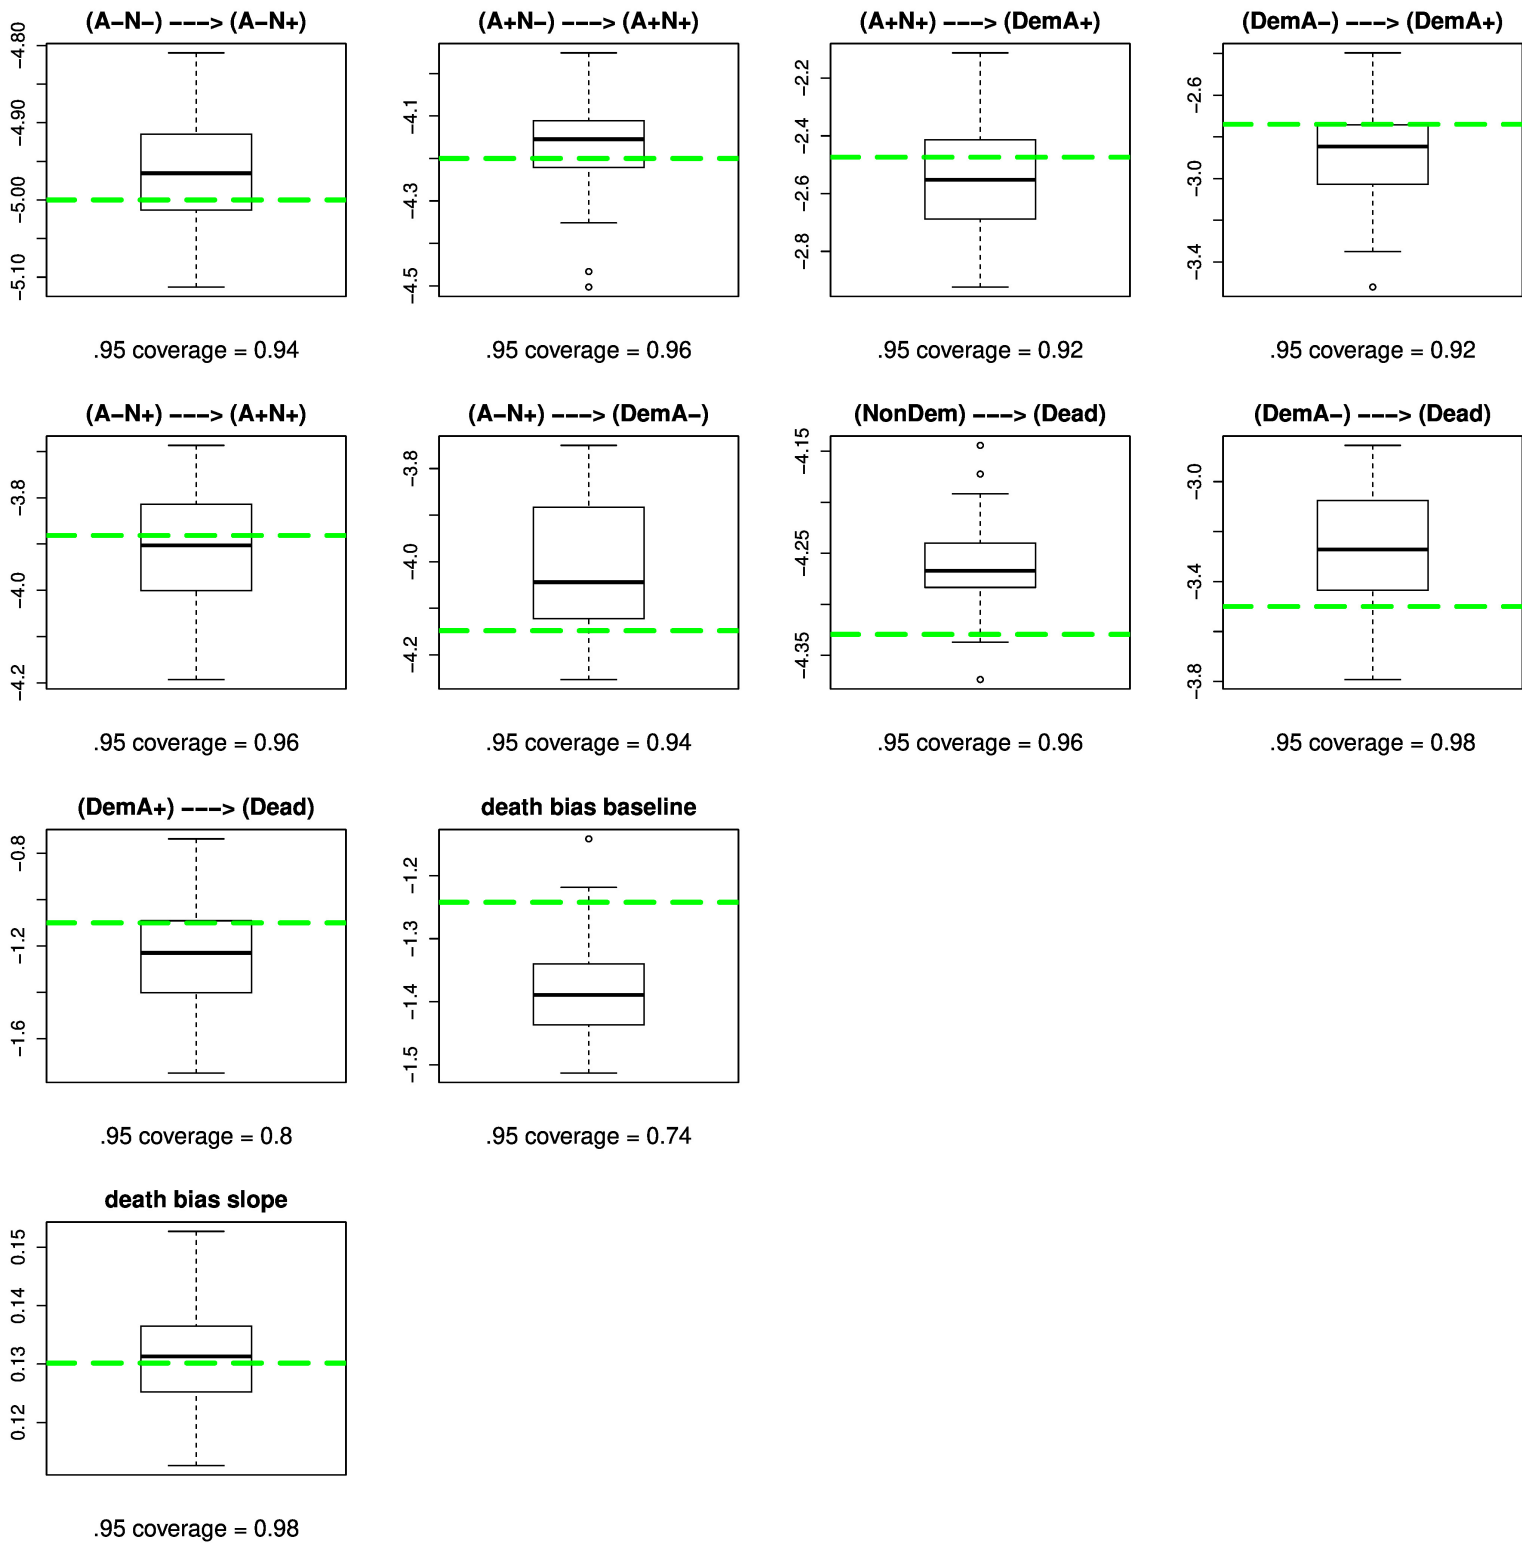

Synthetic MCSA data: log-rate iage parameters

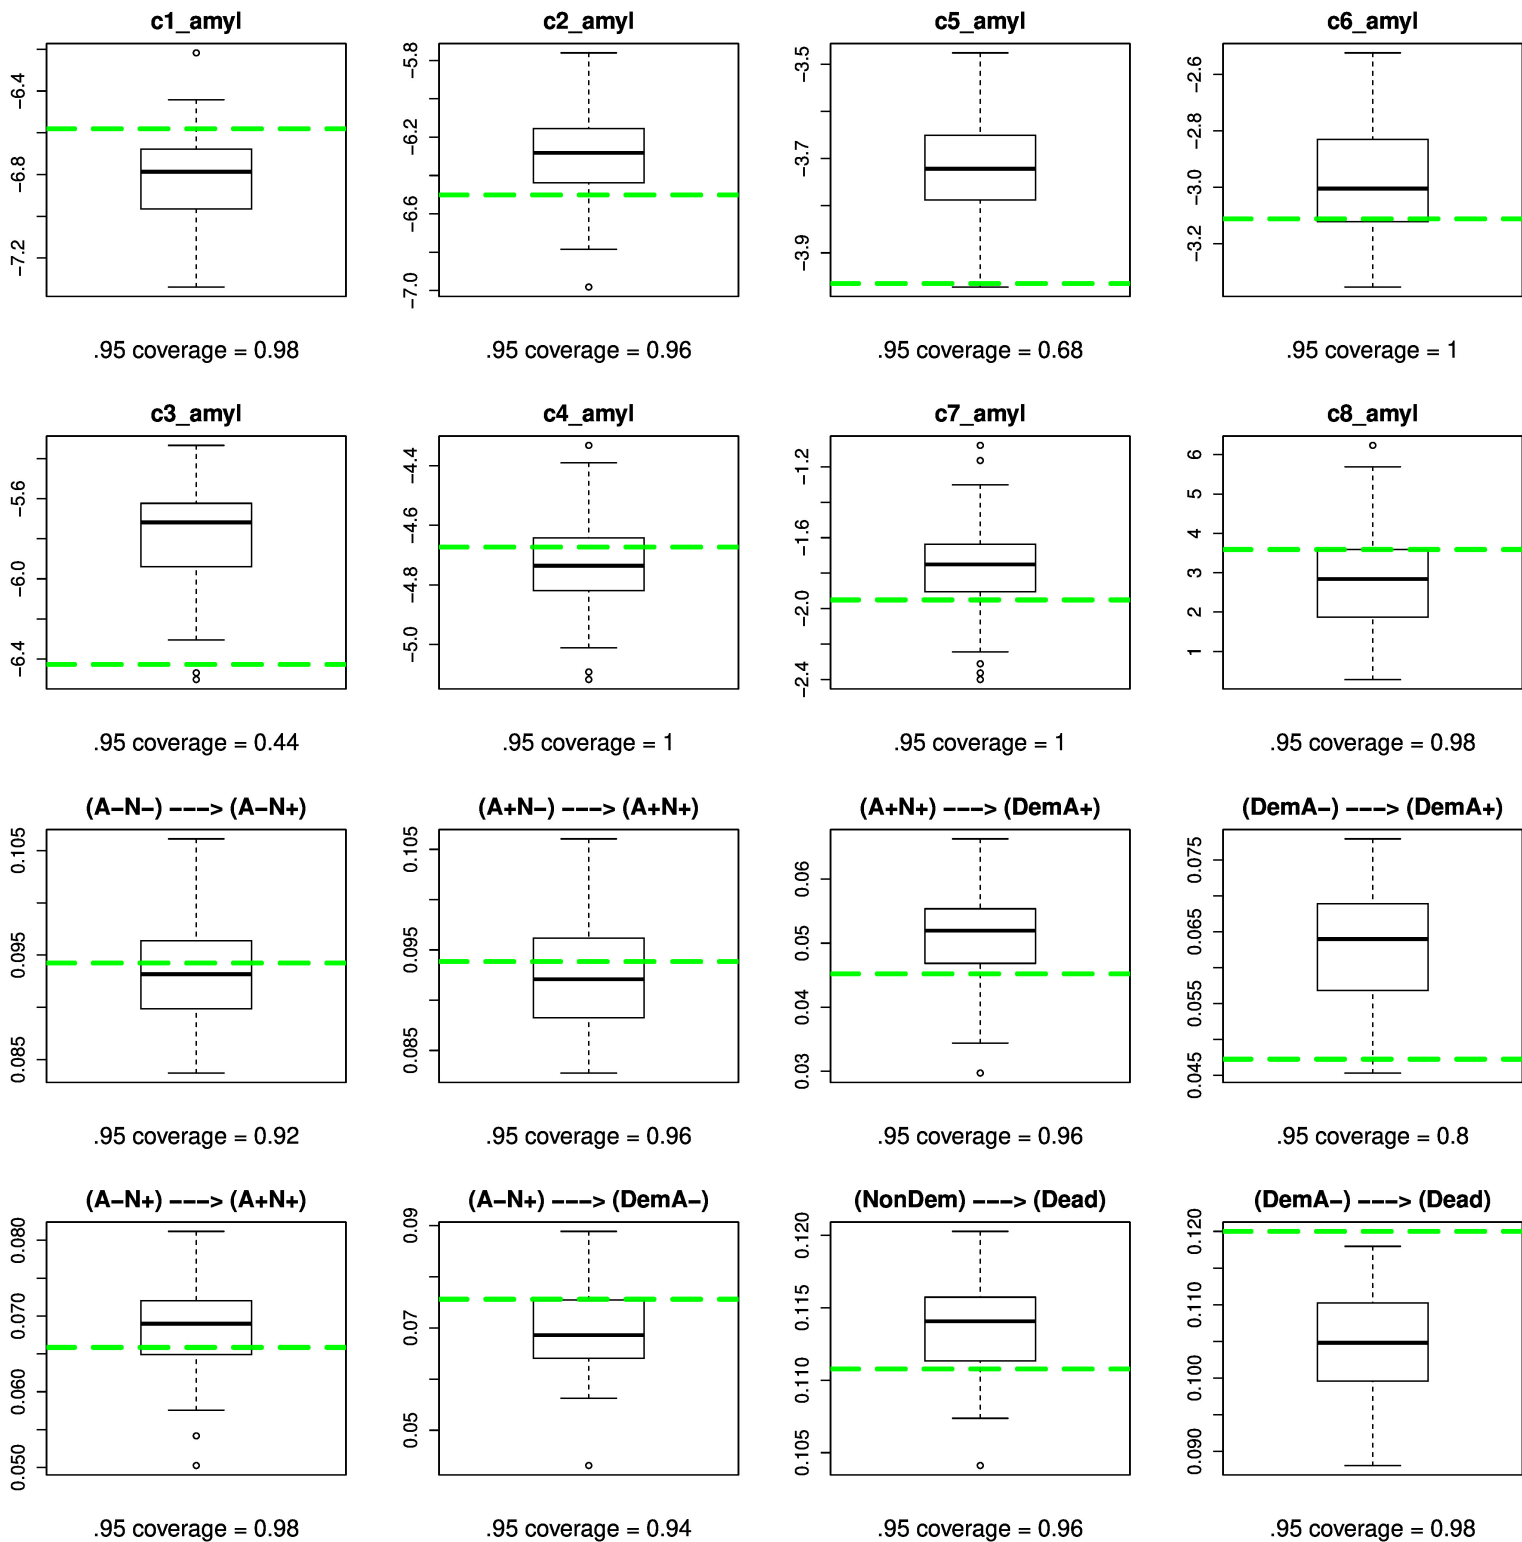



Synthetic MCSA data: log-rate iage parameters (continued)

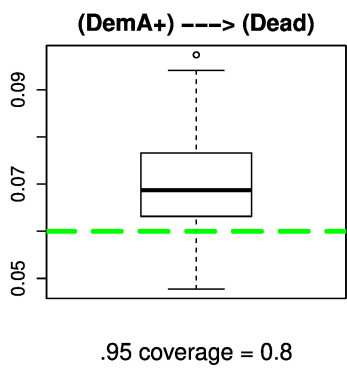

Synthetic MCSA data: log-rate male parameters

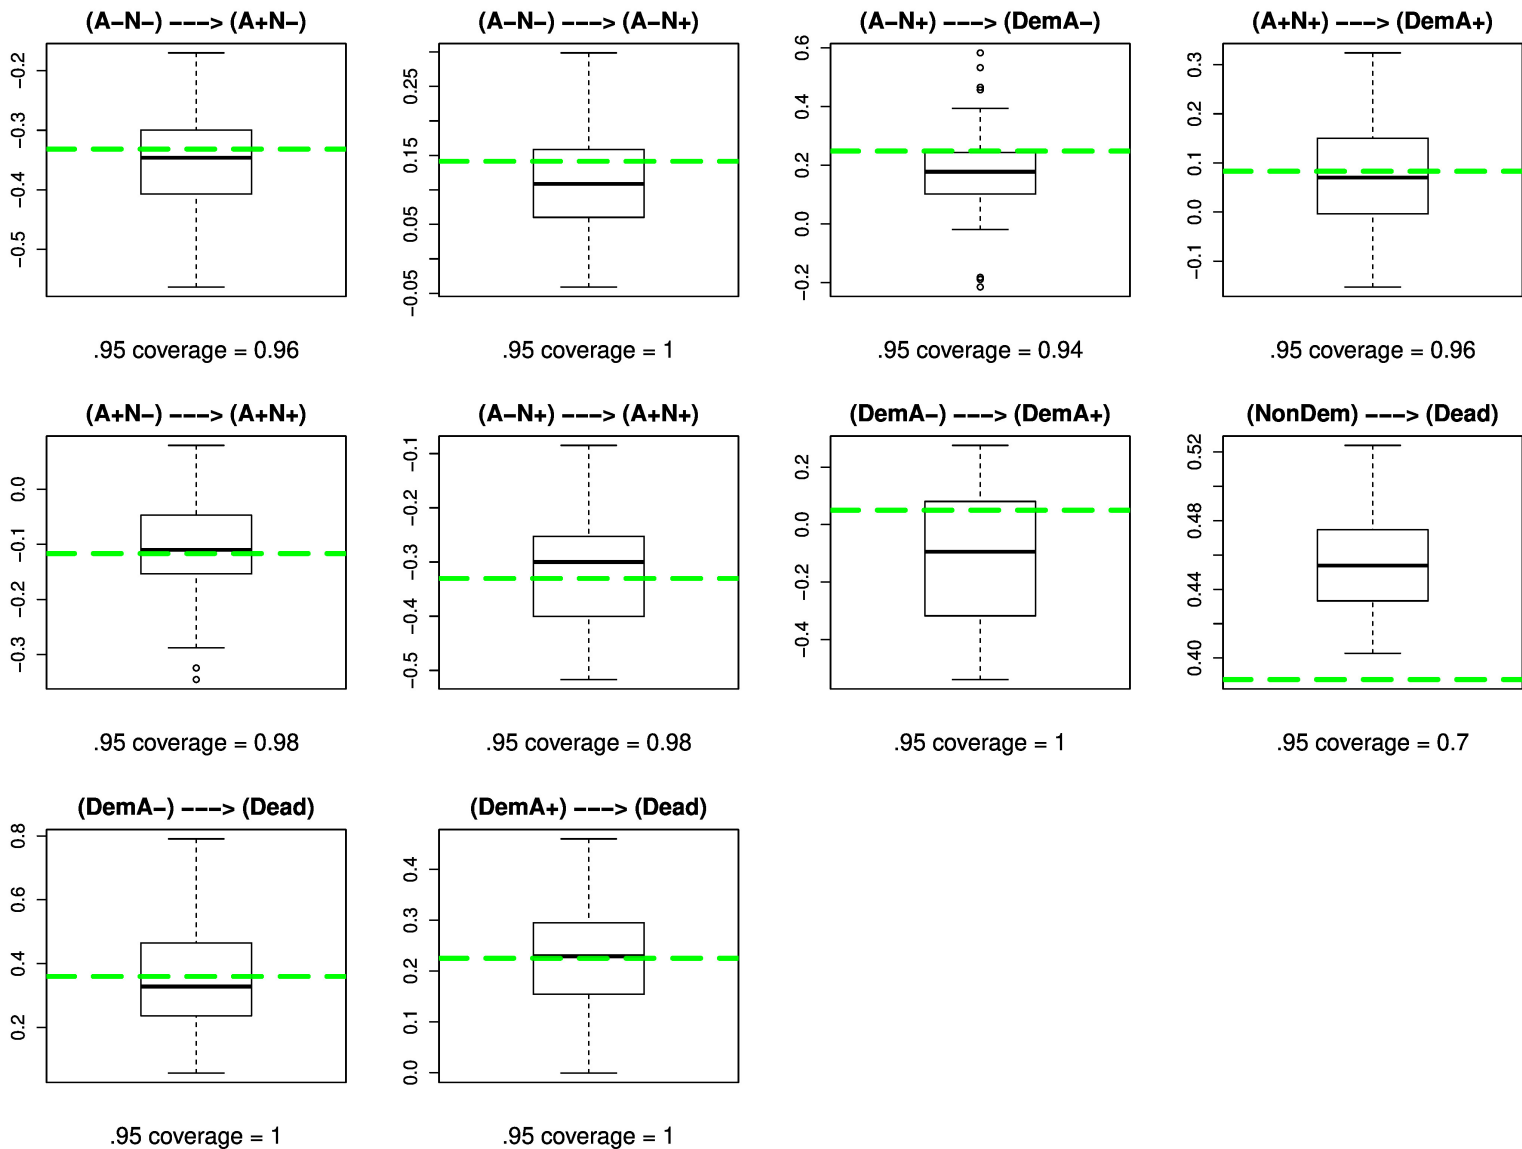

Synthetic MCSA data: log-rate educ parameters

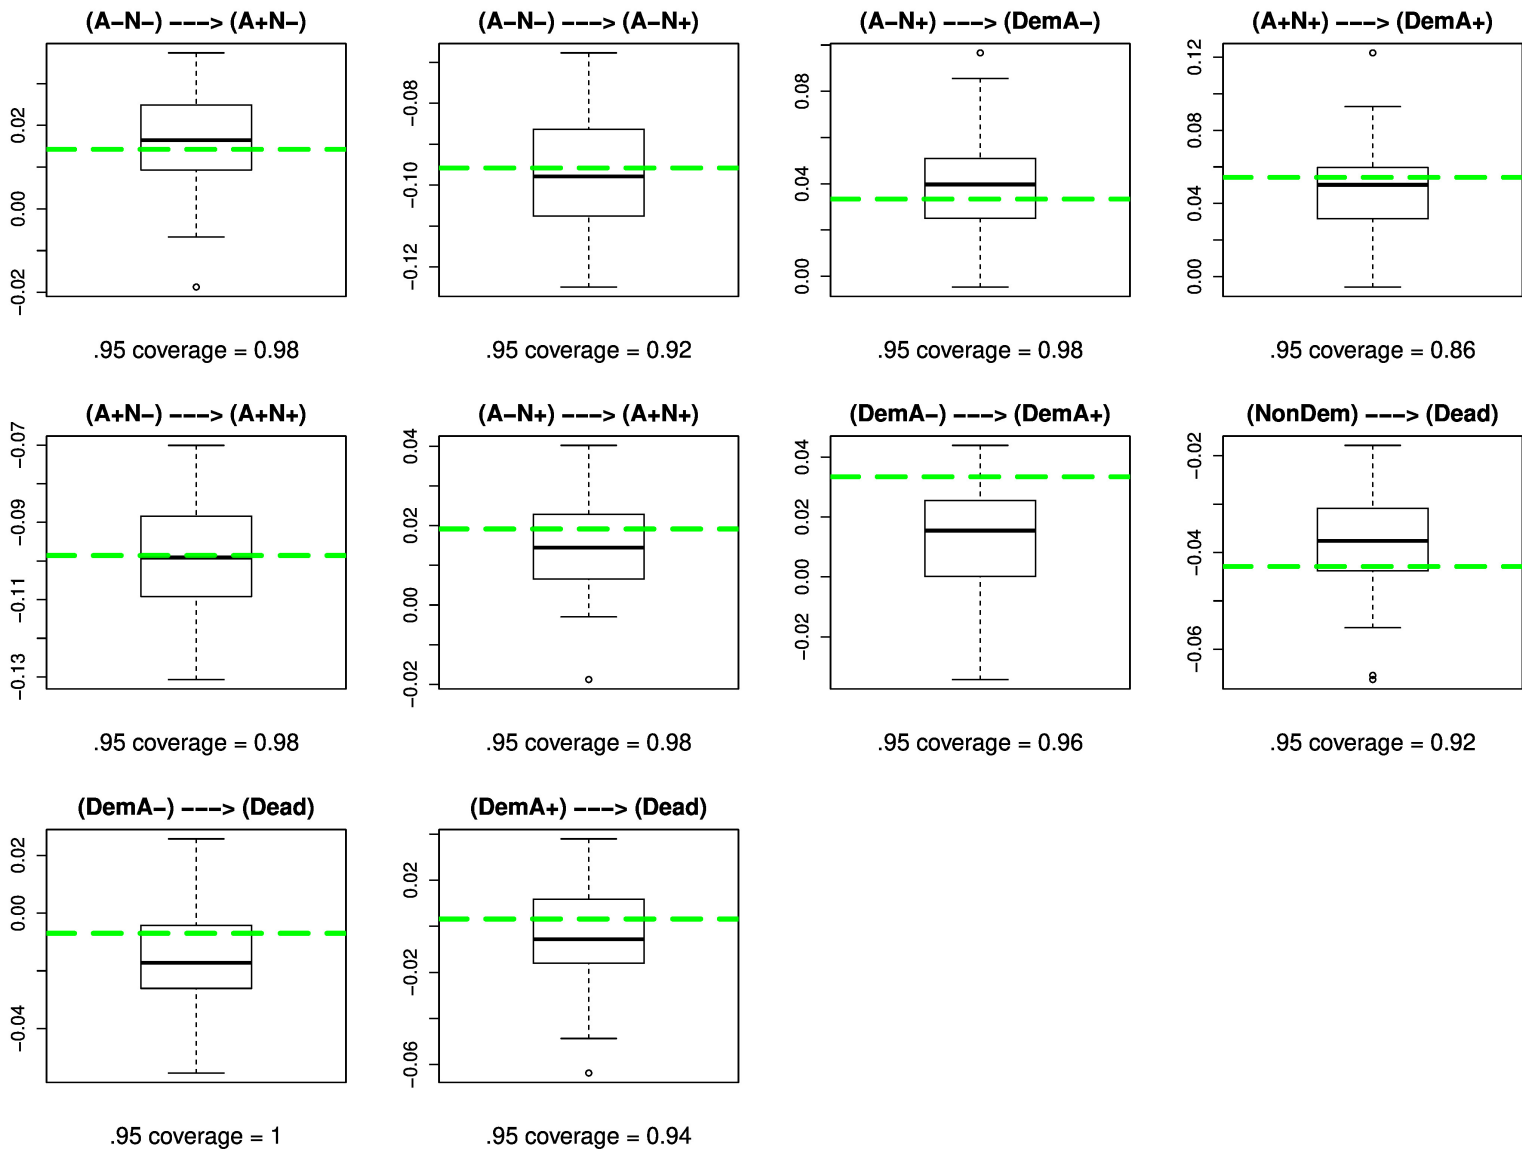

Synthetic MCSA data: log-rate apoe4 parameters

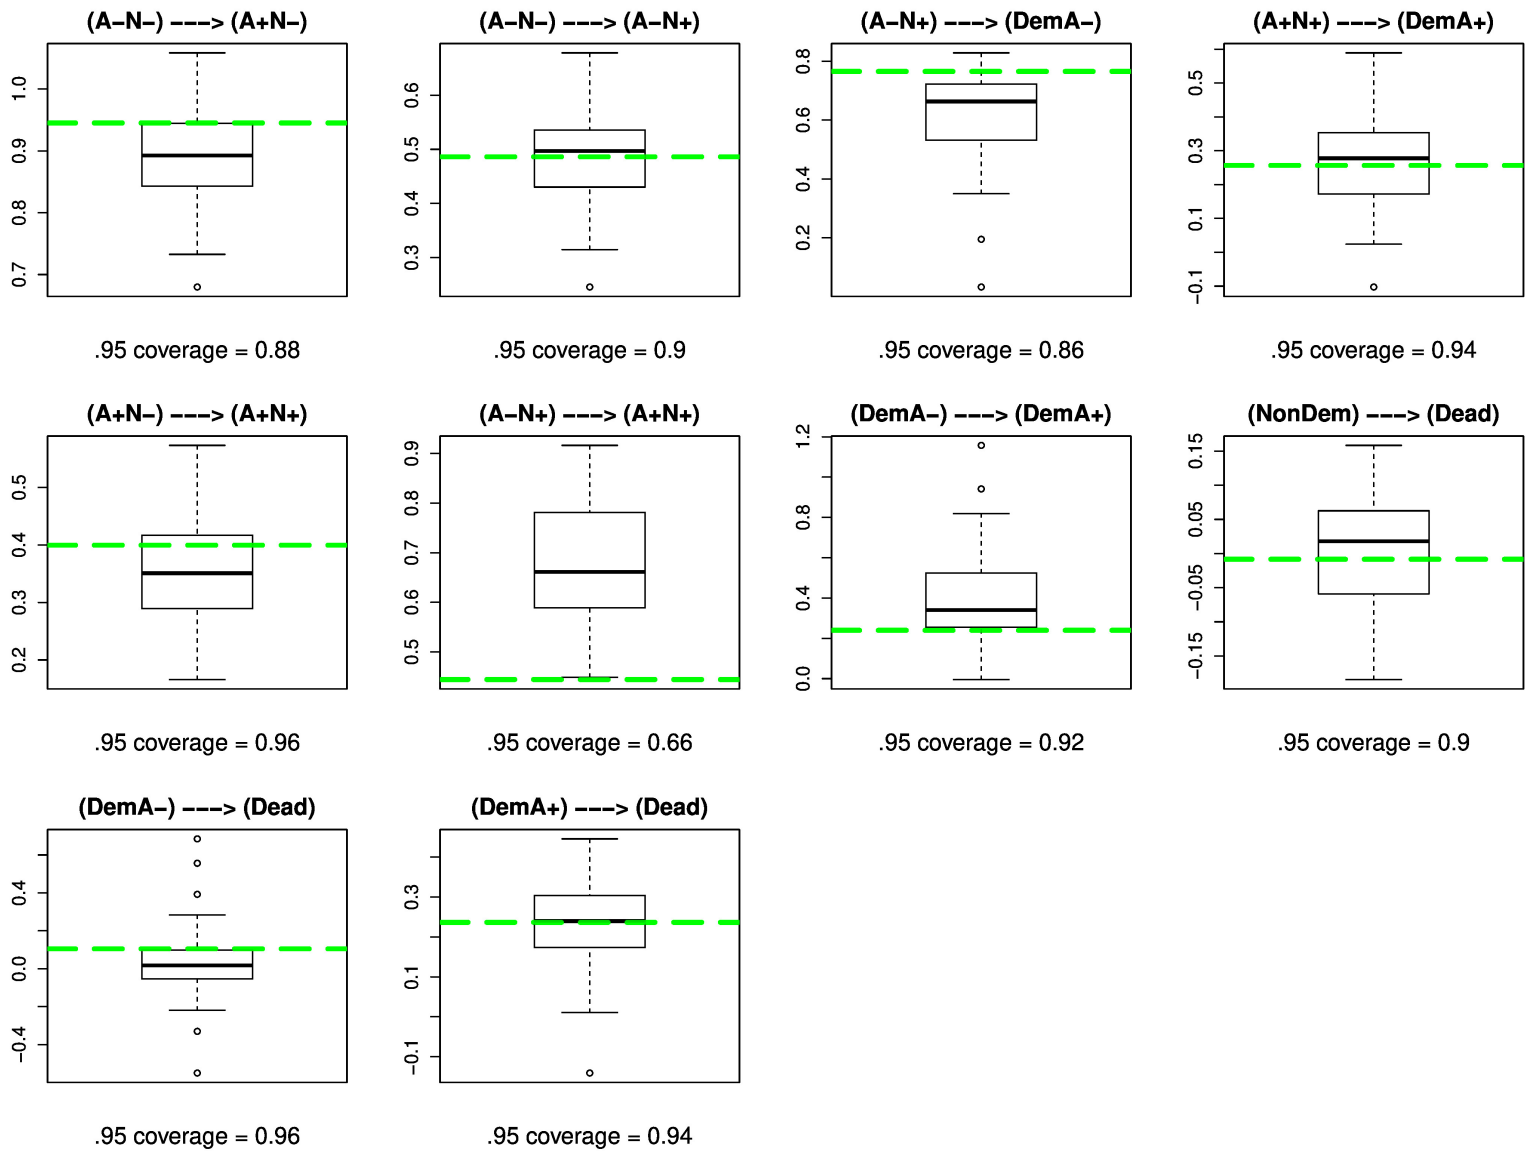

# Synthetic MDSA data: MMSE response parameters

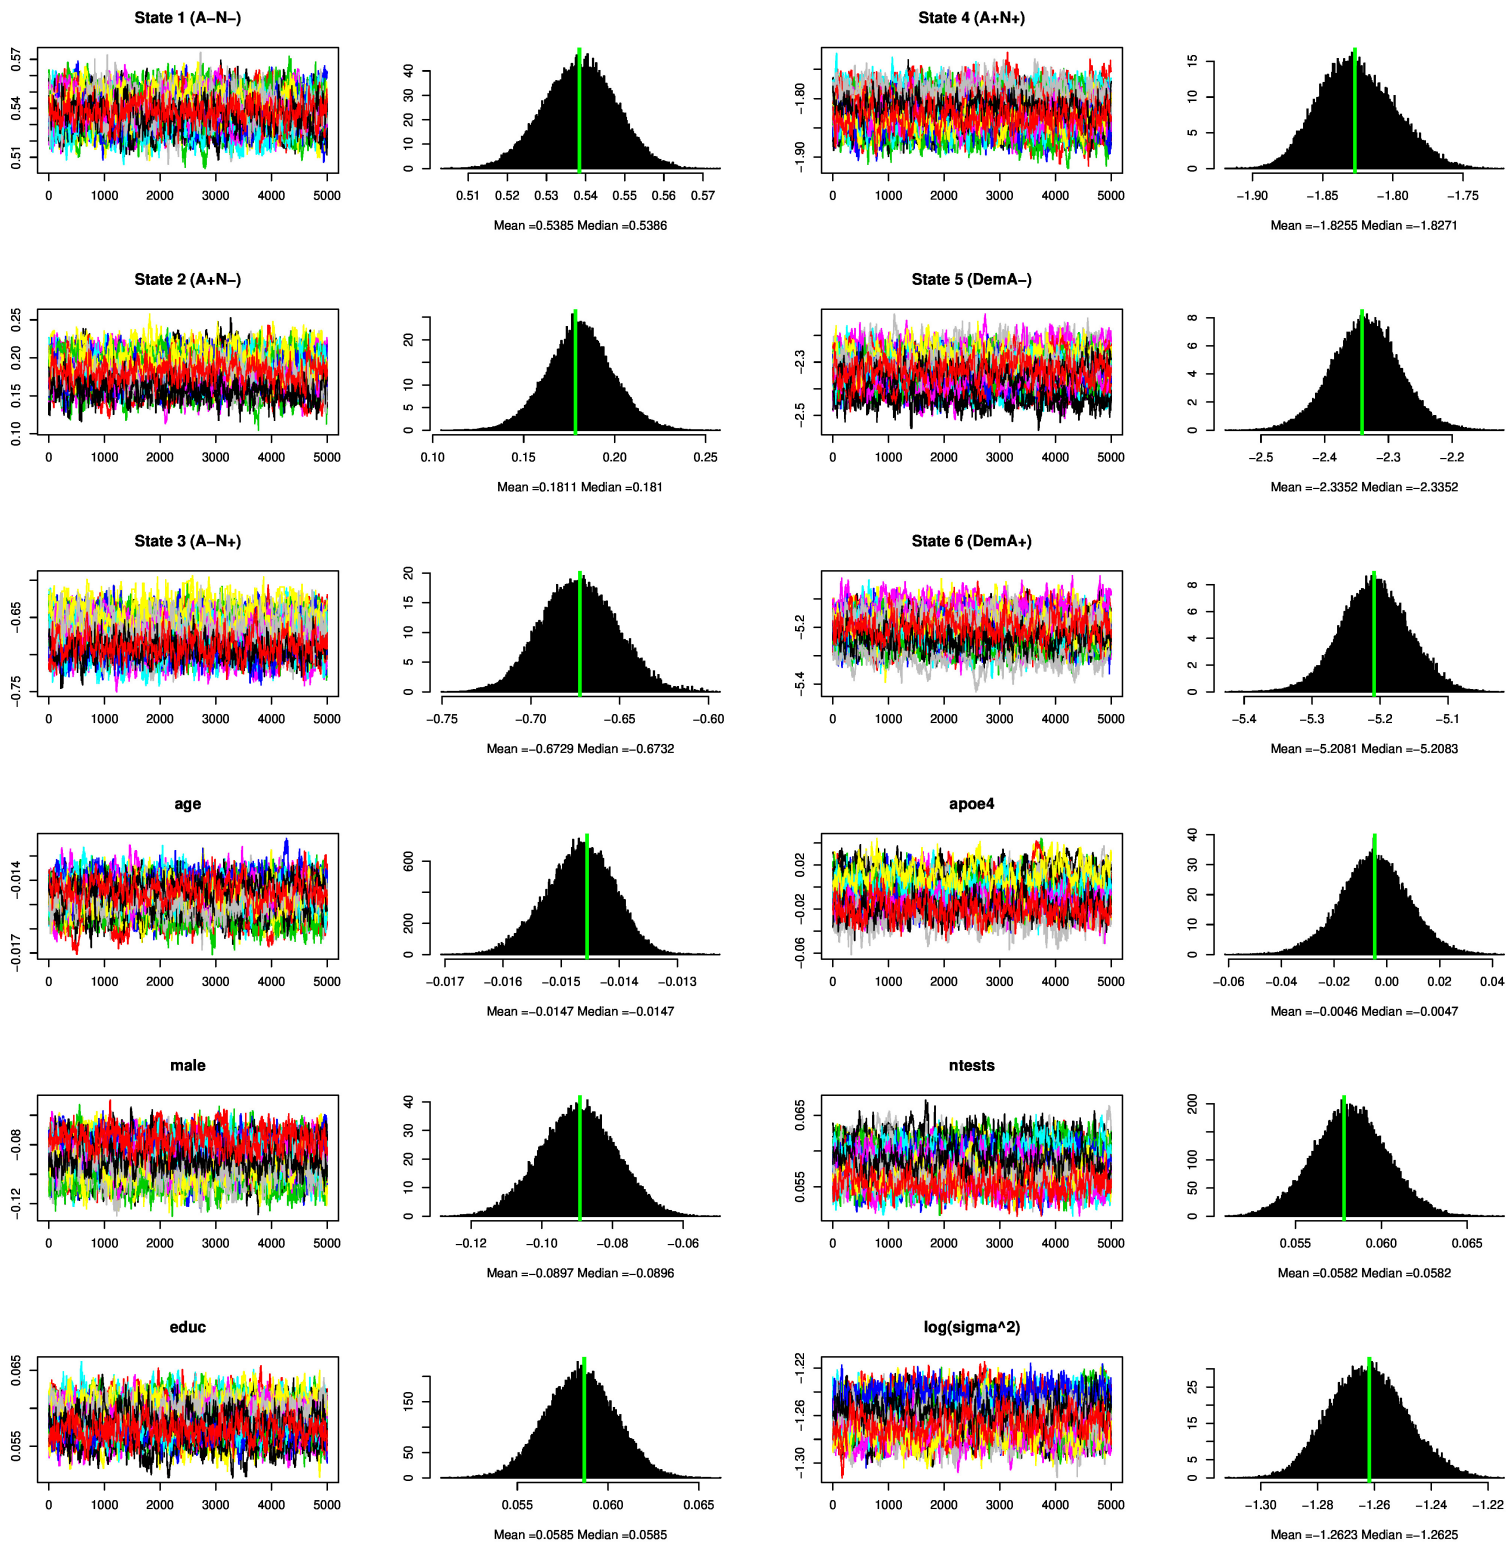

# Synthetic MCSA data: other response parameters, and initial probability parameters

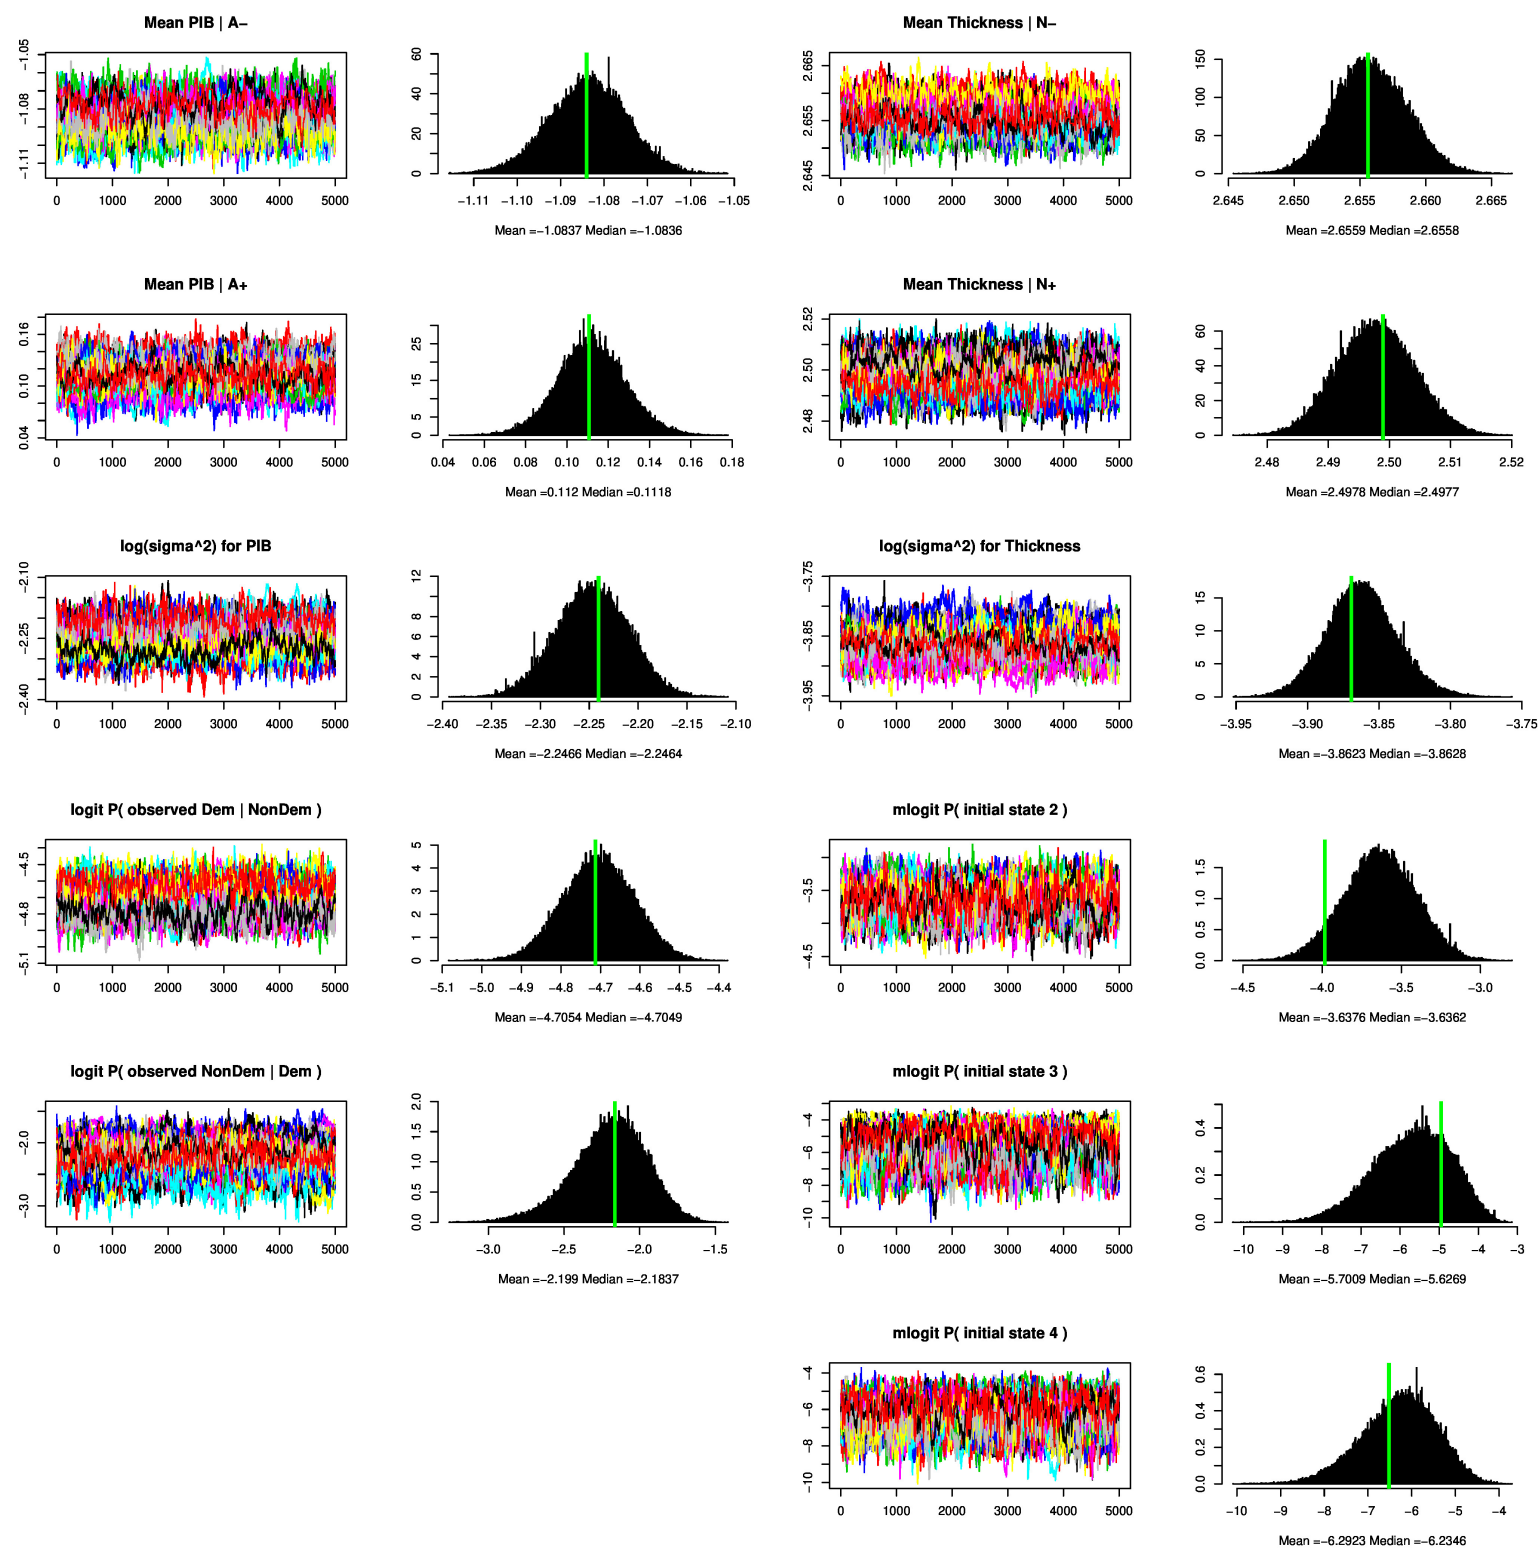

# Synthetic MCSA data: log-rate intercept and death bias parameters

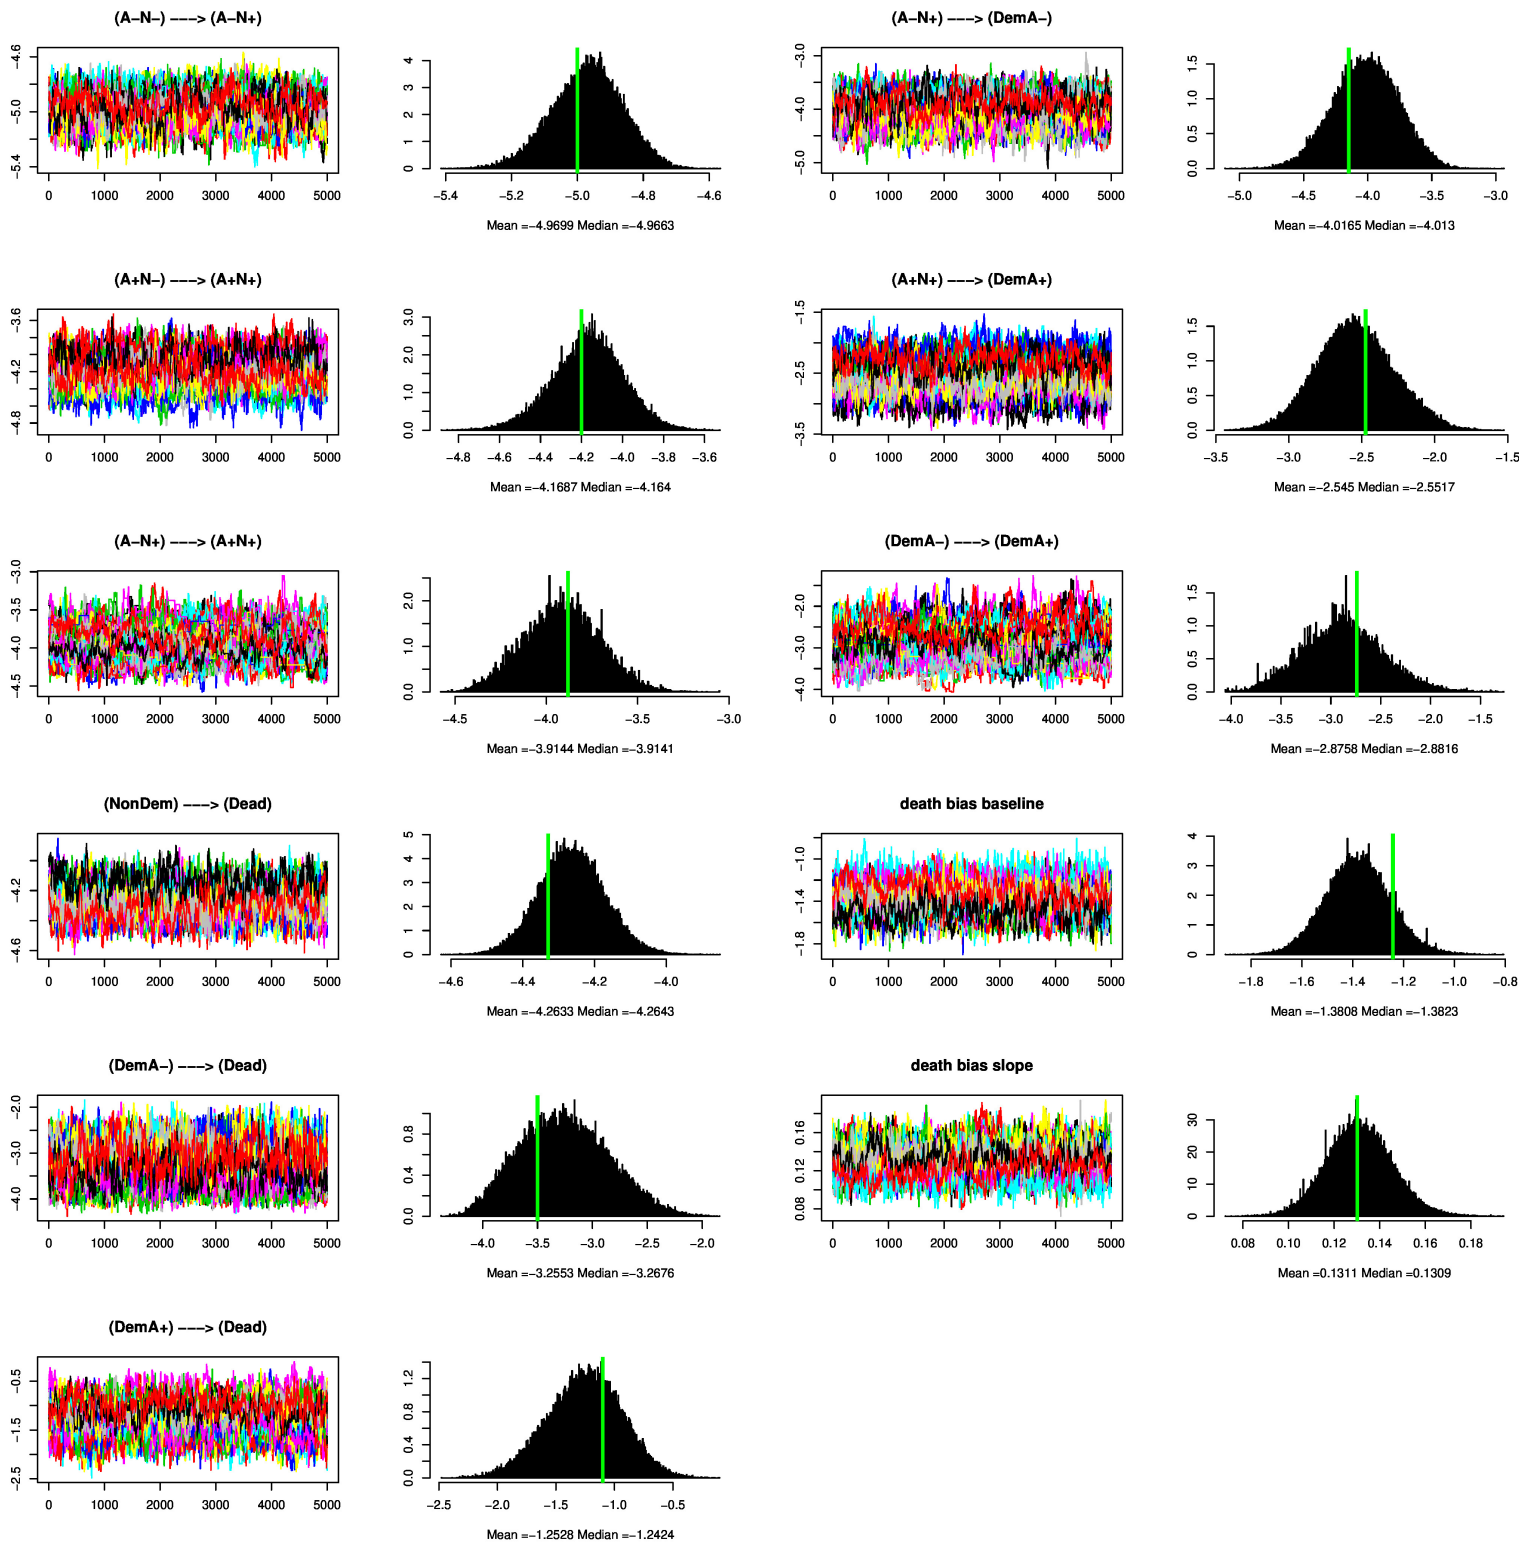



Synthetic MCSA data: log-rate iage parameters

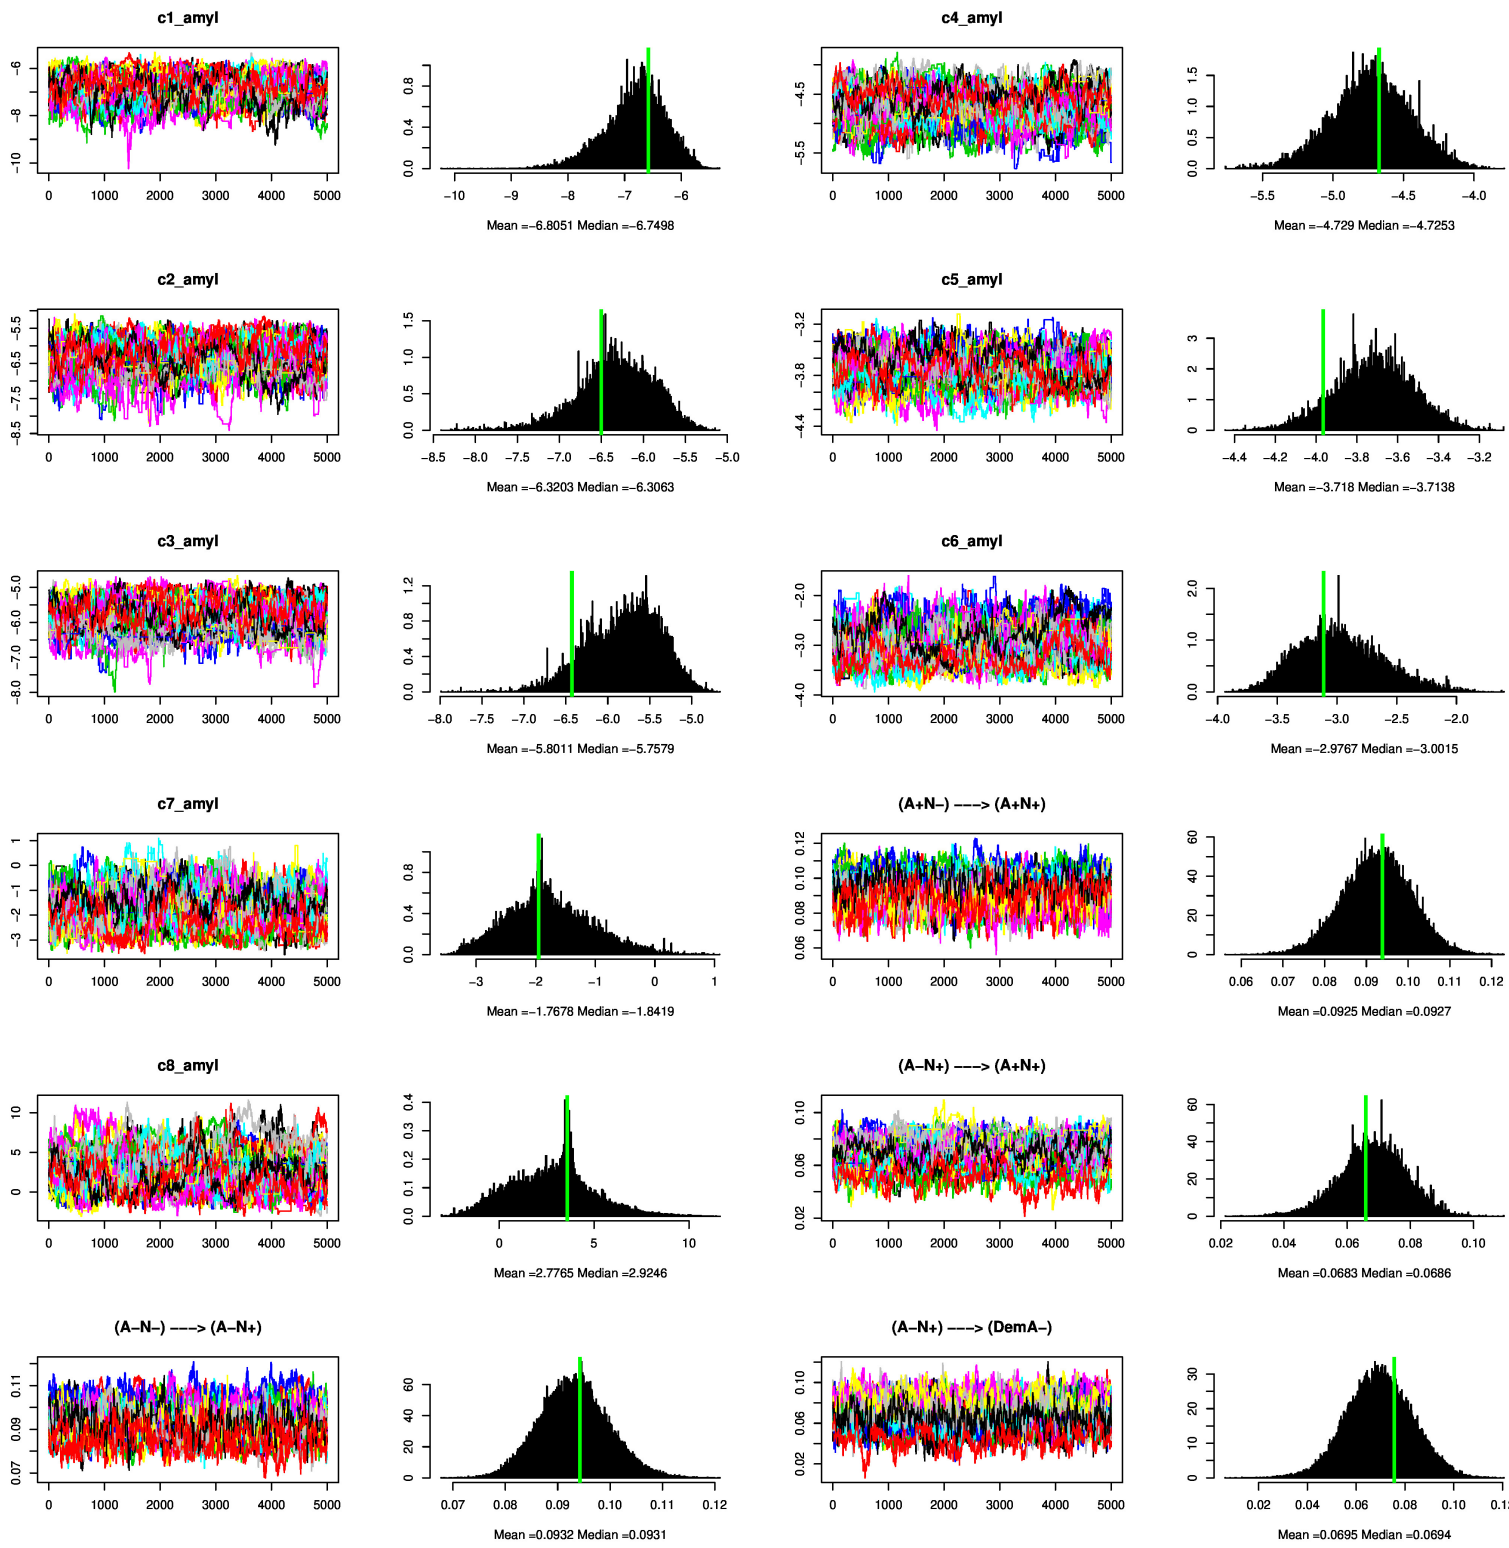



# Synthetic MCSA data: log-rate iage parameters (continued)

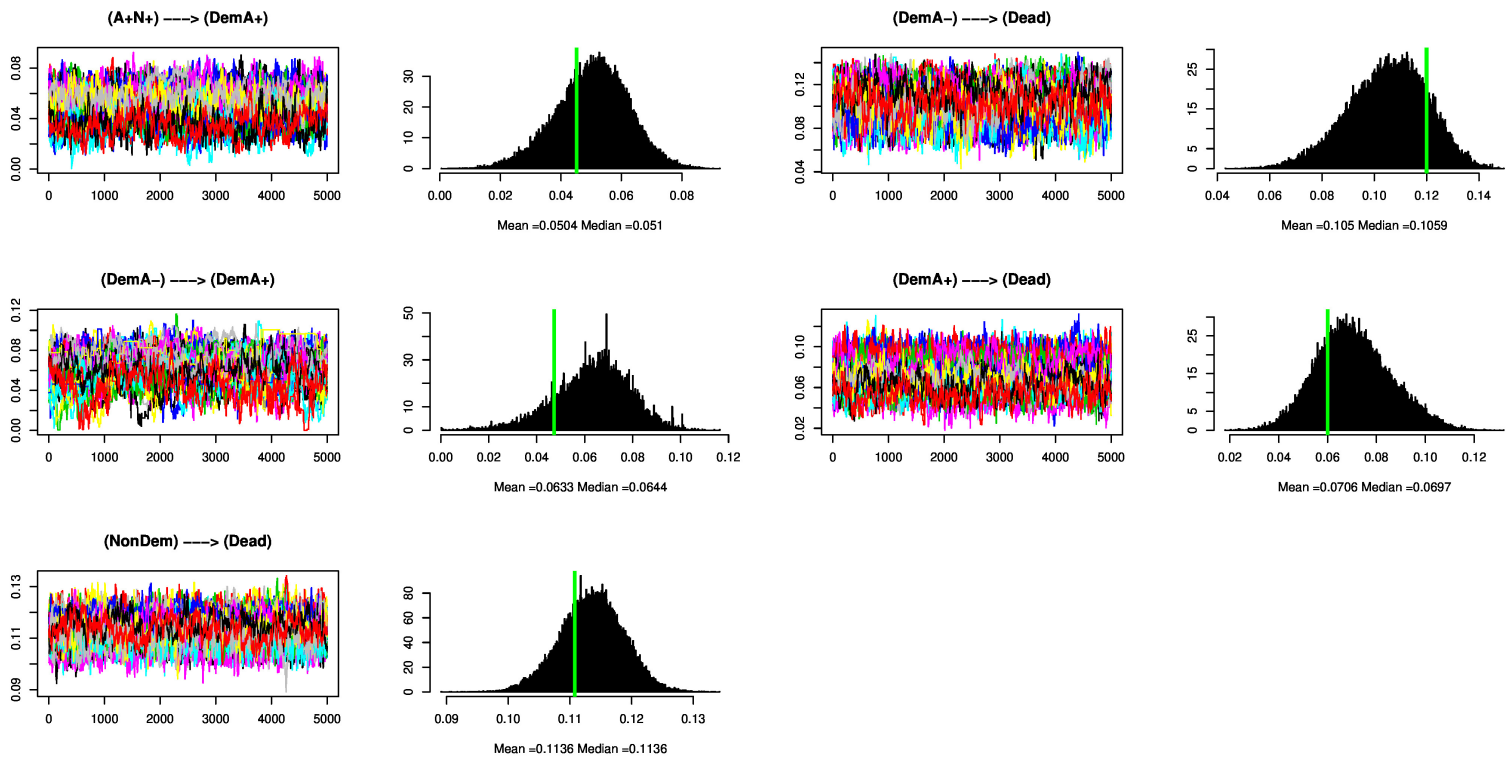

Synthetic MDSA data: log-rate male parameters

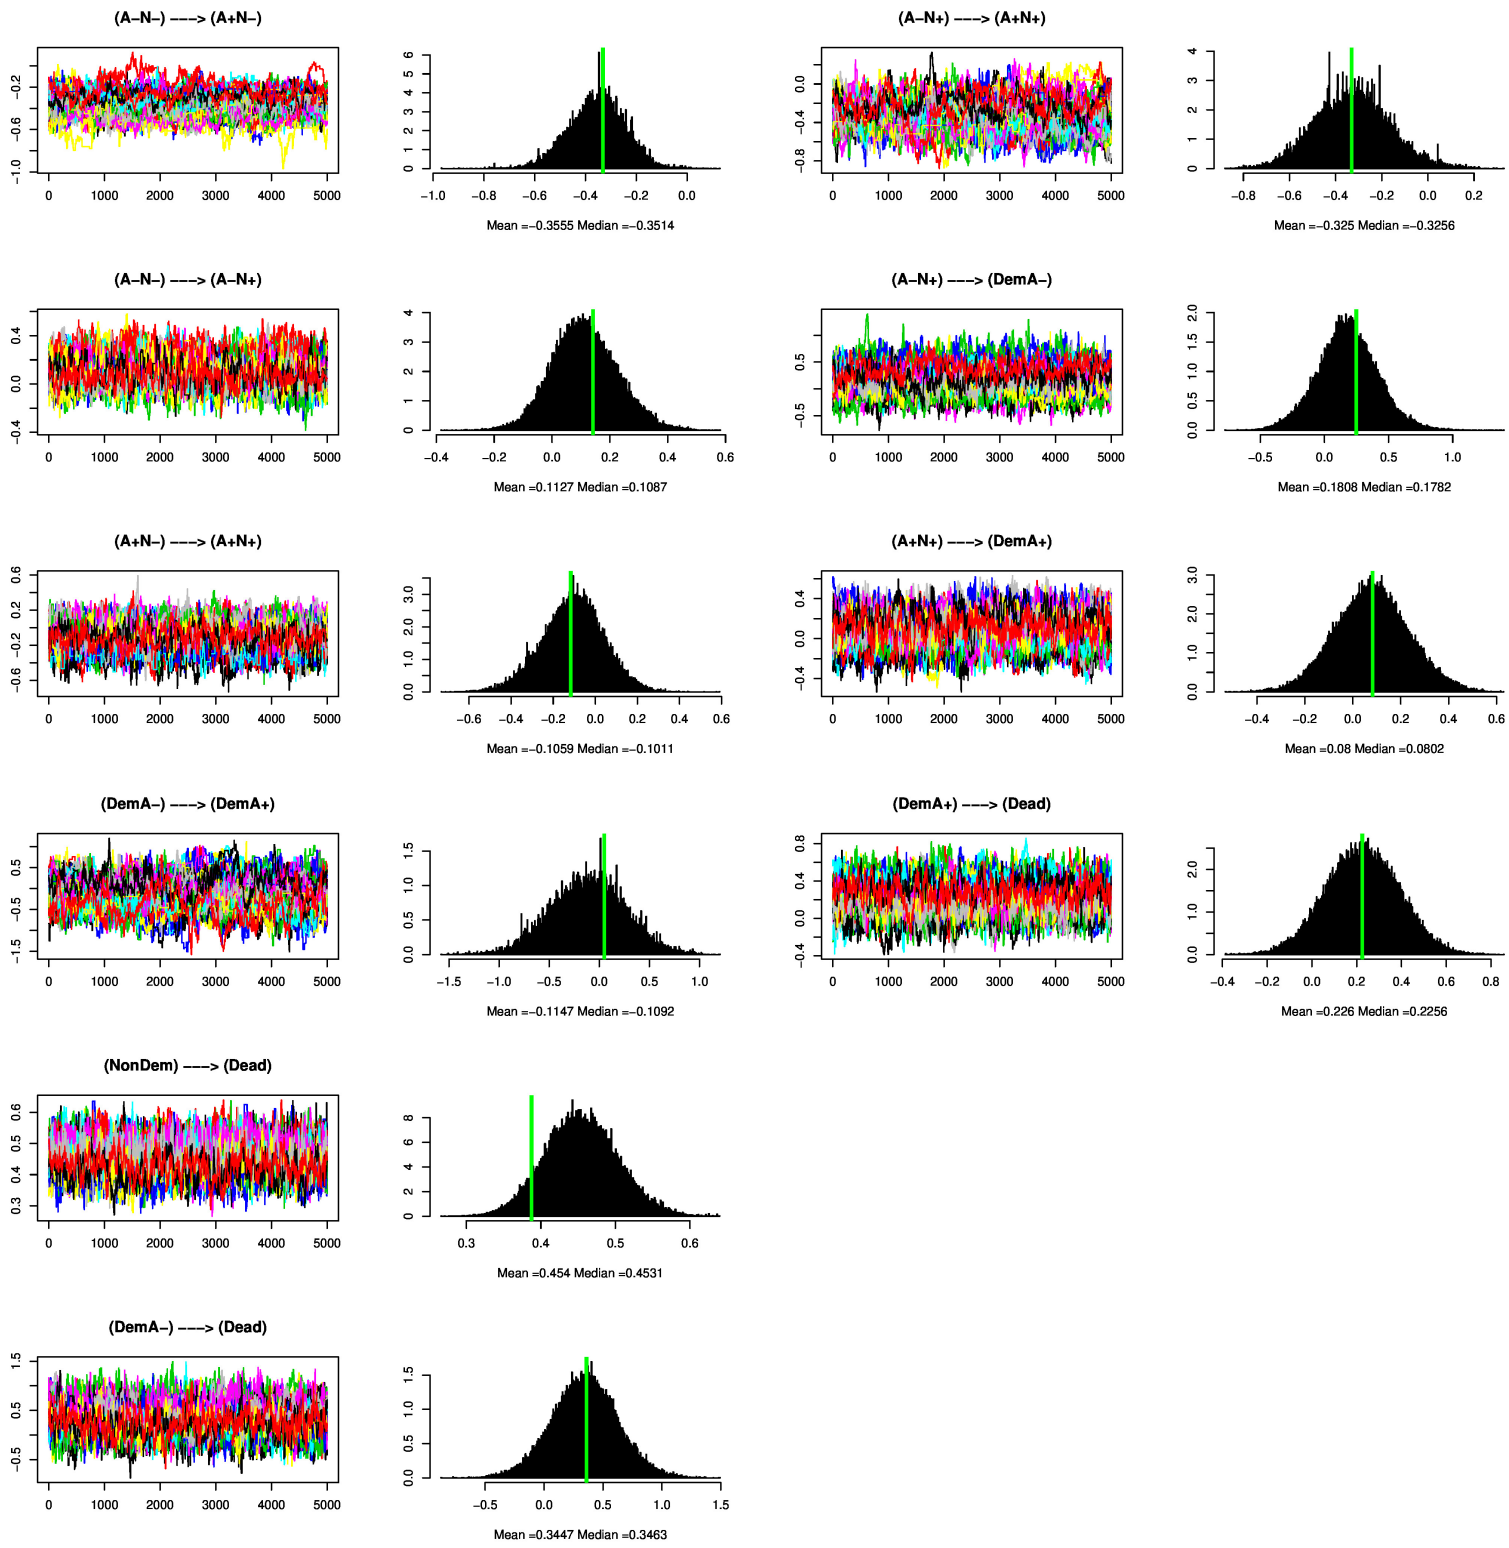

# Synthetic MCSA data: log-rate educ parameters

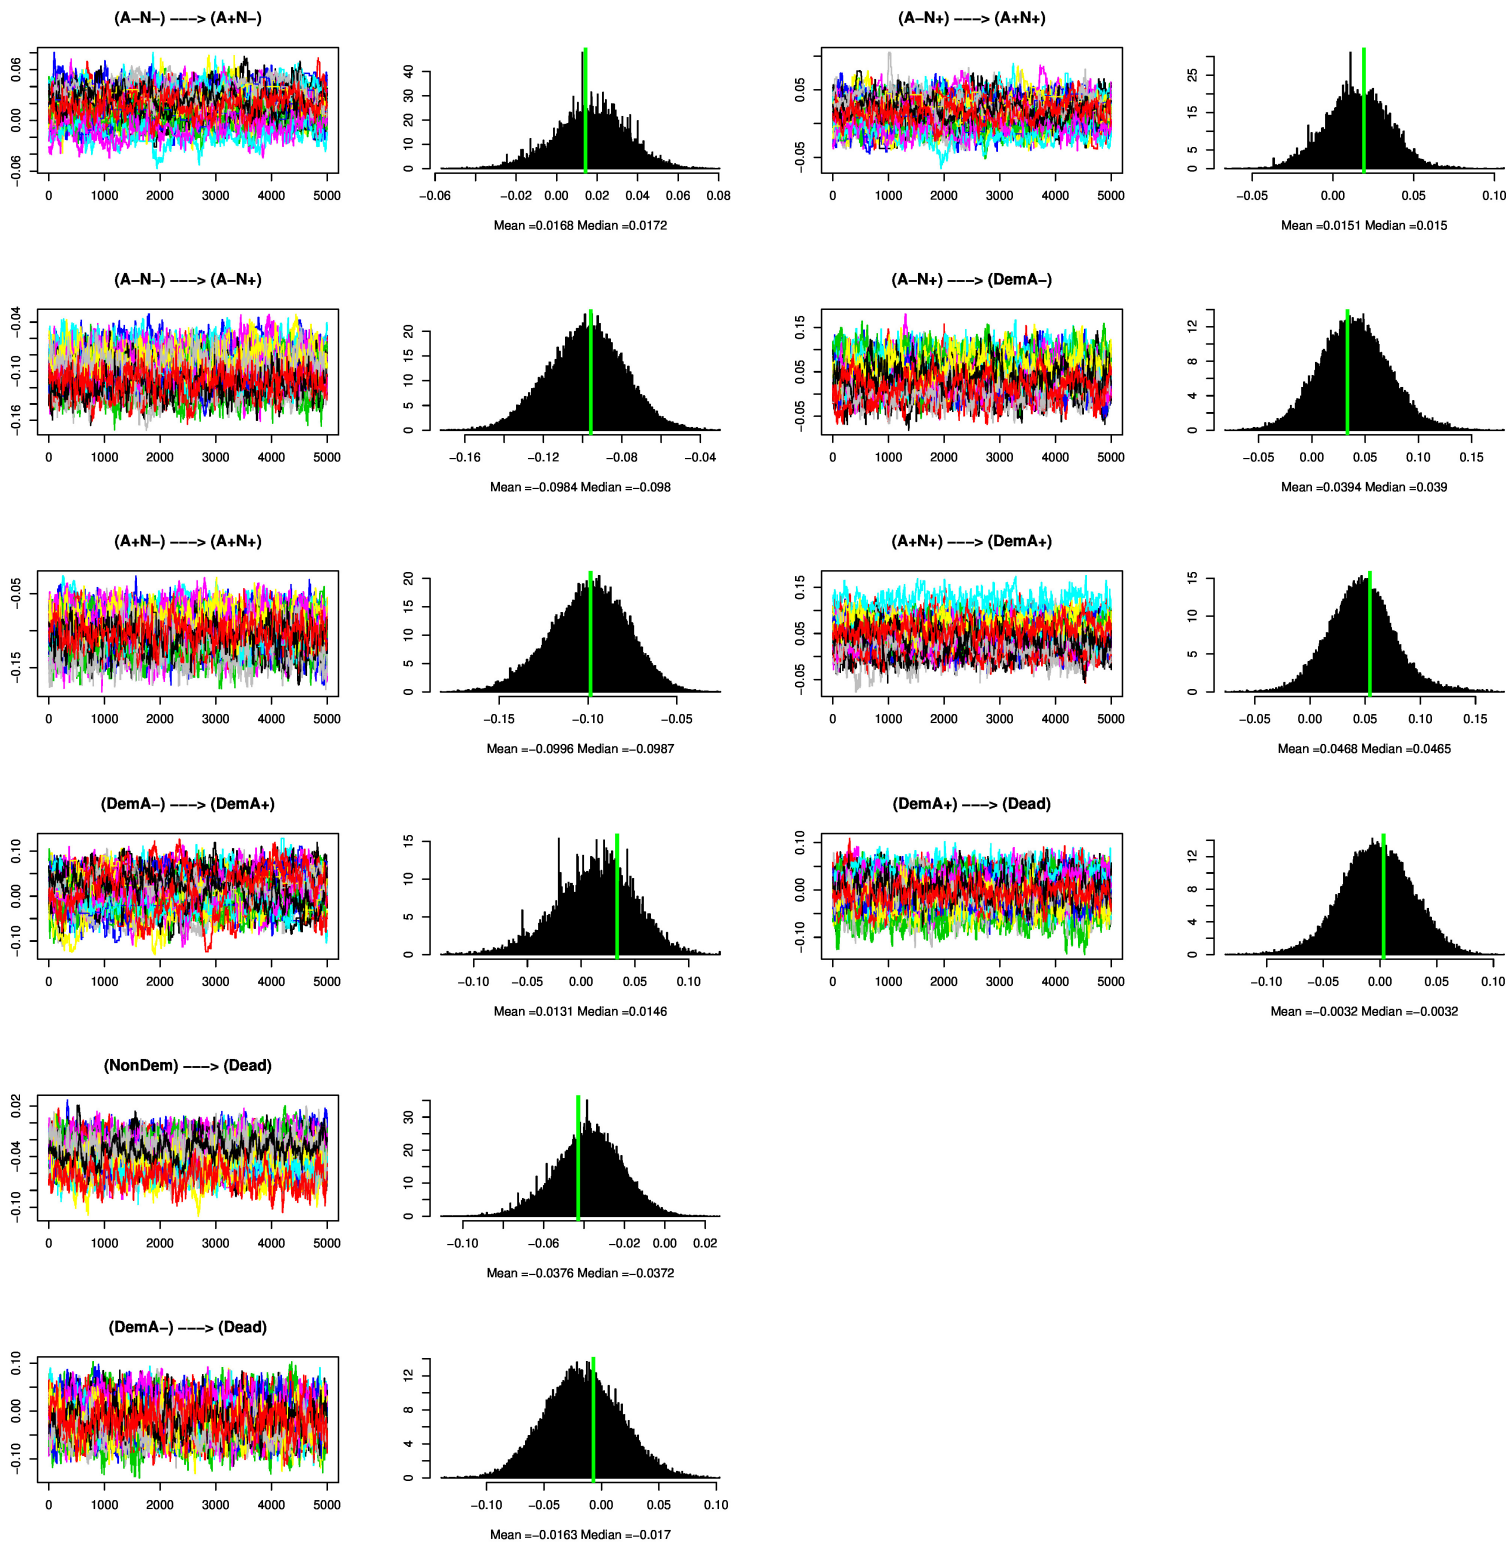

# Synthetic MCSA data: log-rate apoe4 parameters

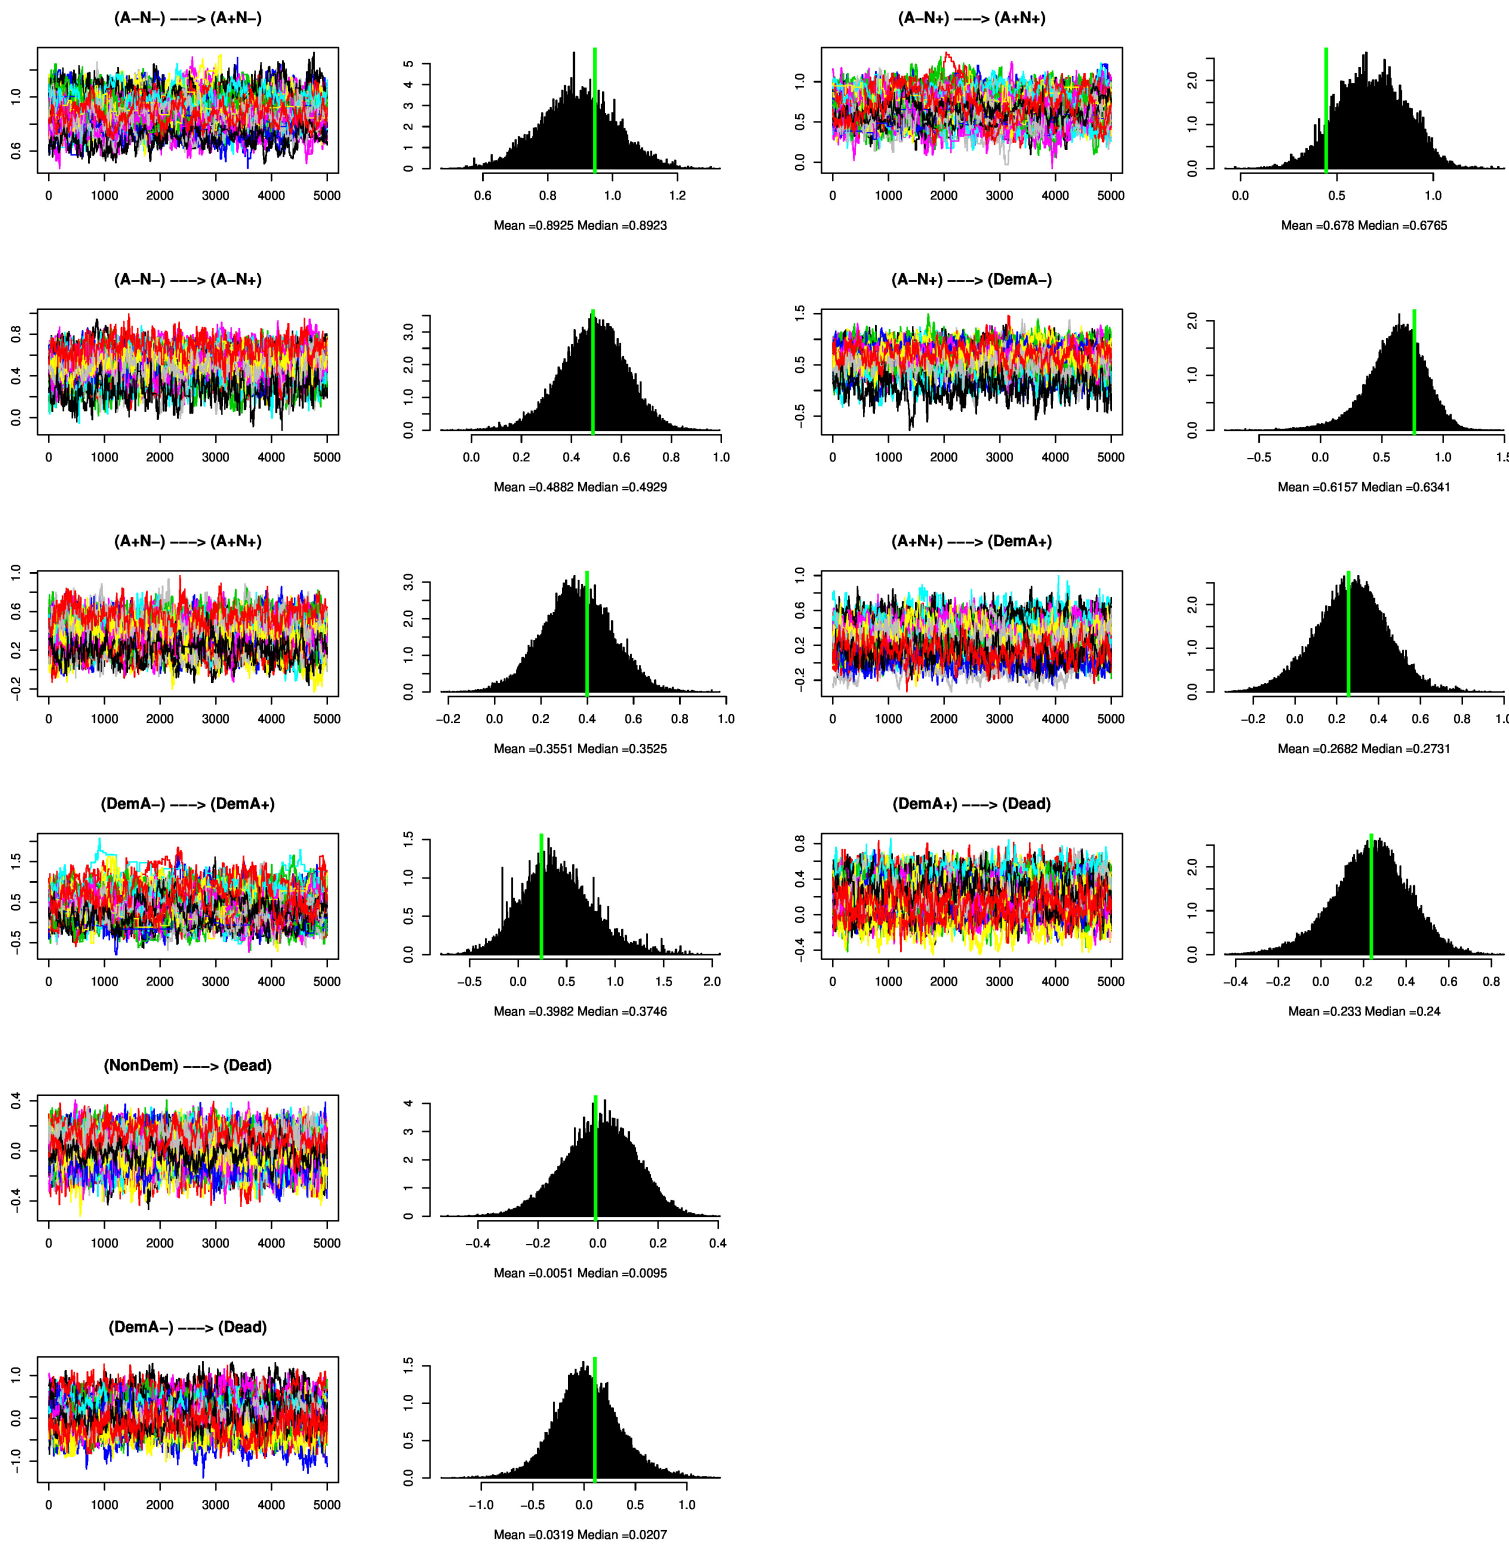

Supplement: Supplementary file 5 [file 3]
