# Supplementary material
Source: publisher figshare collection journal article supplement (https://tandf.figshare.com/articles/dataset/_/7874162)

# Supplementary Material C: Sensitivity test of real MCSA data results

## Sensitivity test of real MCSA data: MMSE response parameters

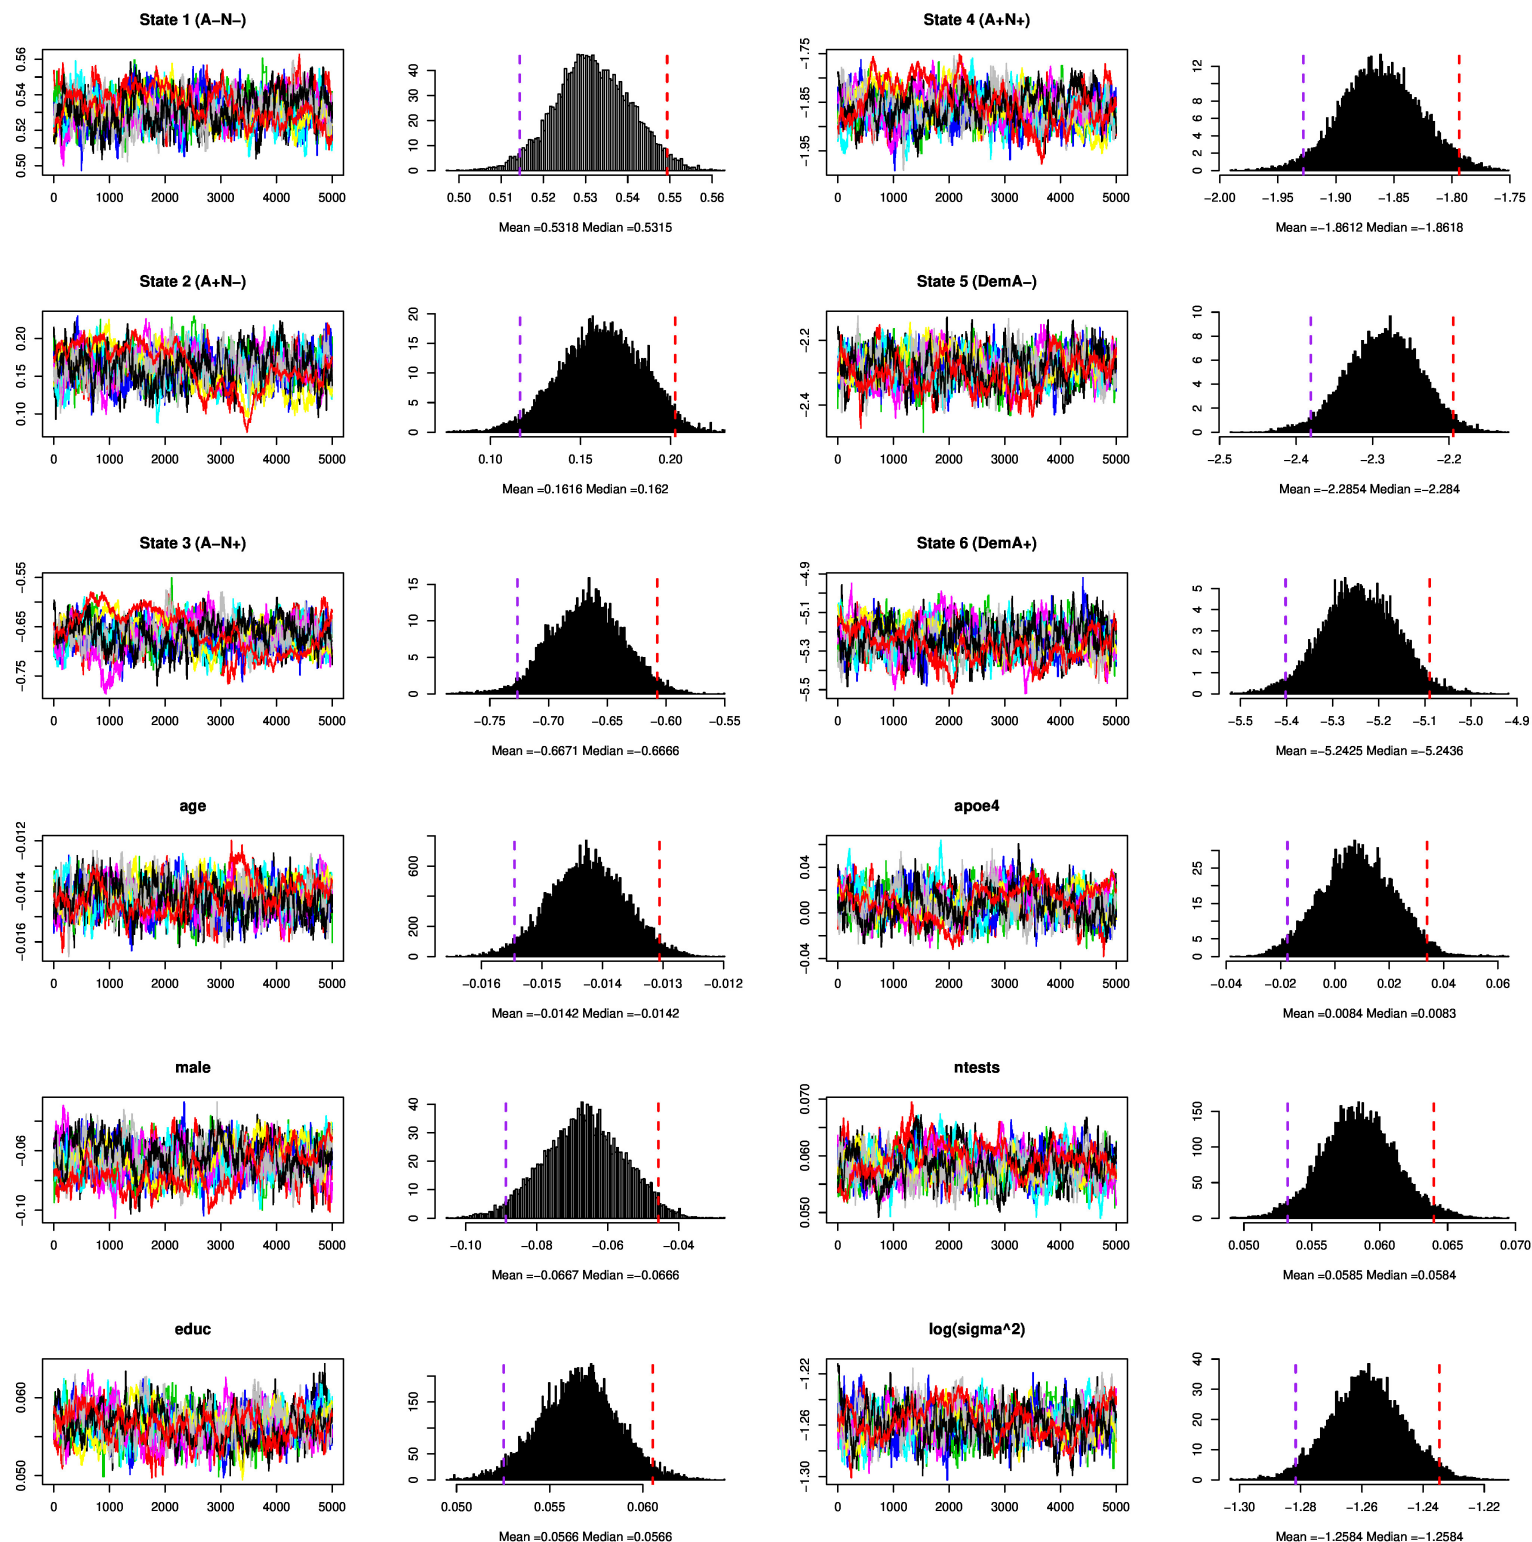

# Sensitivity test of real MCSA data: other response parameters, and initial probability parameters

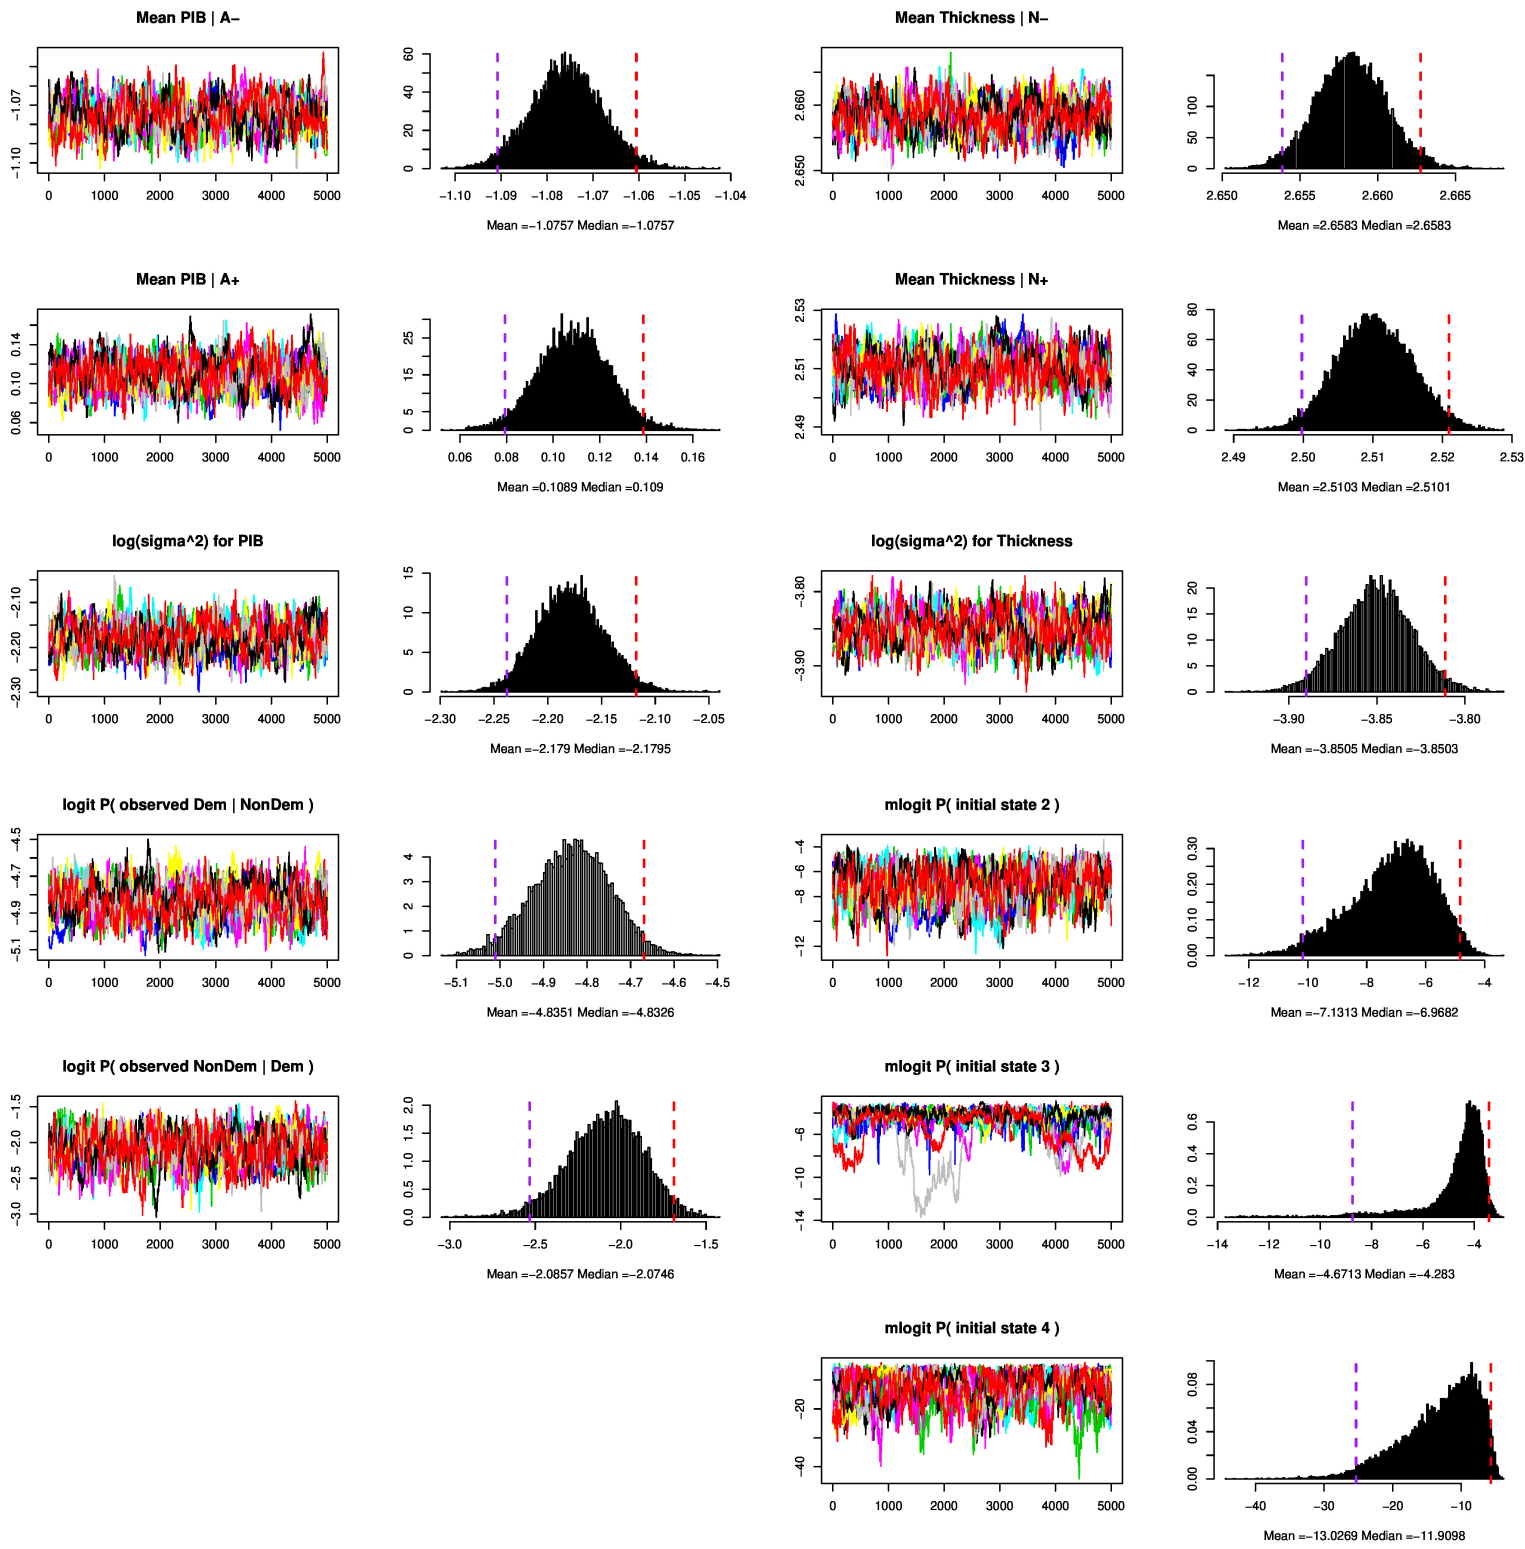

# Sensitivity test of real MCSA data: log-rate intercept and death bias parameters

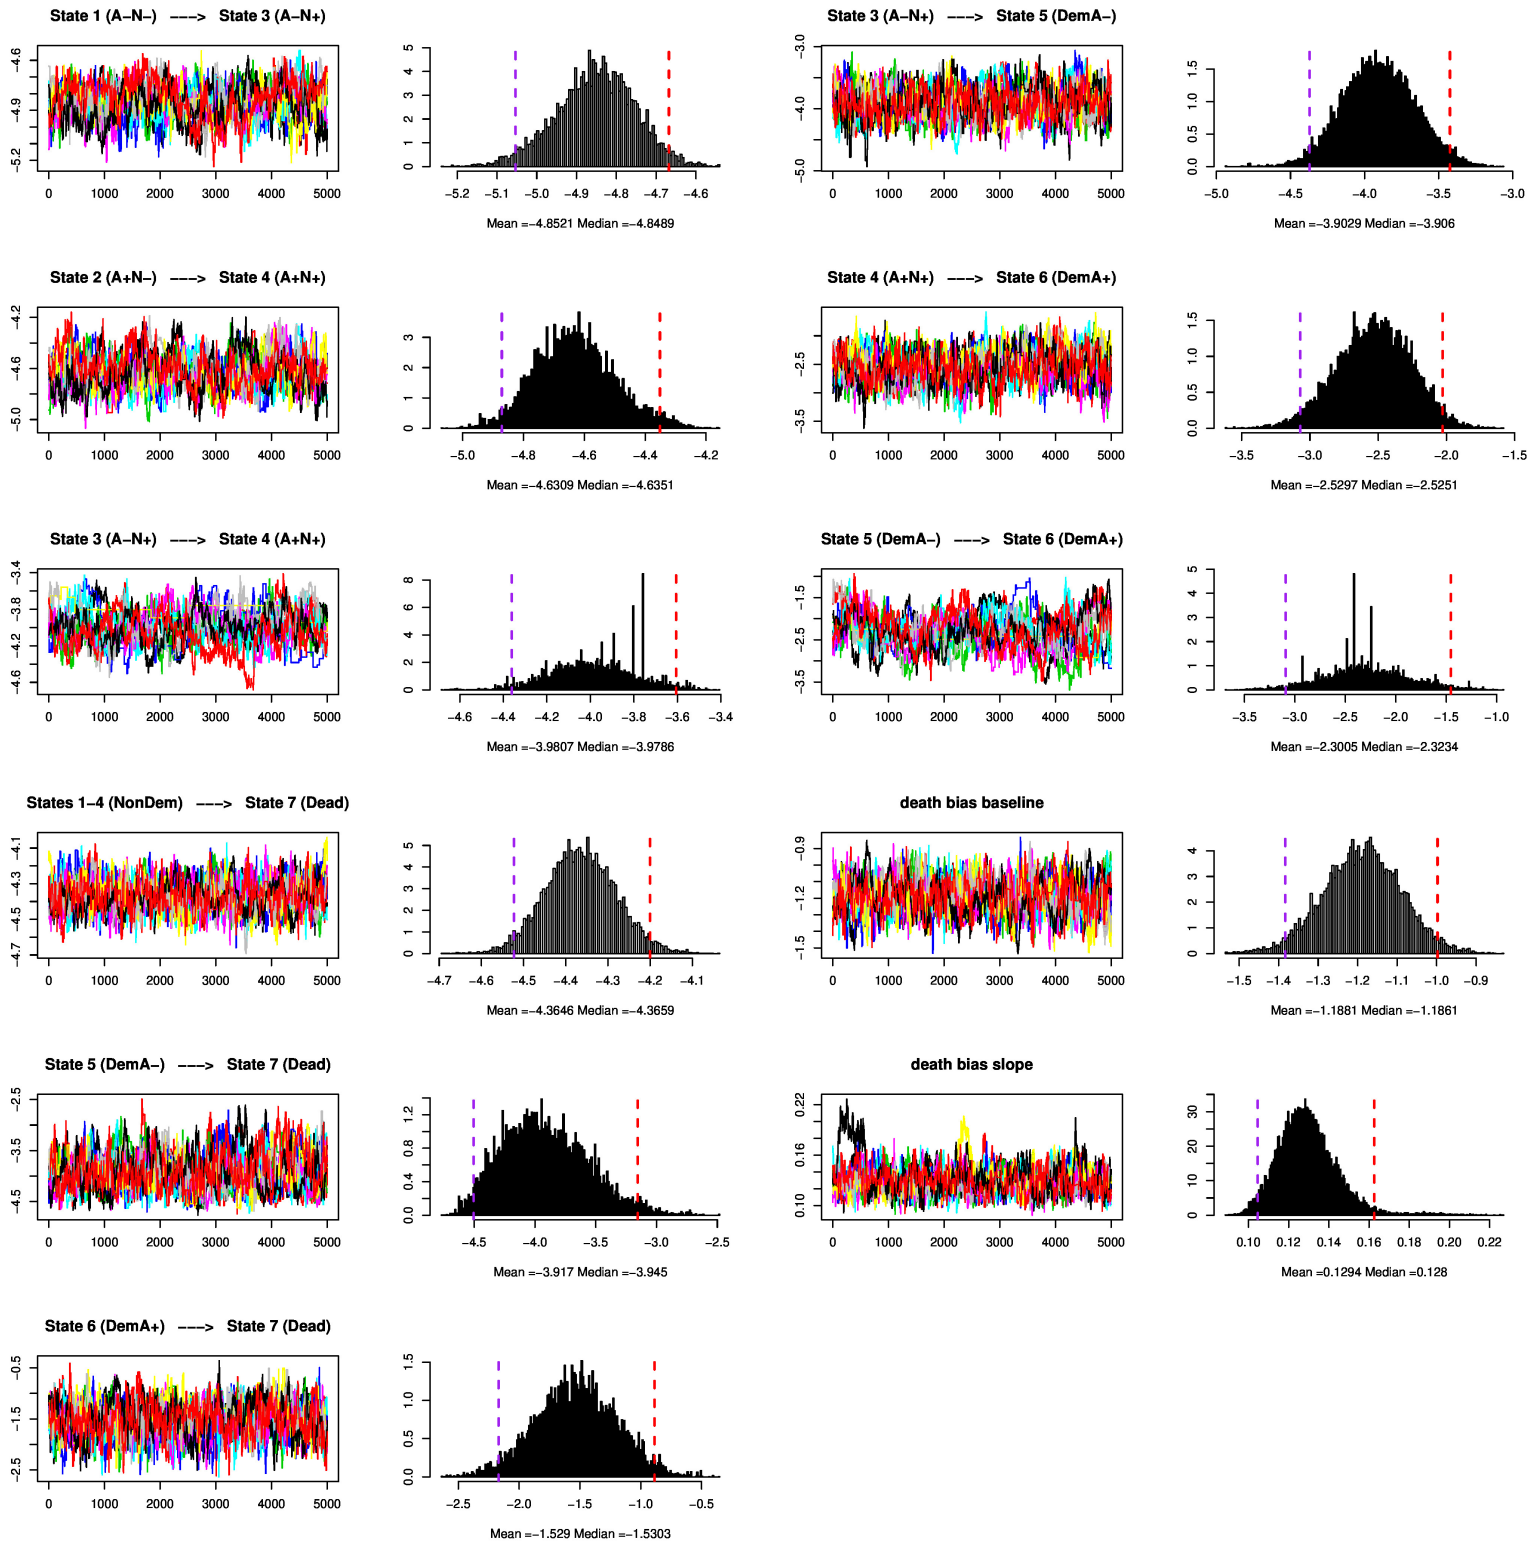

Sensitivity test of real MCSA data: log-rate iage parameters

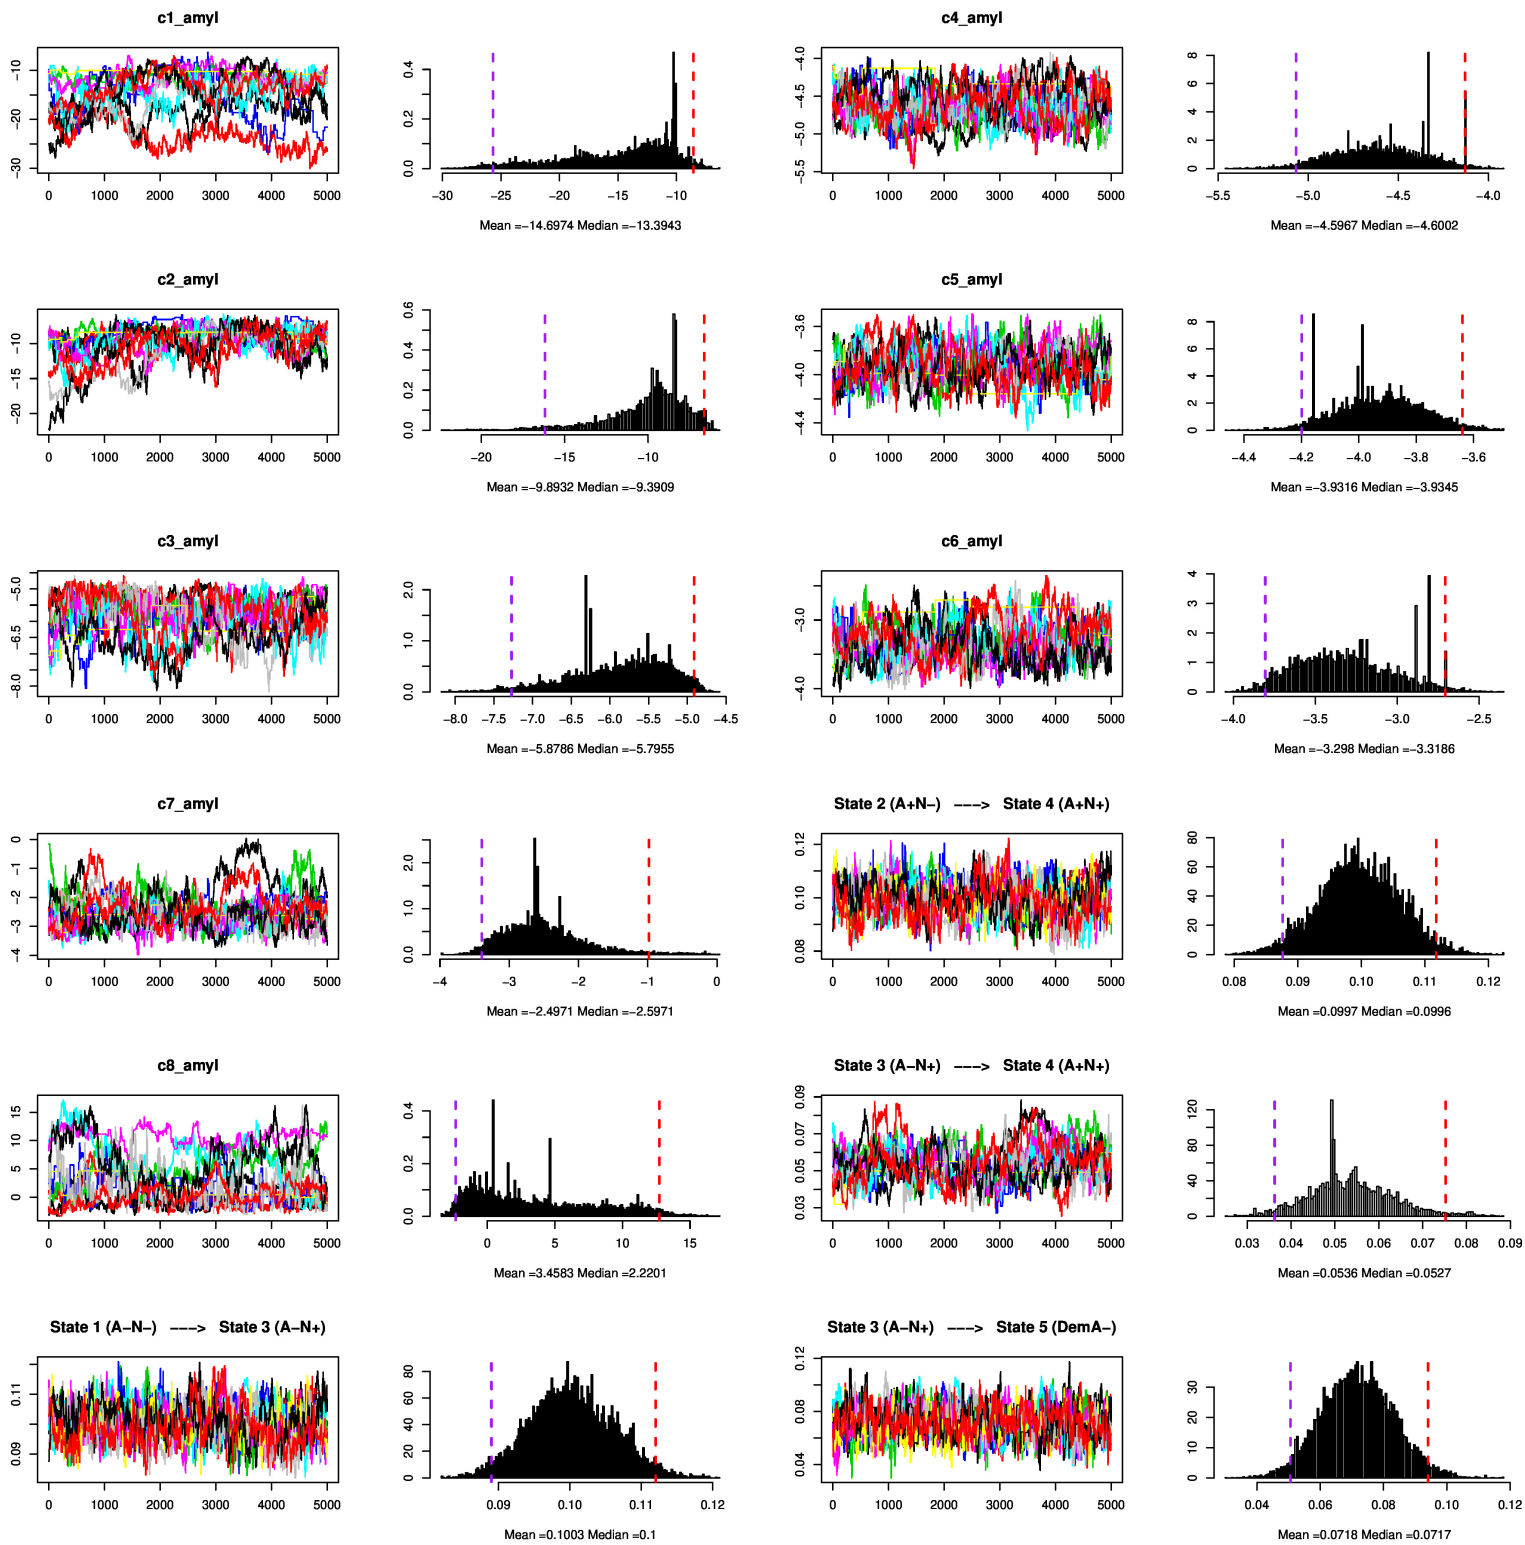



Sensitivity test of real MCSA data: log-rate iage parameters (continued)

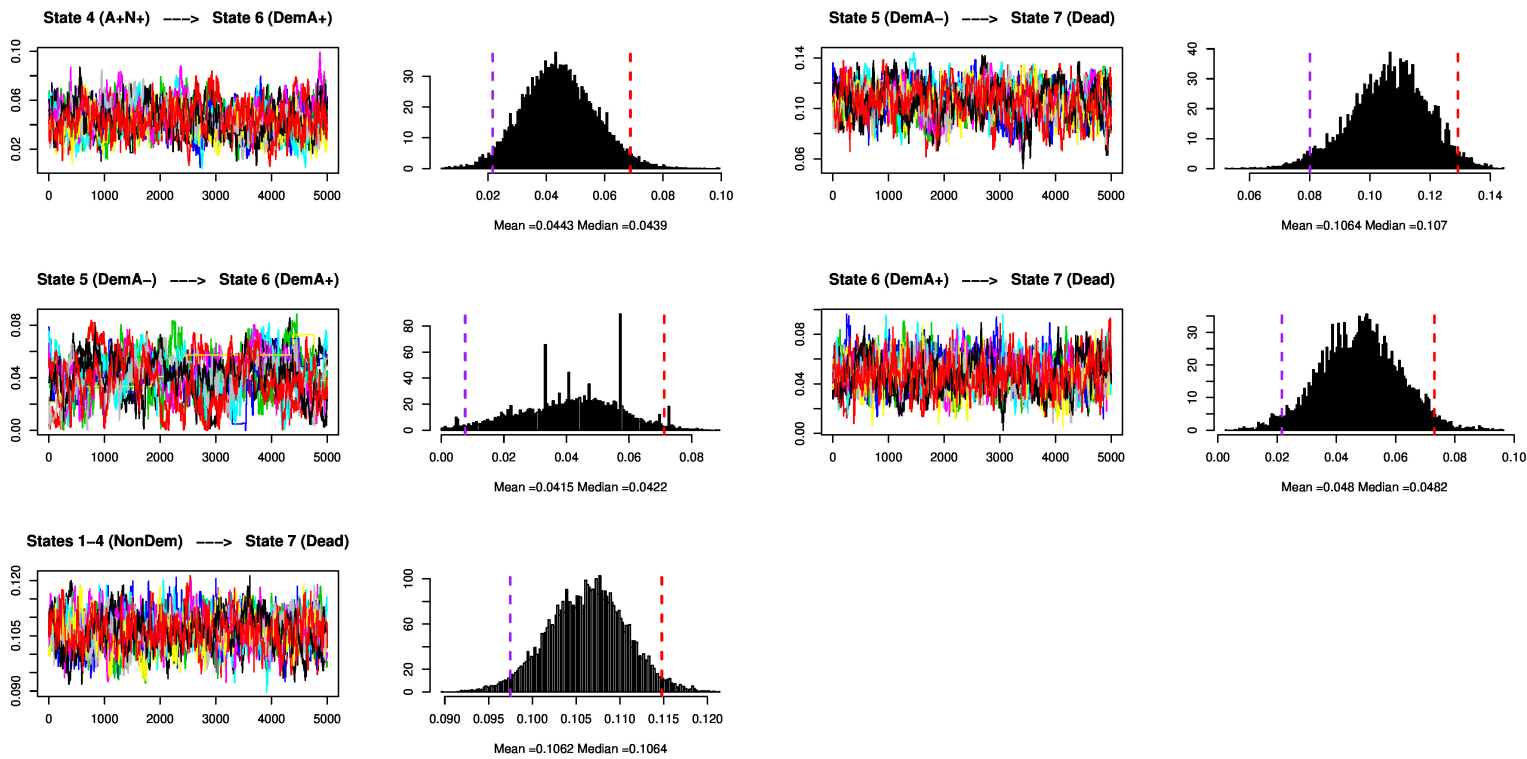

# Sensitivity test of real MCSA data: log-rate male parameters

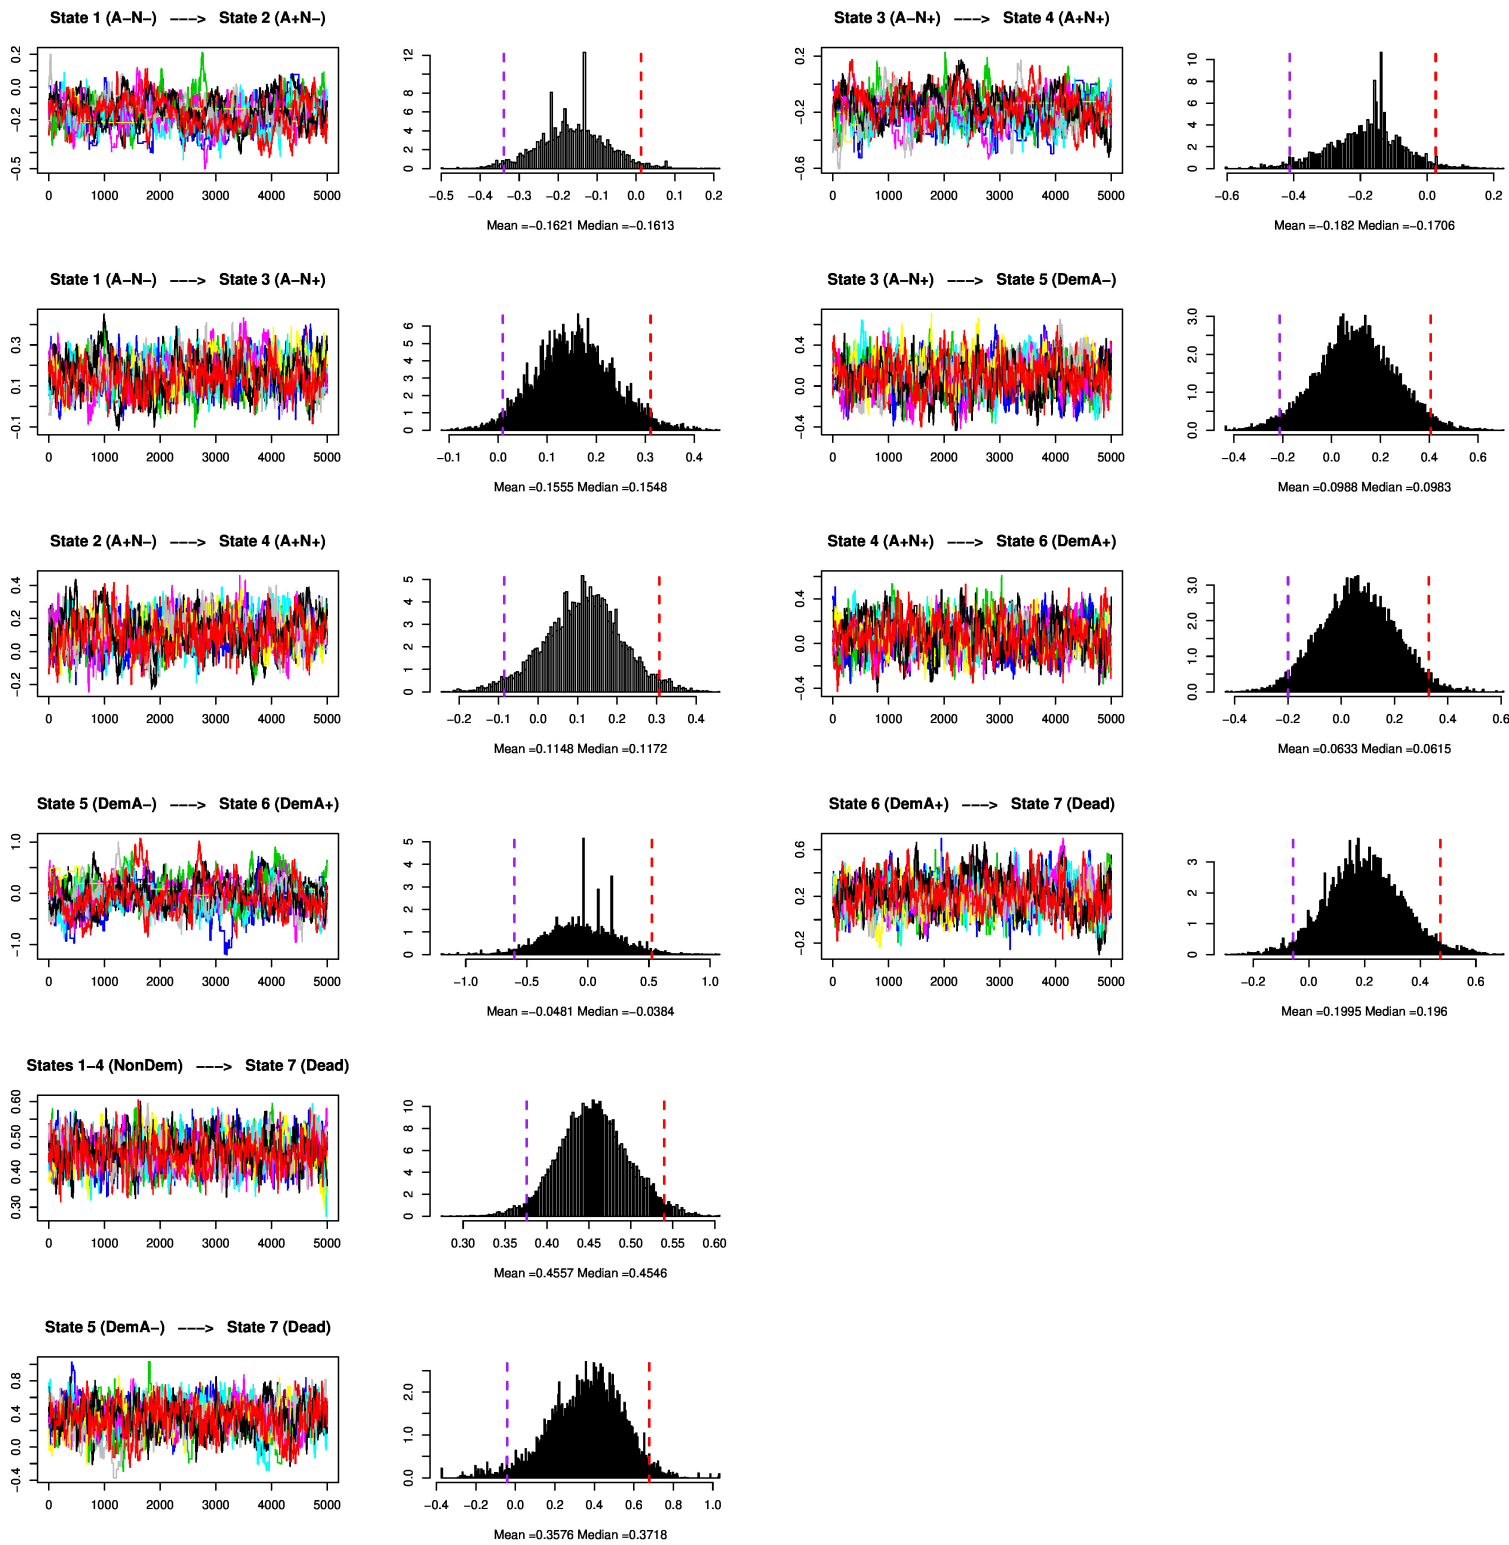

# Sensitivity test of real MCSA data: log-rate educ parameters

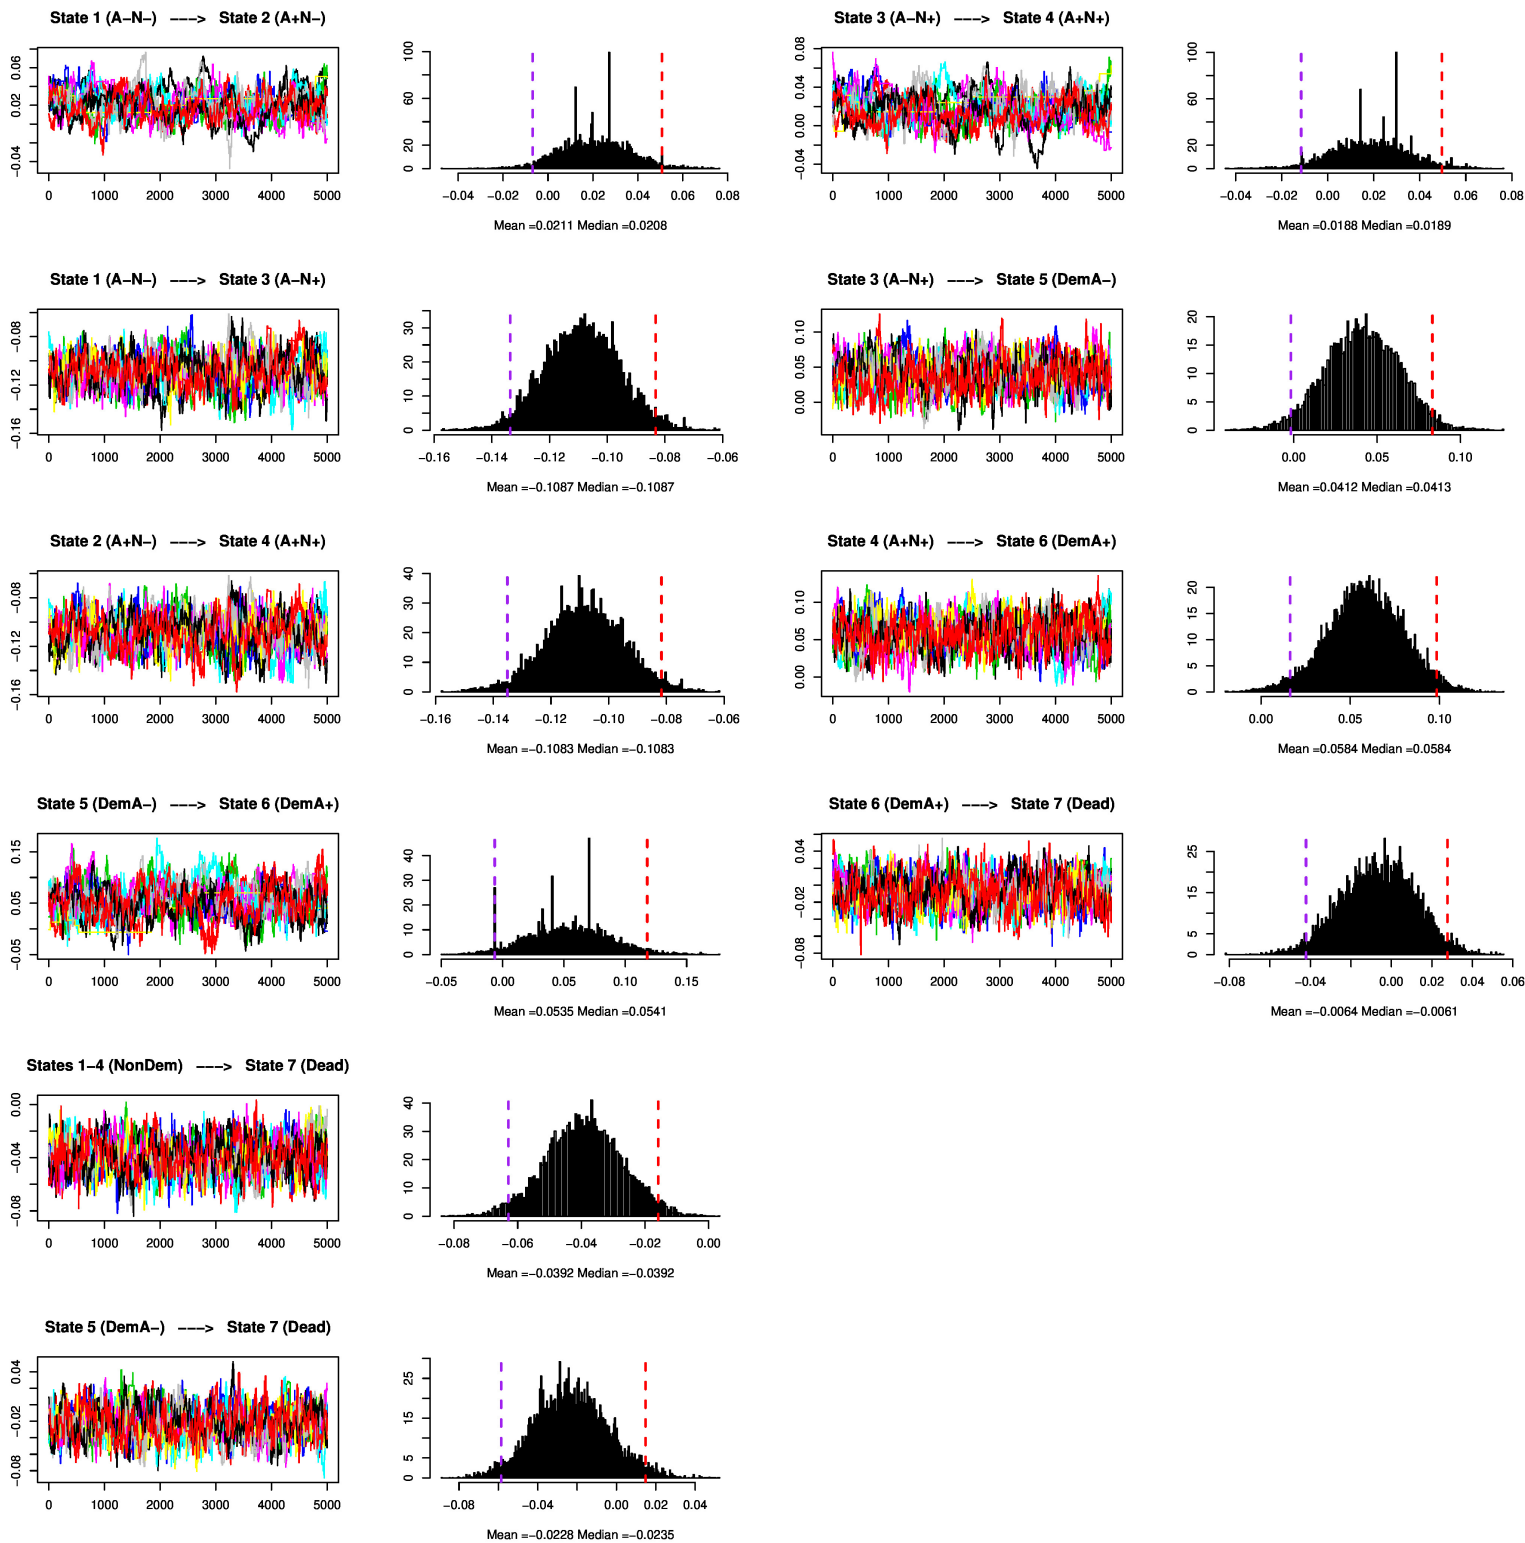

# Sensitivity test of real MCSA data: log-rate apoe4 parameters

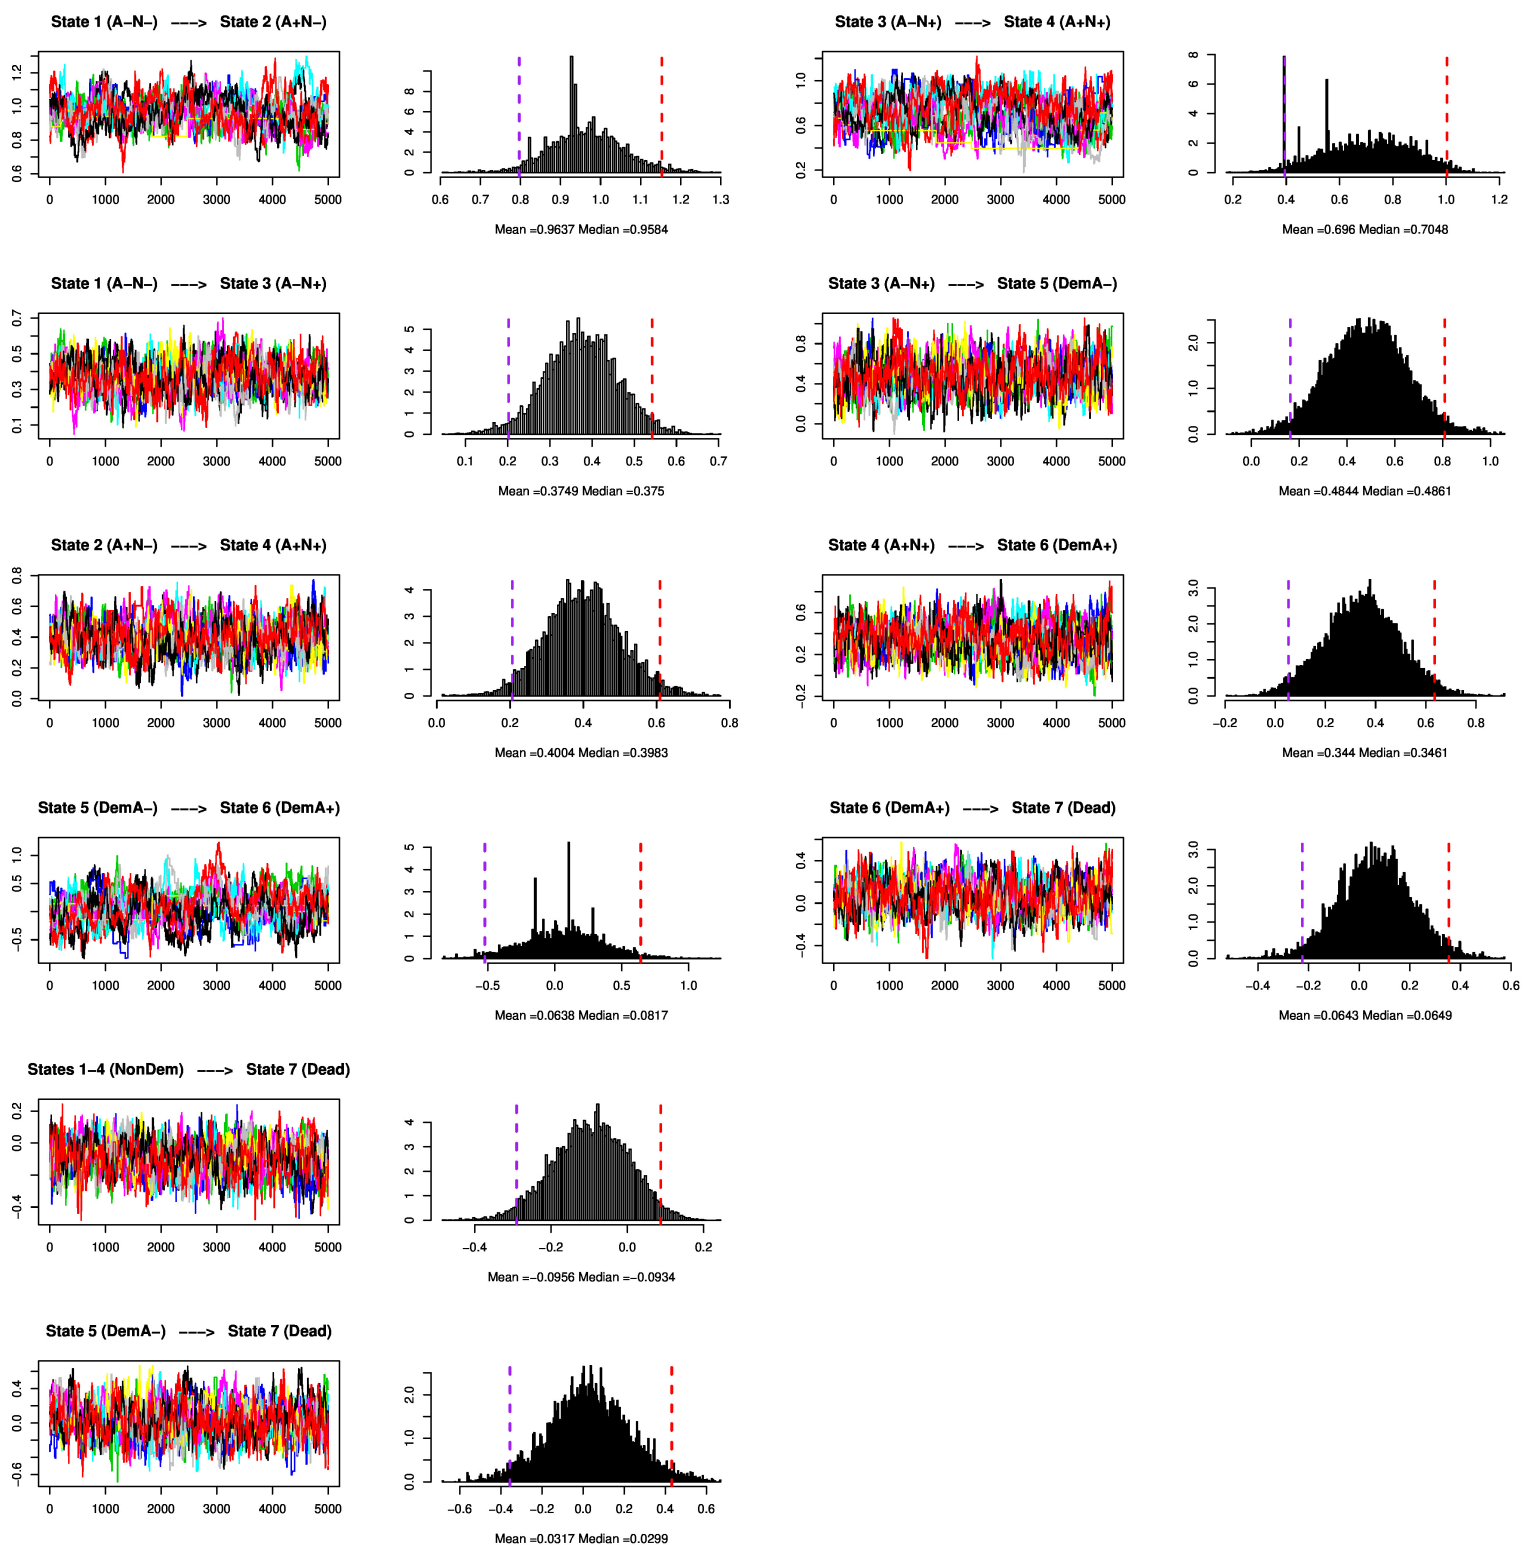

Supplement: Supplementary file 1 [file 3]
