# Supplementary material
Source: publisher figshare collection journal article supplement (https://tandf.figshare.com/articles/dataset/_/7874162)

# Supplementary Material E: Toy CAV data simulation results

## Toy CAV data: misclassification and initial probability parameters

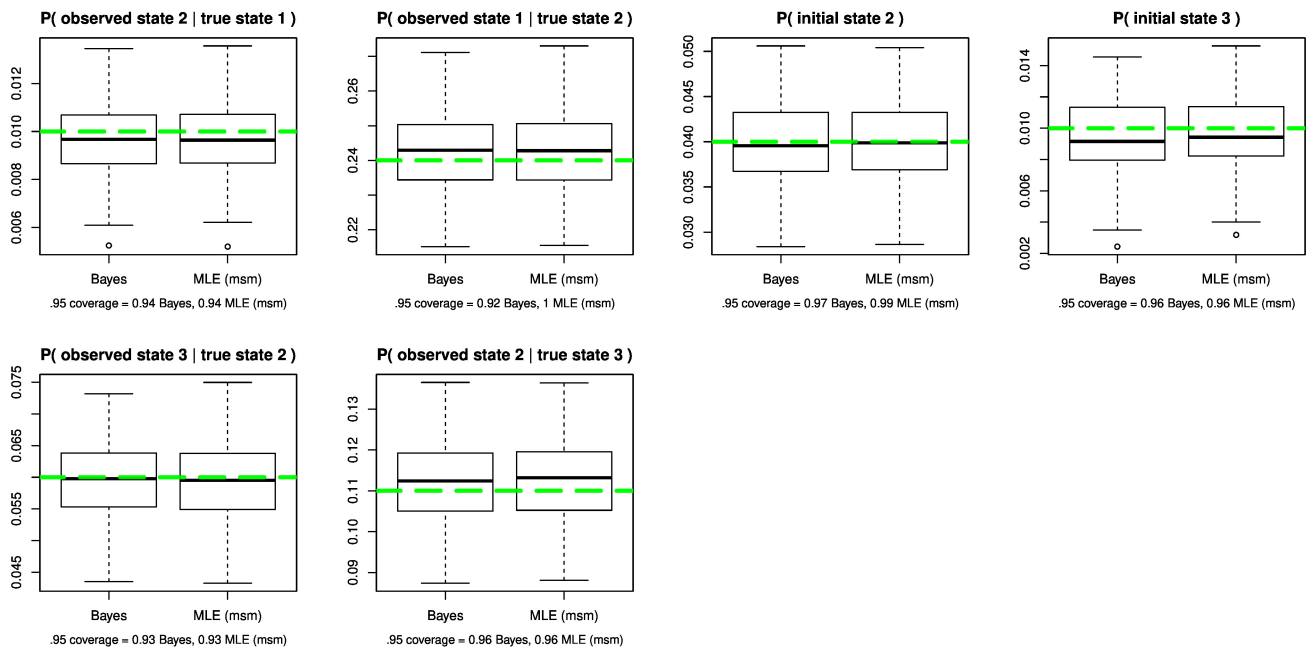

## Toy CAV data *delayed enrollment*: misclassification and initial probability parameters

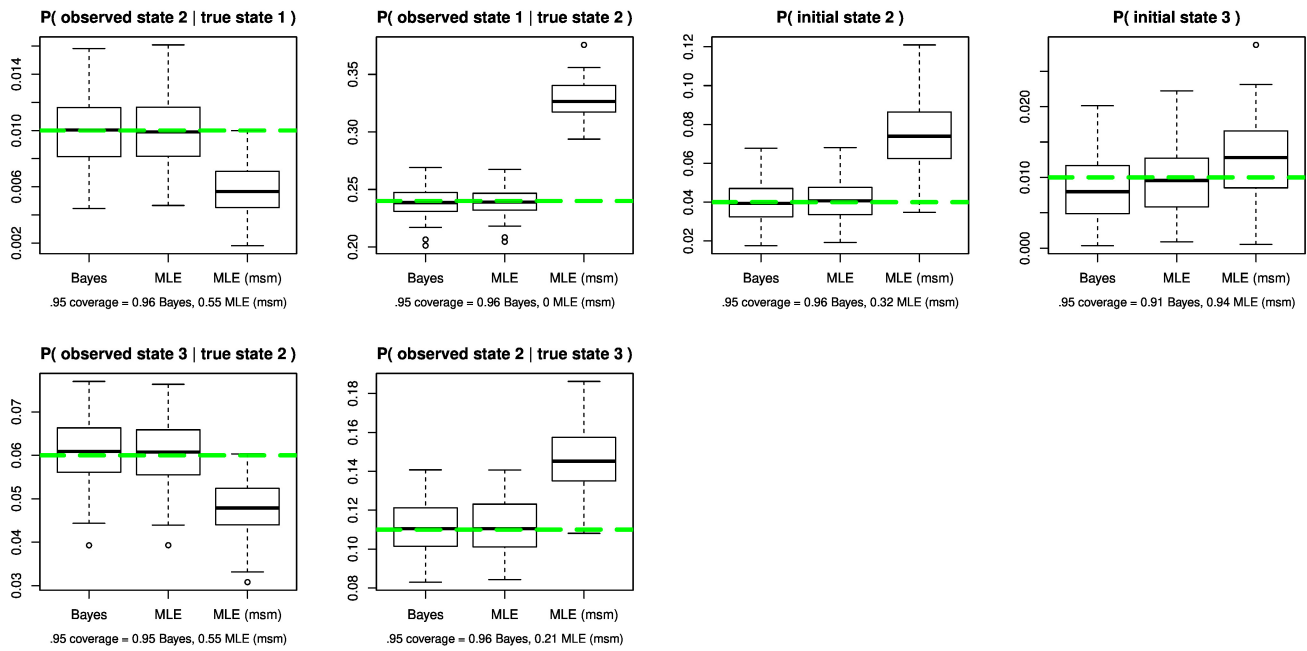

# Toy CAV data: log-rate intercept parameters

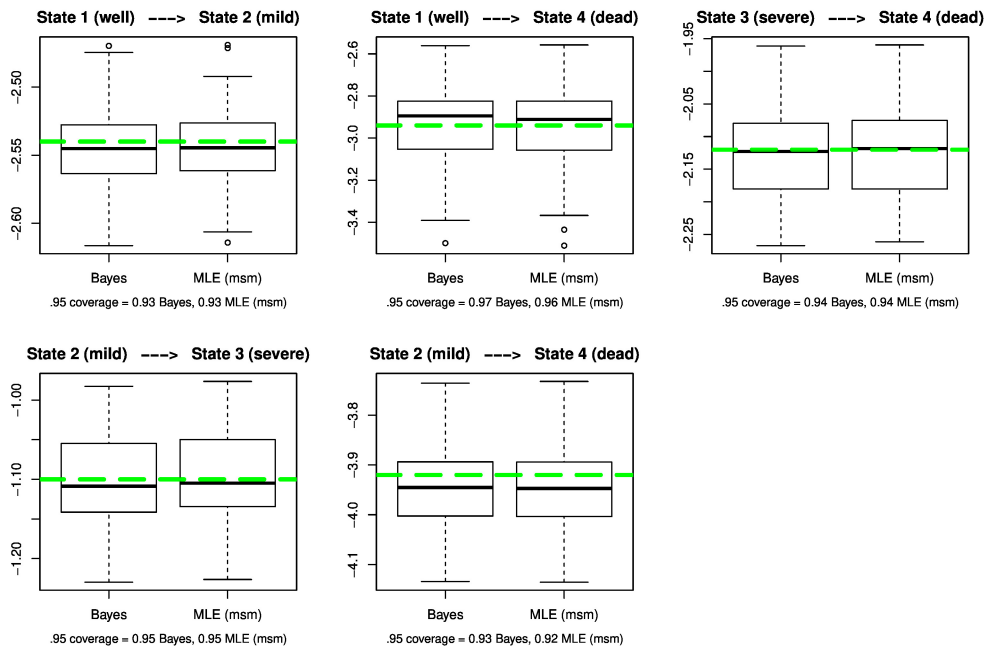

# Toy CAV data *delayed enrollment*: log-rate intercept parameters

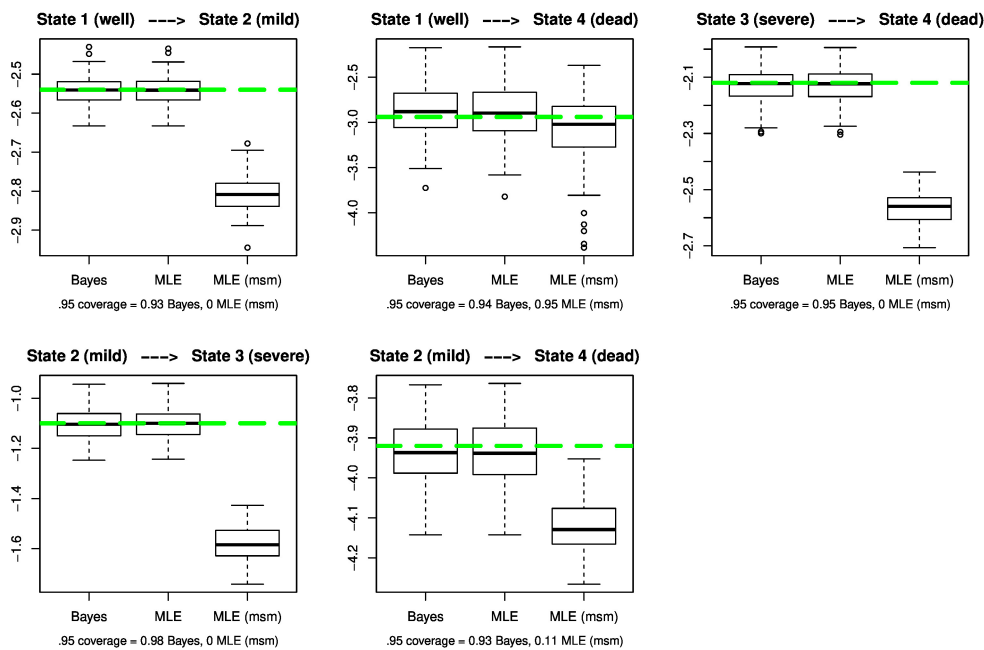

# Toy CAV data: log-rate iyears parameters

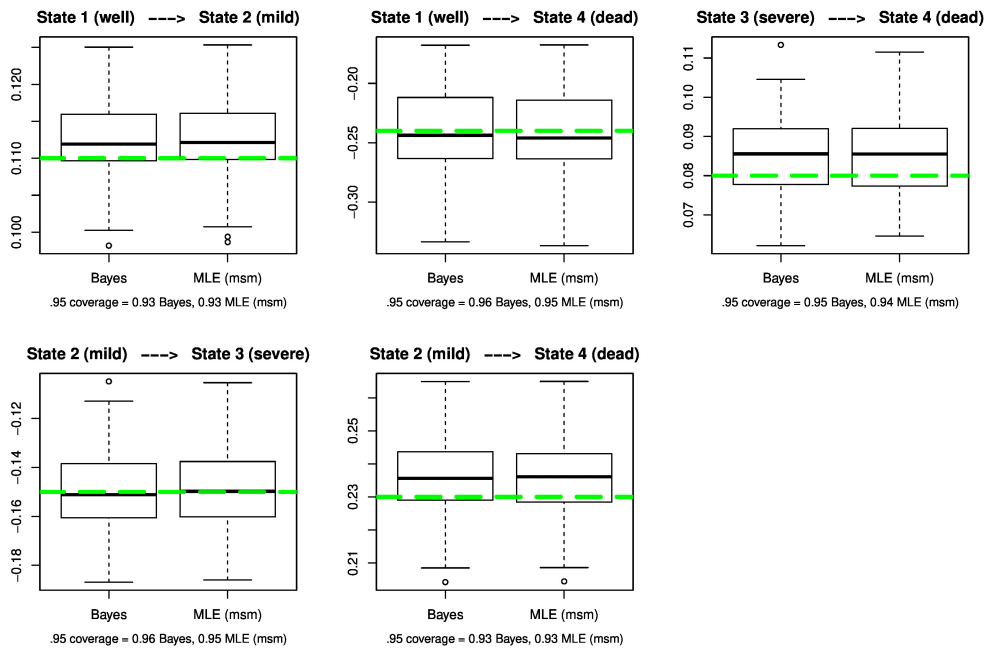

# Toy CAV data *delayed enrollment*: log-rate iyears parameters

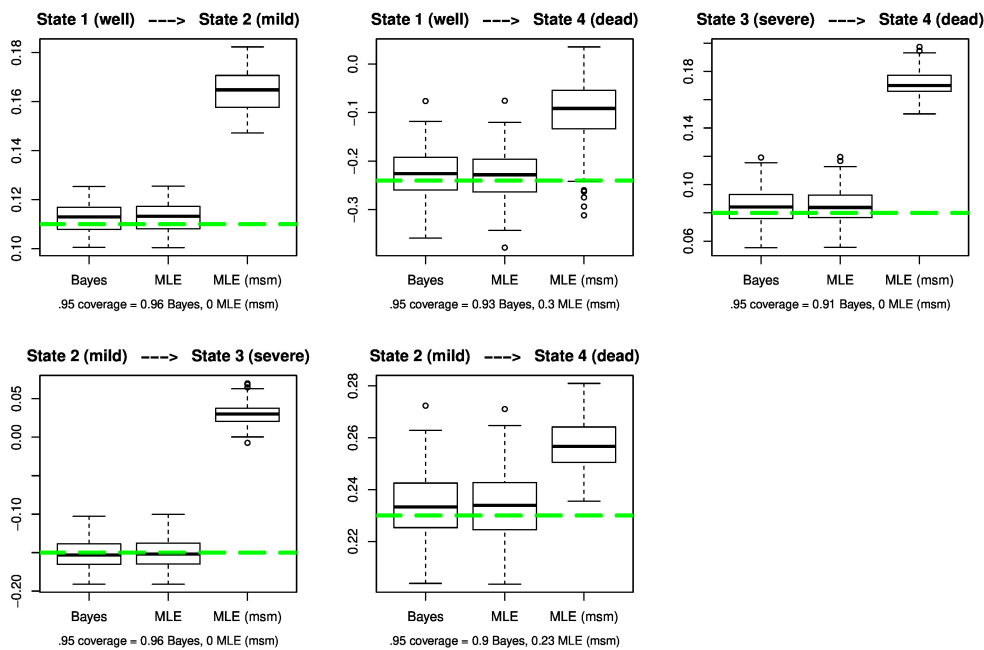

# Toy CAV data: log-rate sex parameters

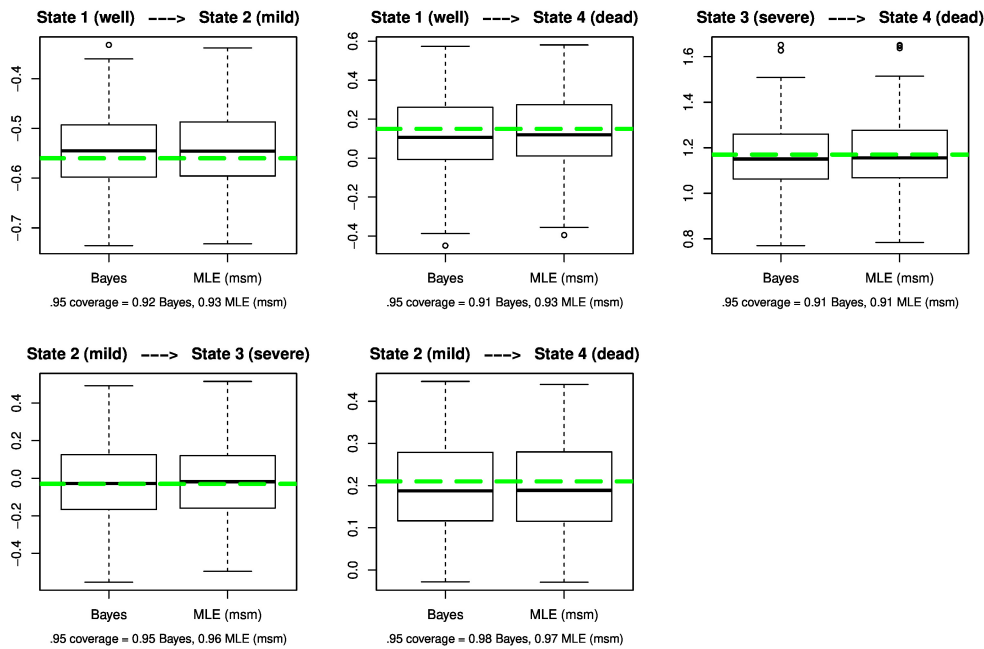

# Toy CAV data *delayed enrollment*: log-rate sex parameters

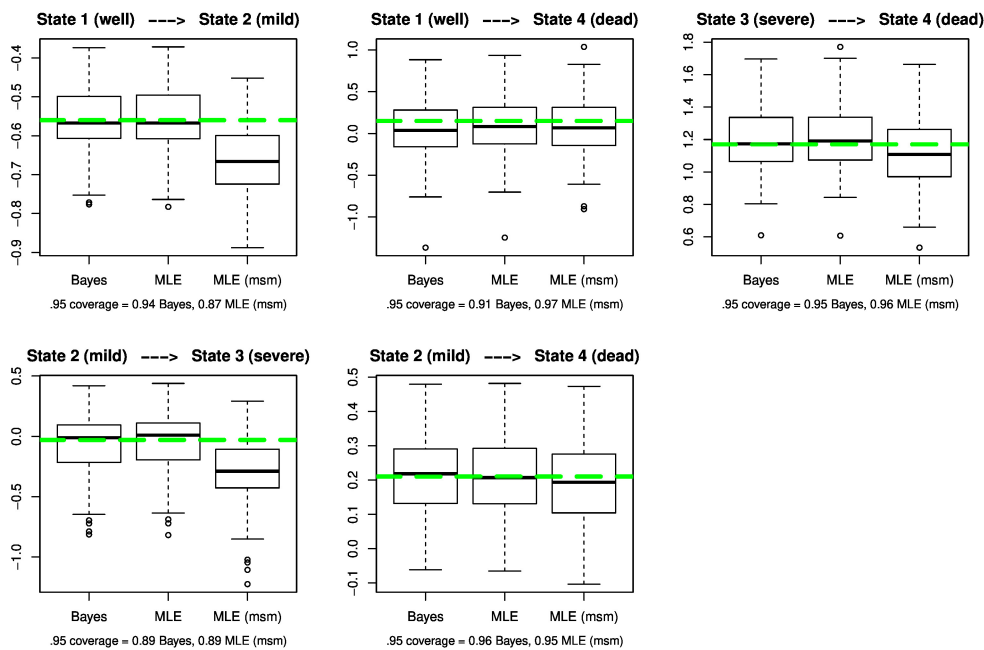

Supplement: Supplementary file 2 [file 3]
