# Supplementary material
Source: publisher figshare collection journal article supplement (https://tandf.figshare.com/articles/dataset/_/7874162)

# Supplementary Material B: Real MCSA data results

## Real MCSA data: MMSE response parameters

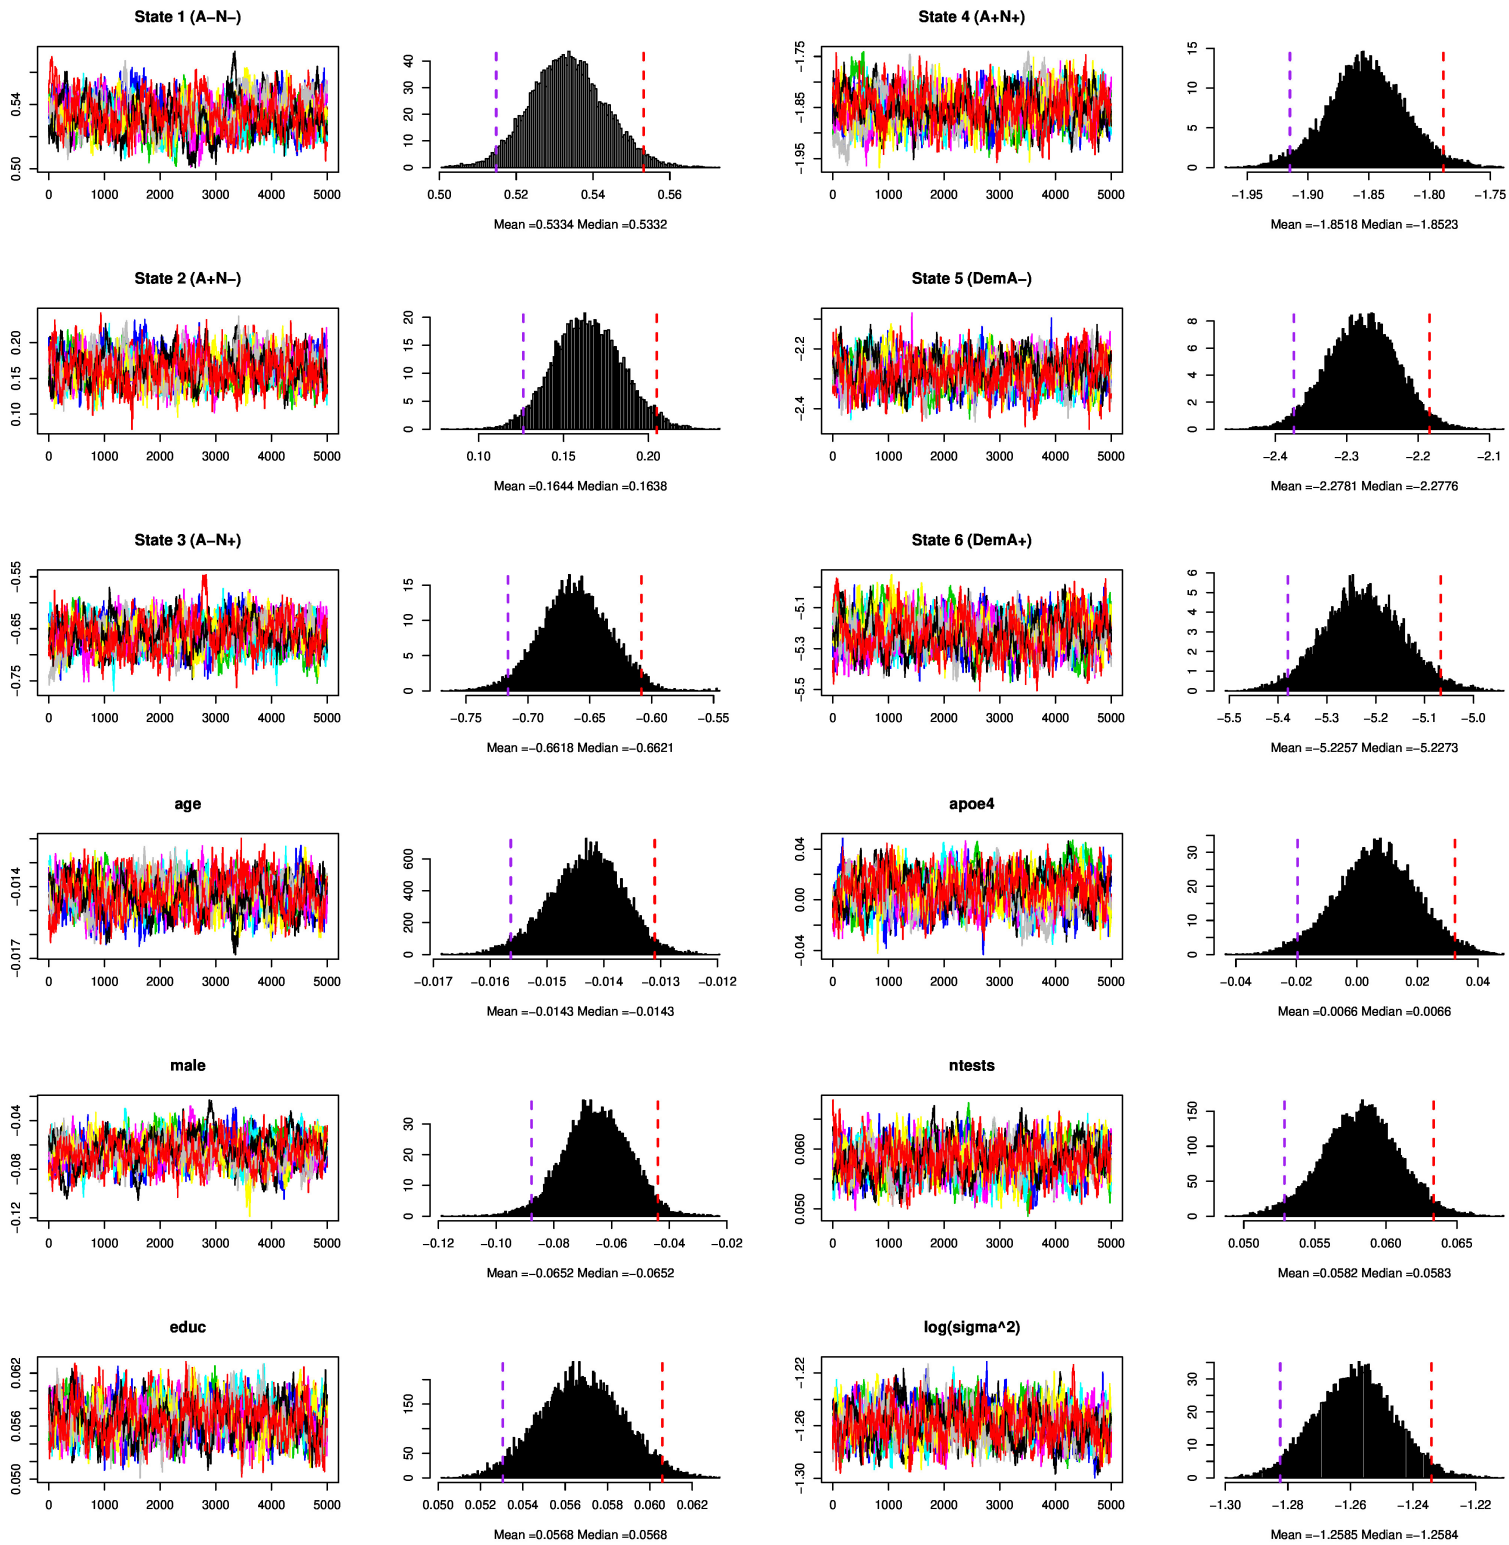

# Real MCSA data: other response parameters, and initial probability parameters

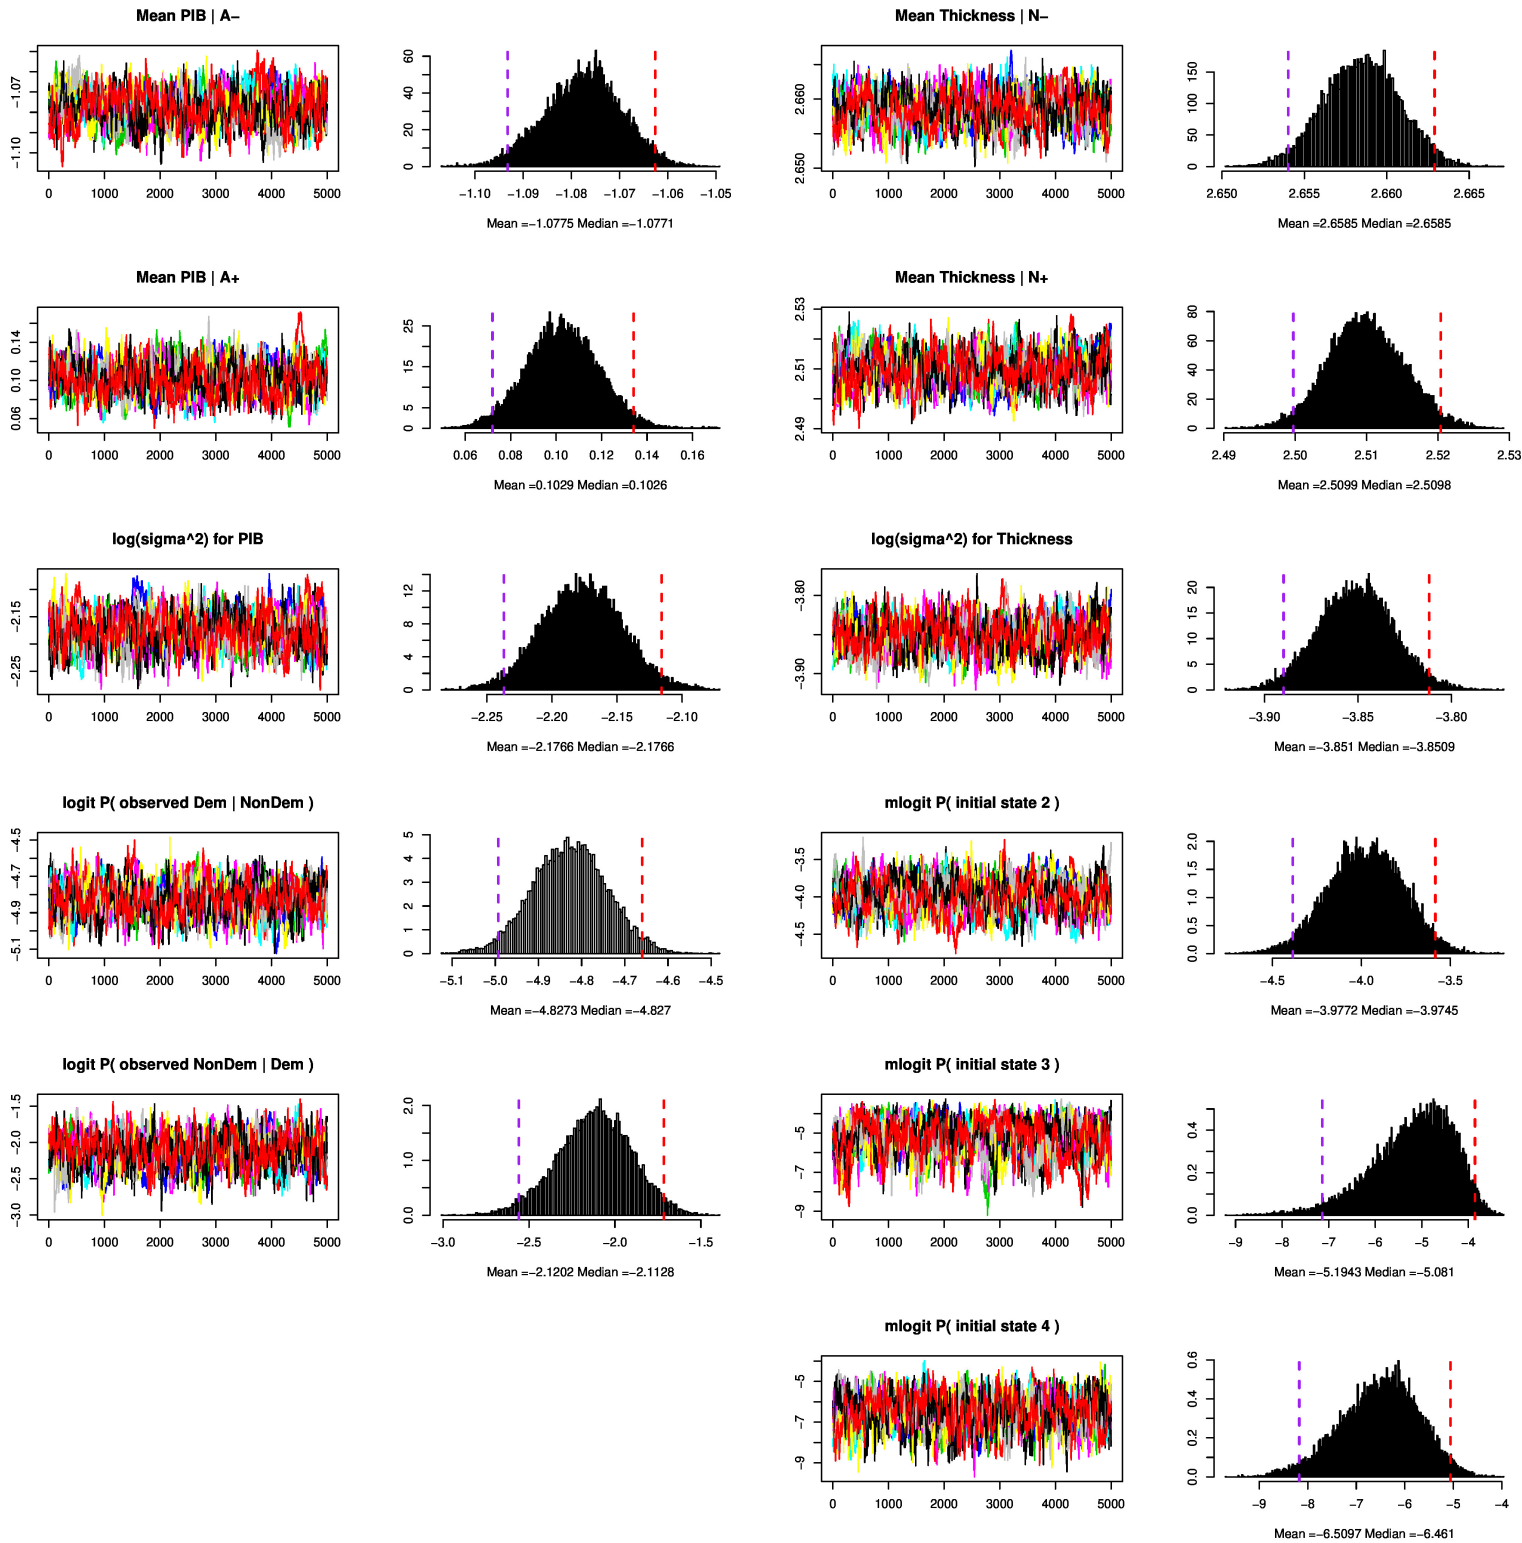

# Real MCSA data: log-rate intercept and death bias parameters

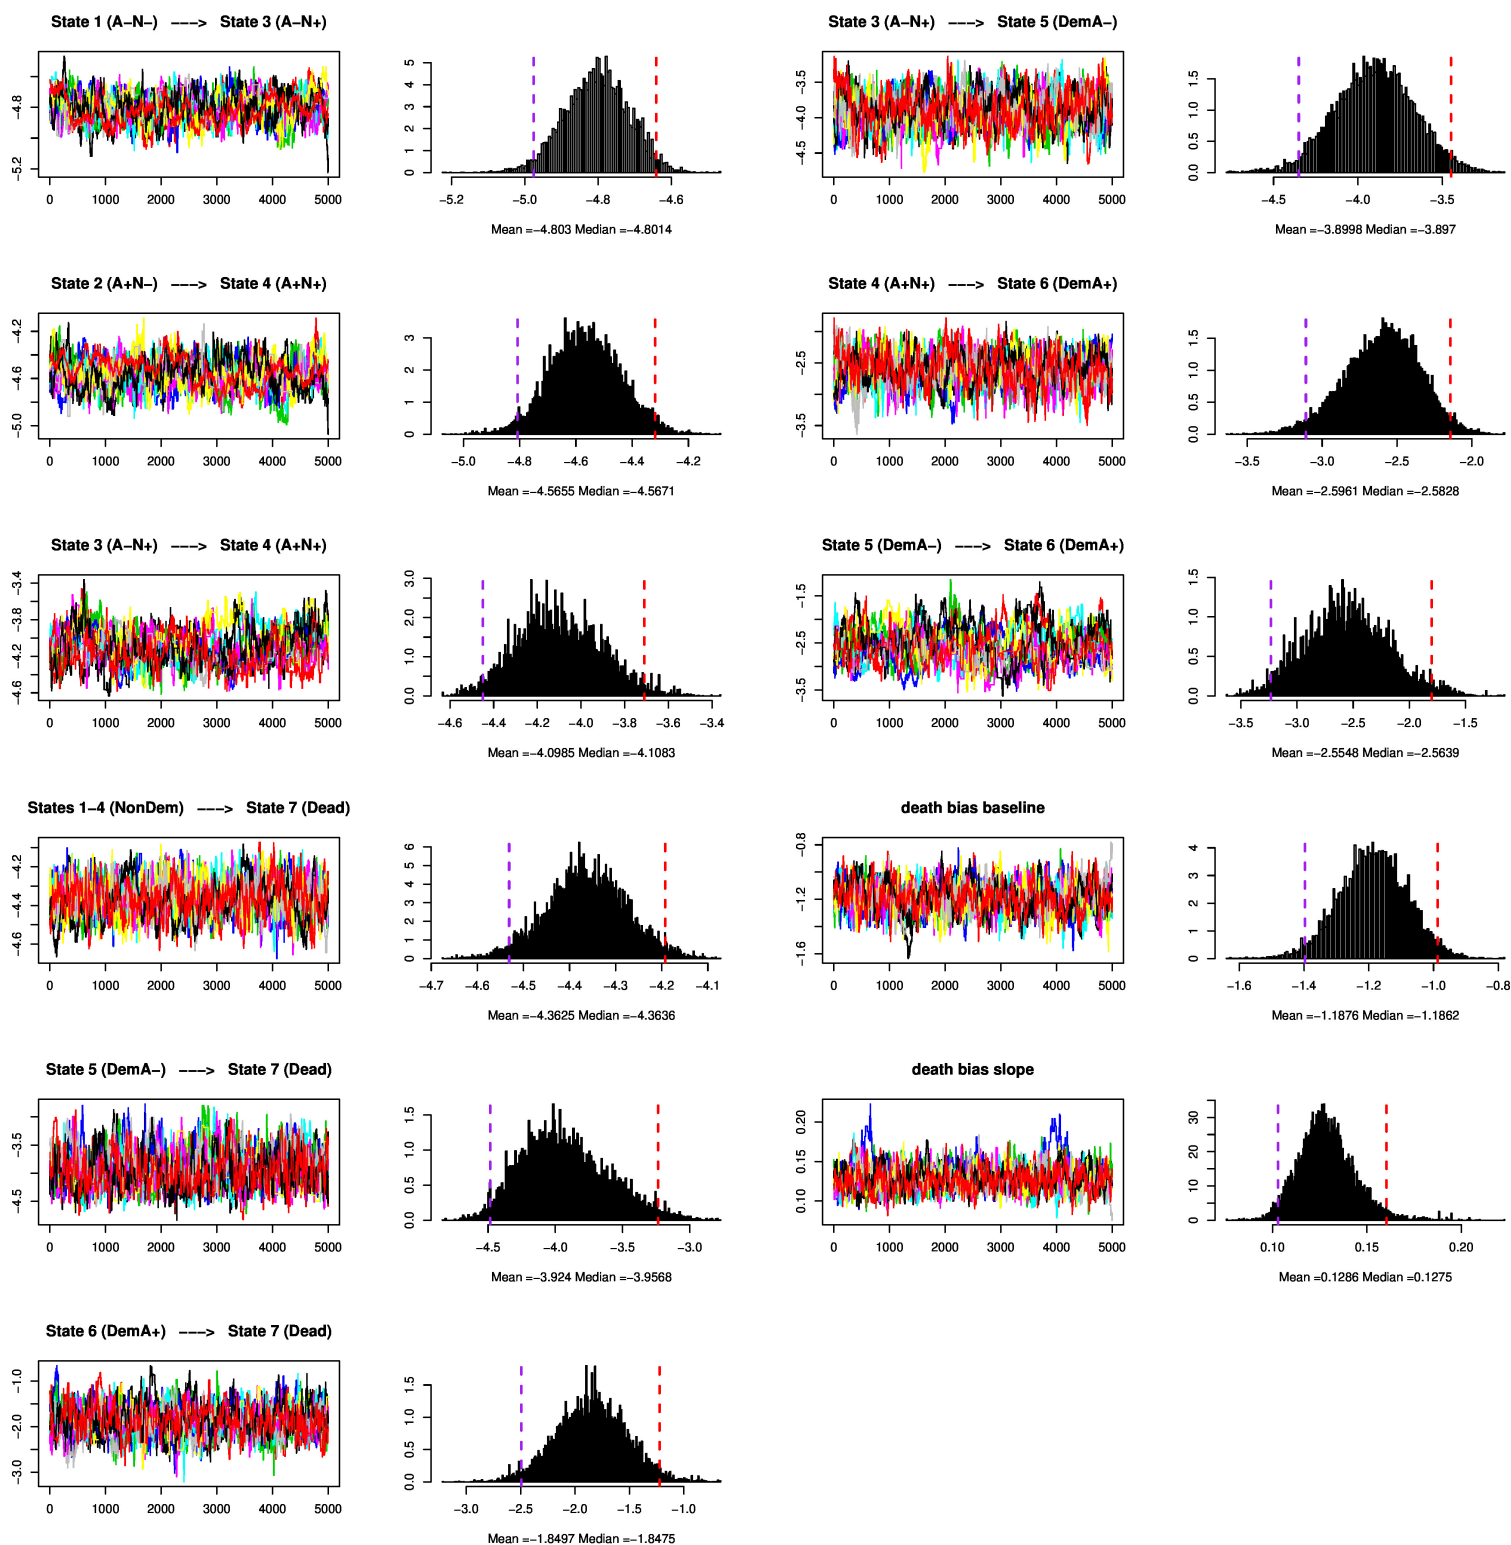

# Real MCSA data: log-rate iage parameters

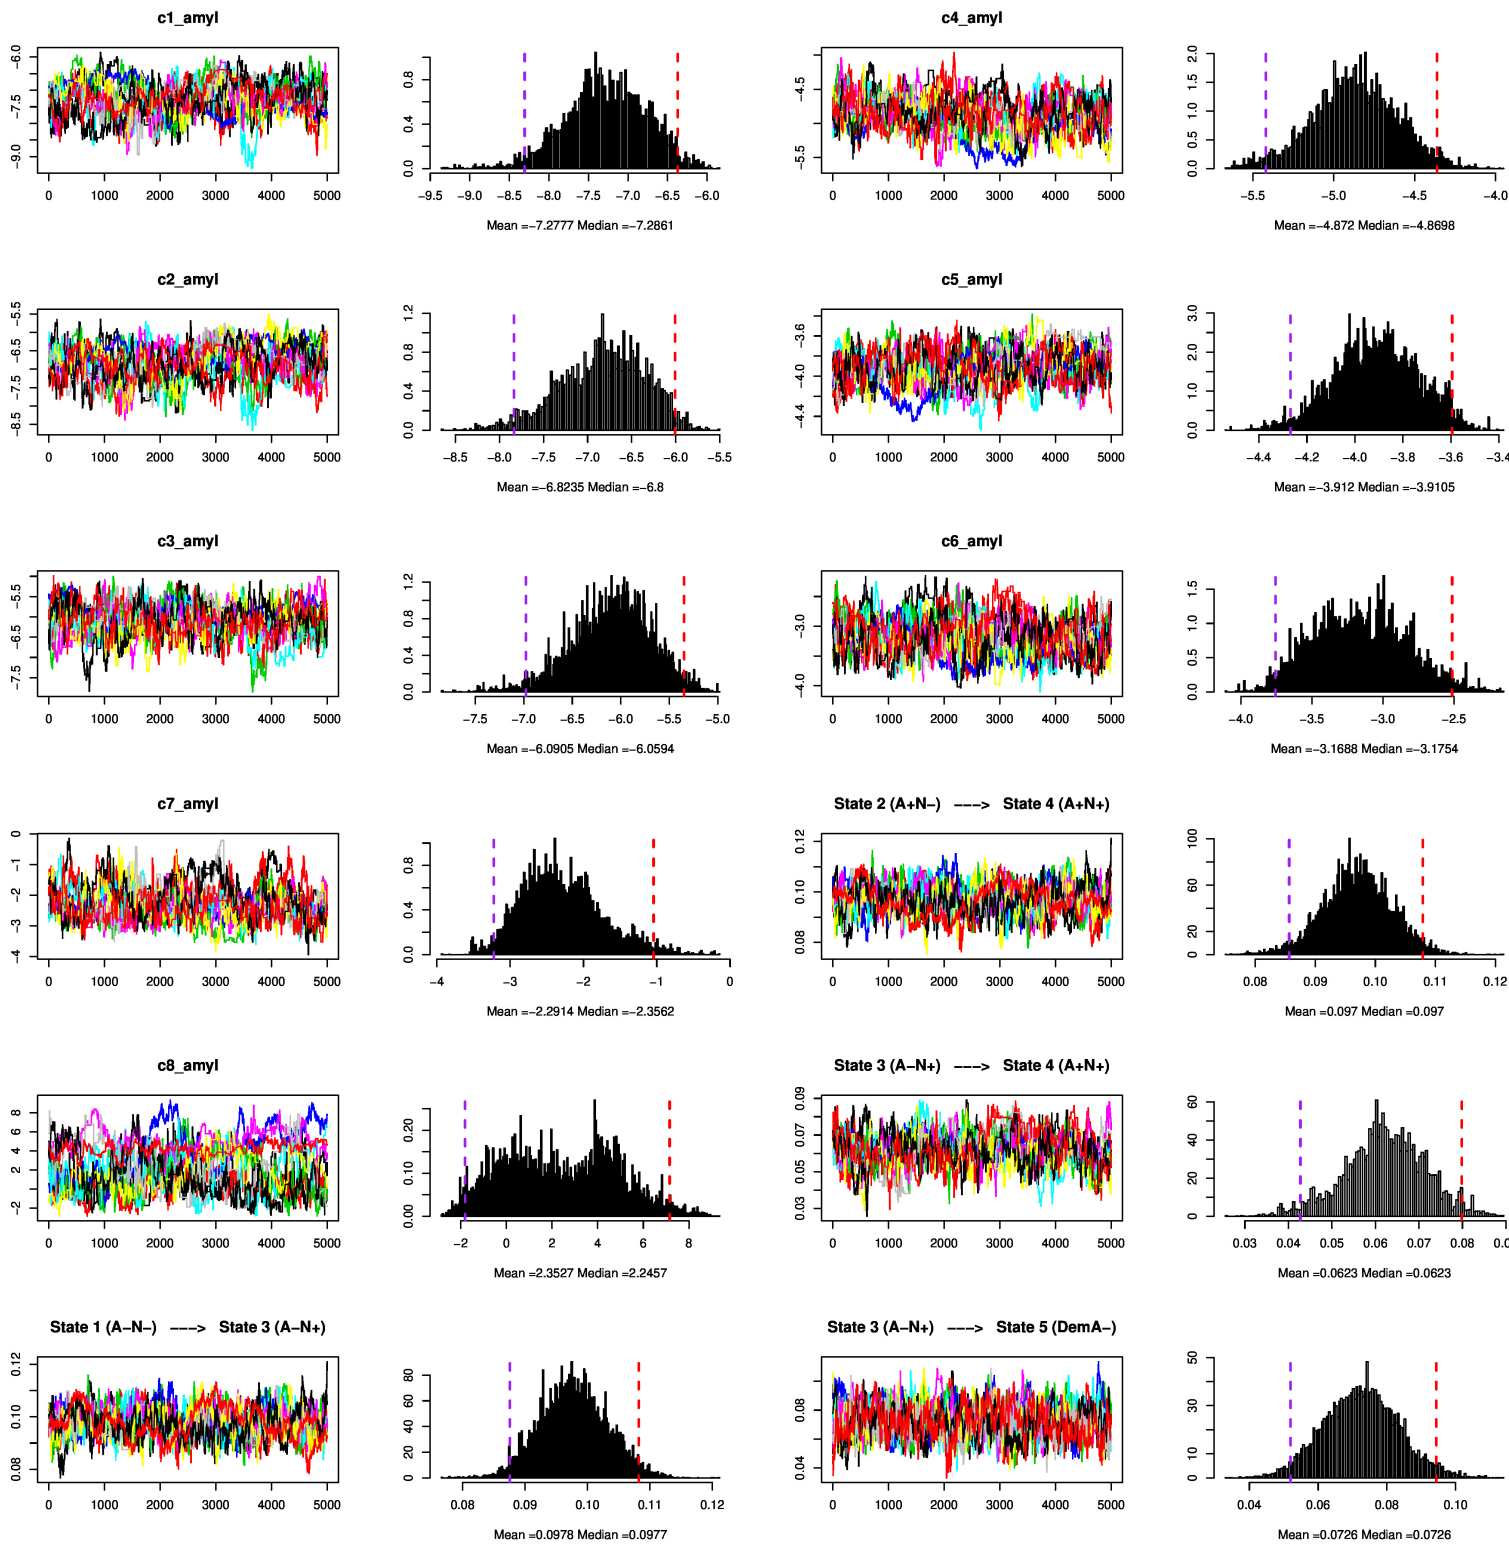



# Real MCSA data: log-rate iage parameters (continued)

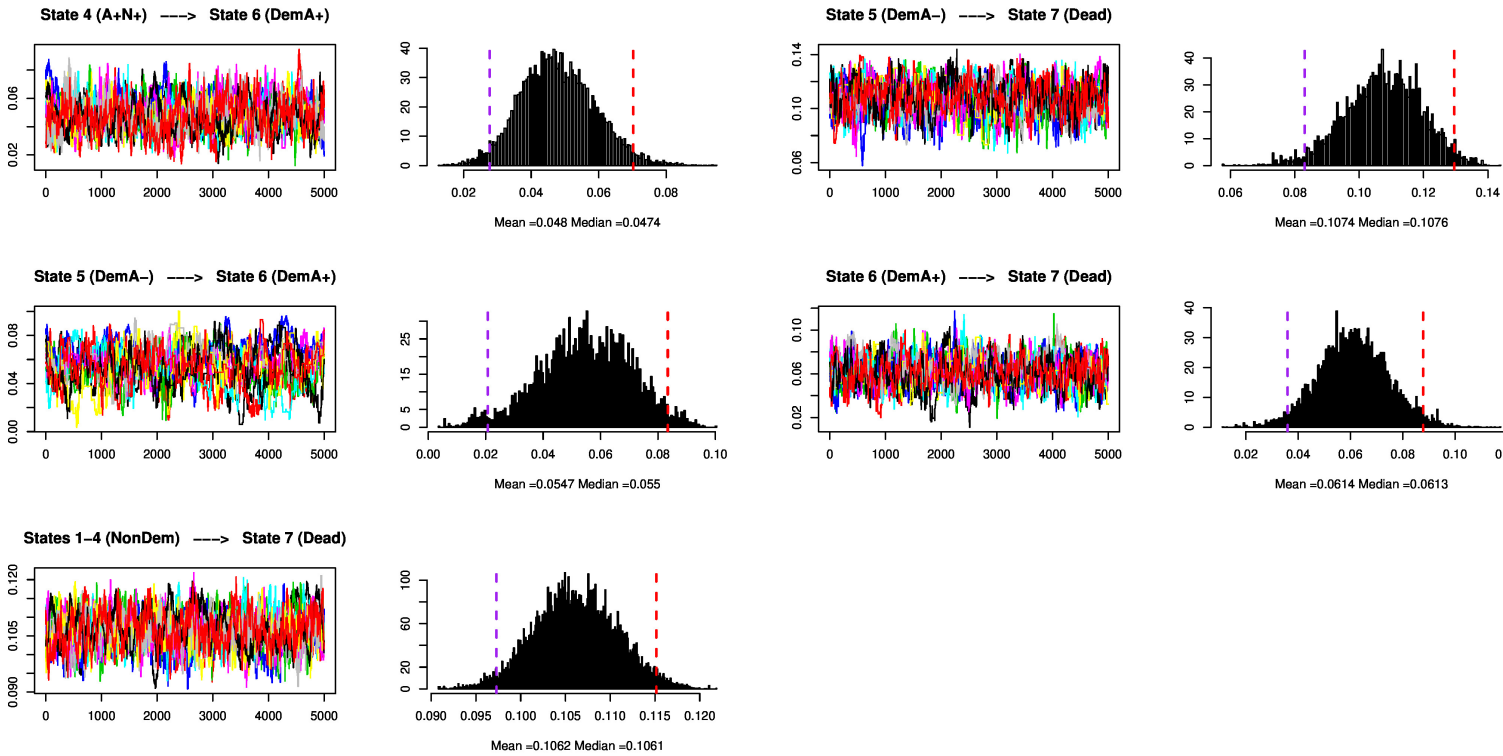

# Real MCSA data: log-rate male parameters

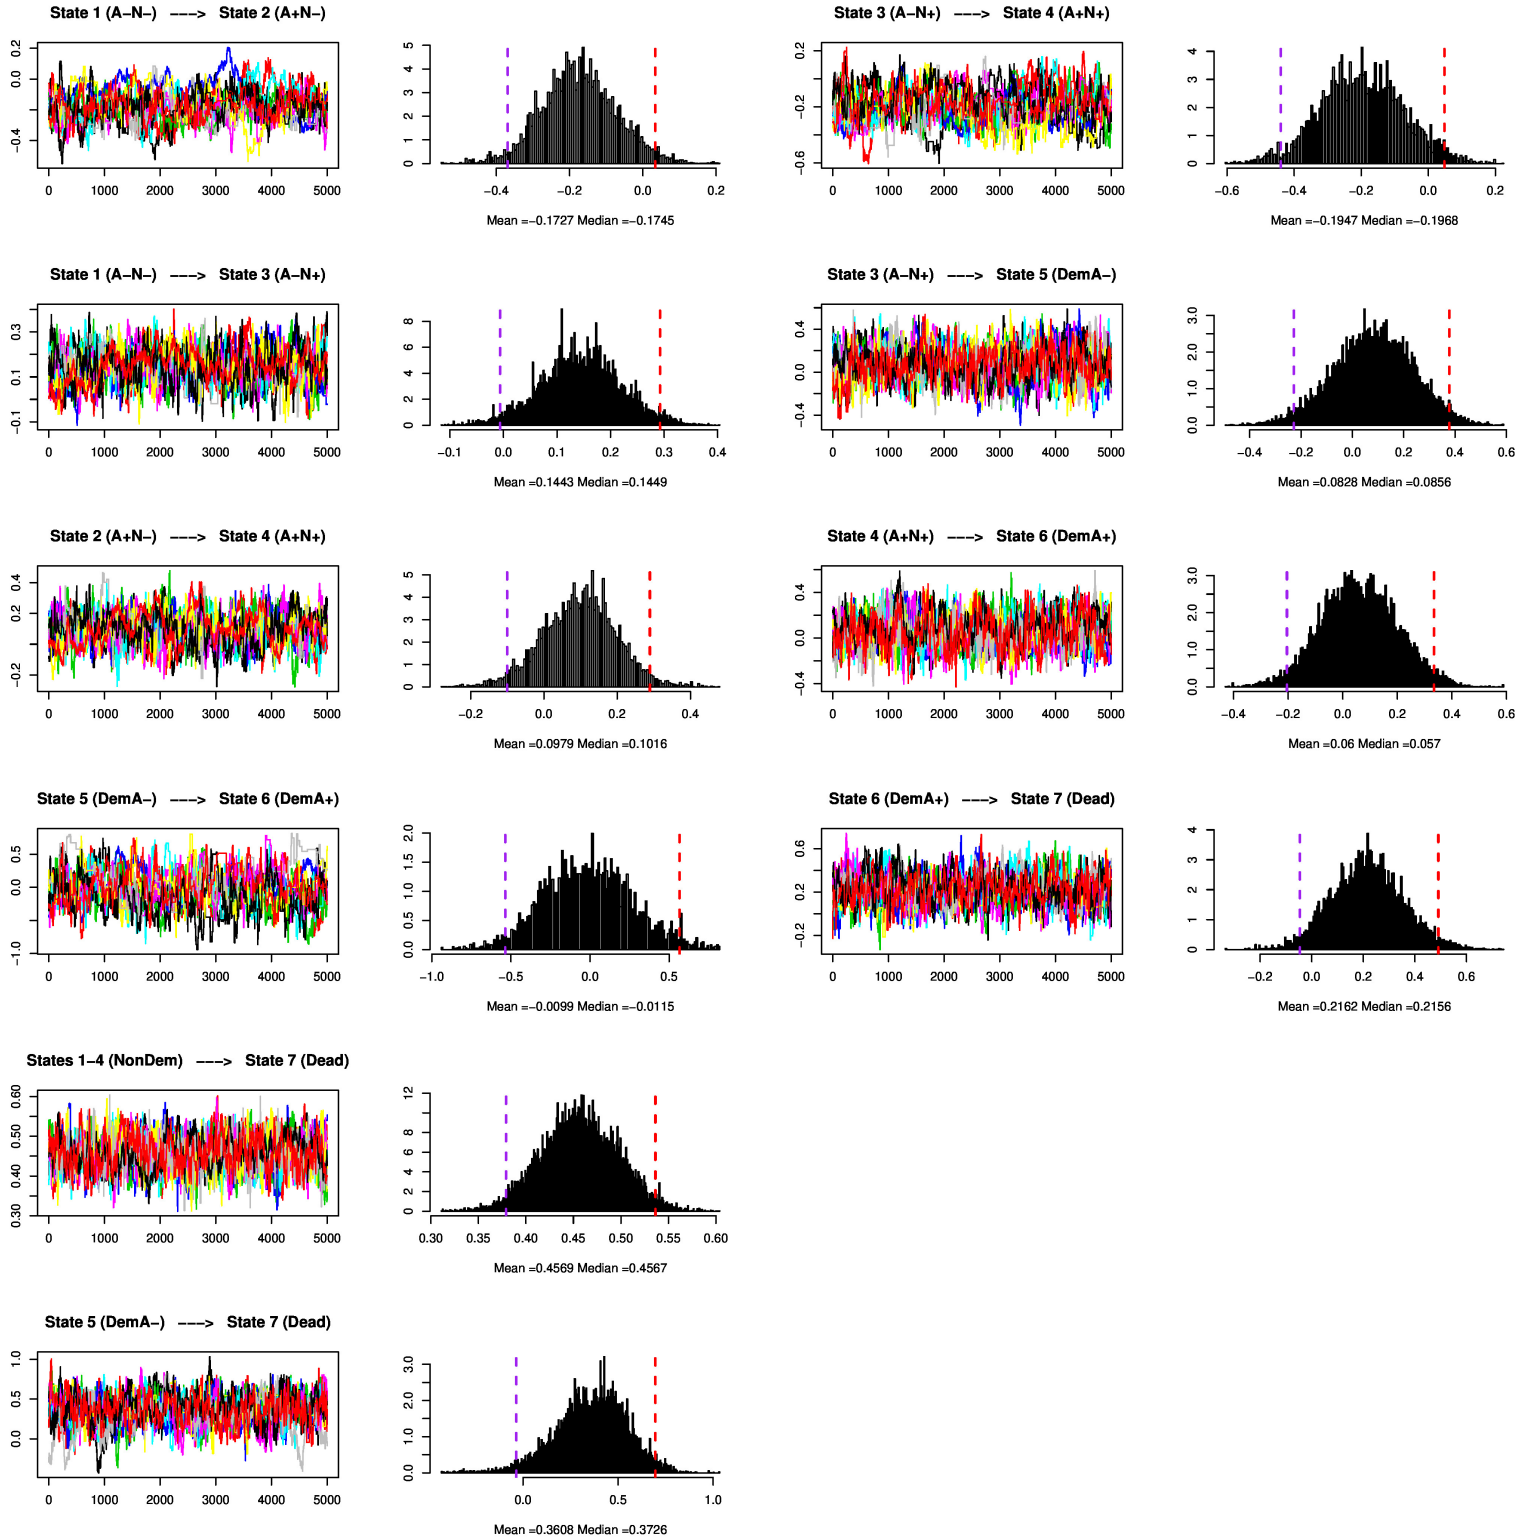

# Real MCSA data: log-rate educ parameters

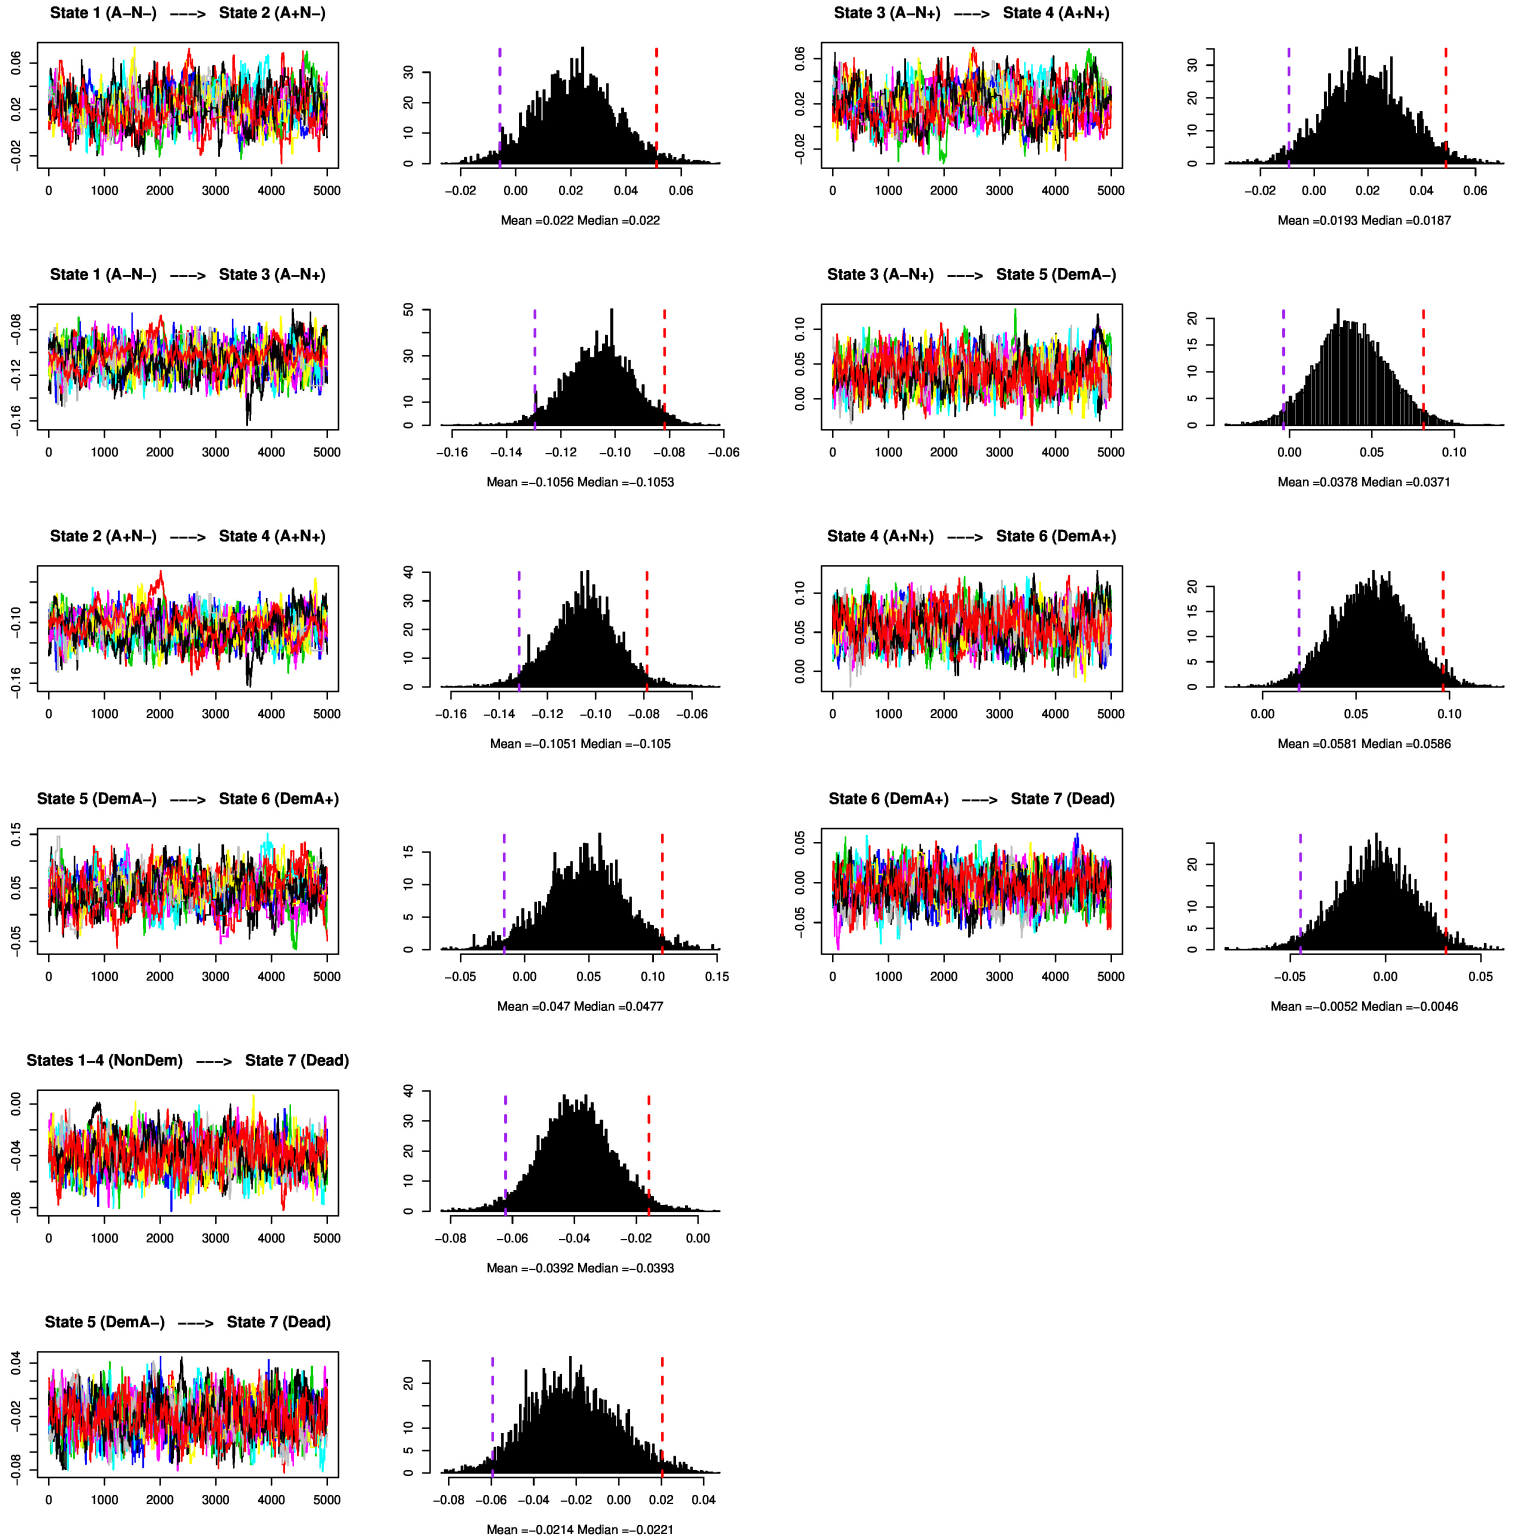

# Real MCSA data: log-rate apoe4 parameters

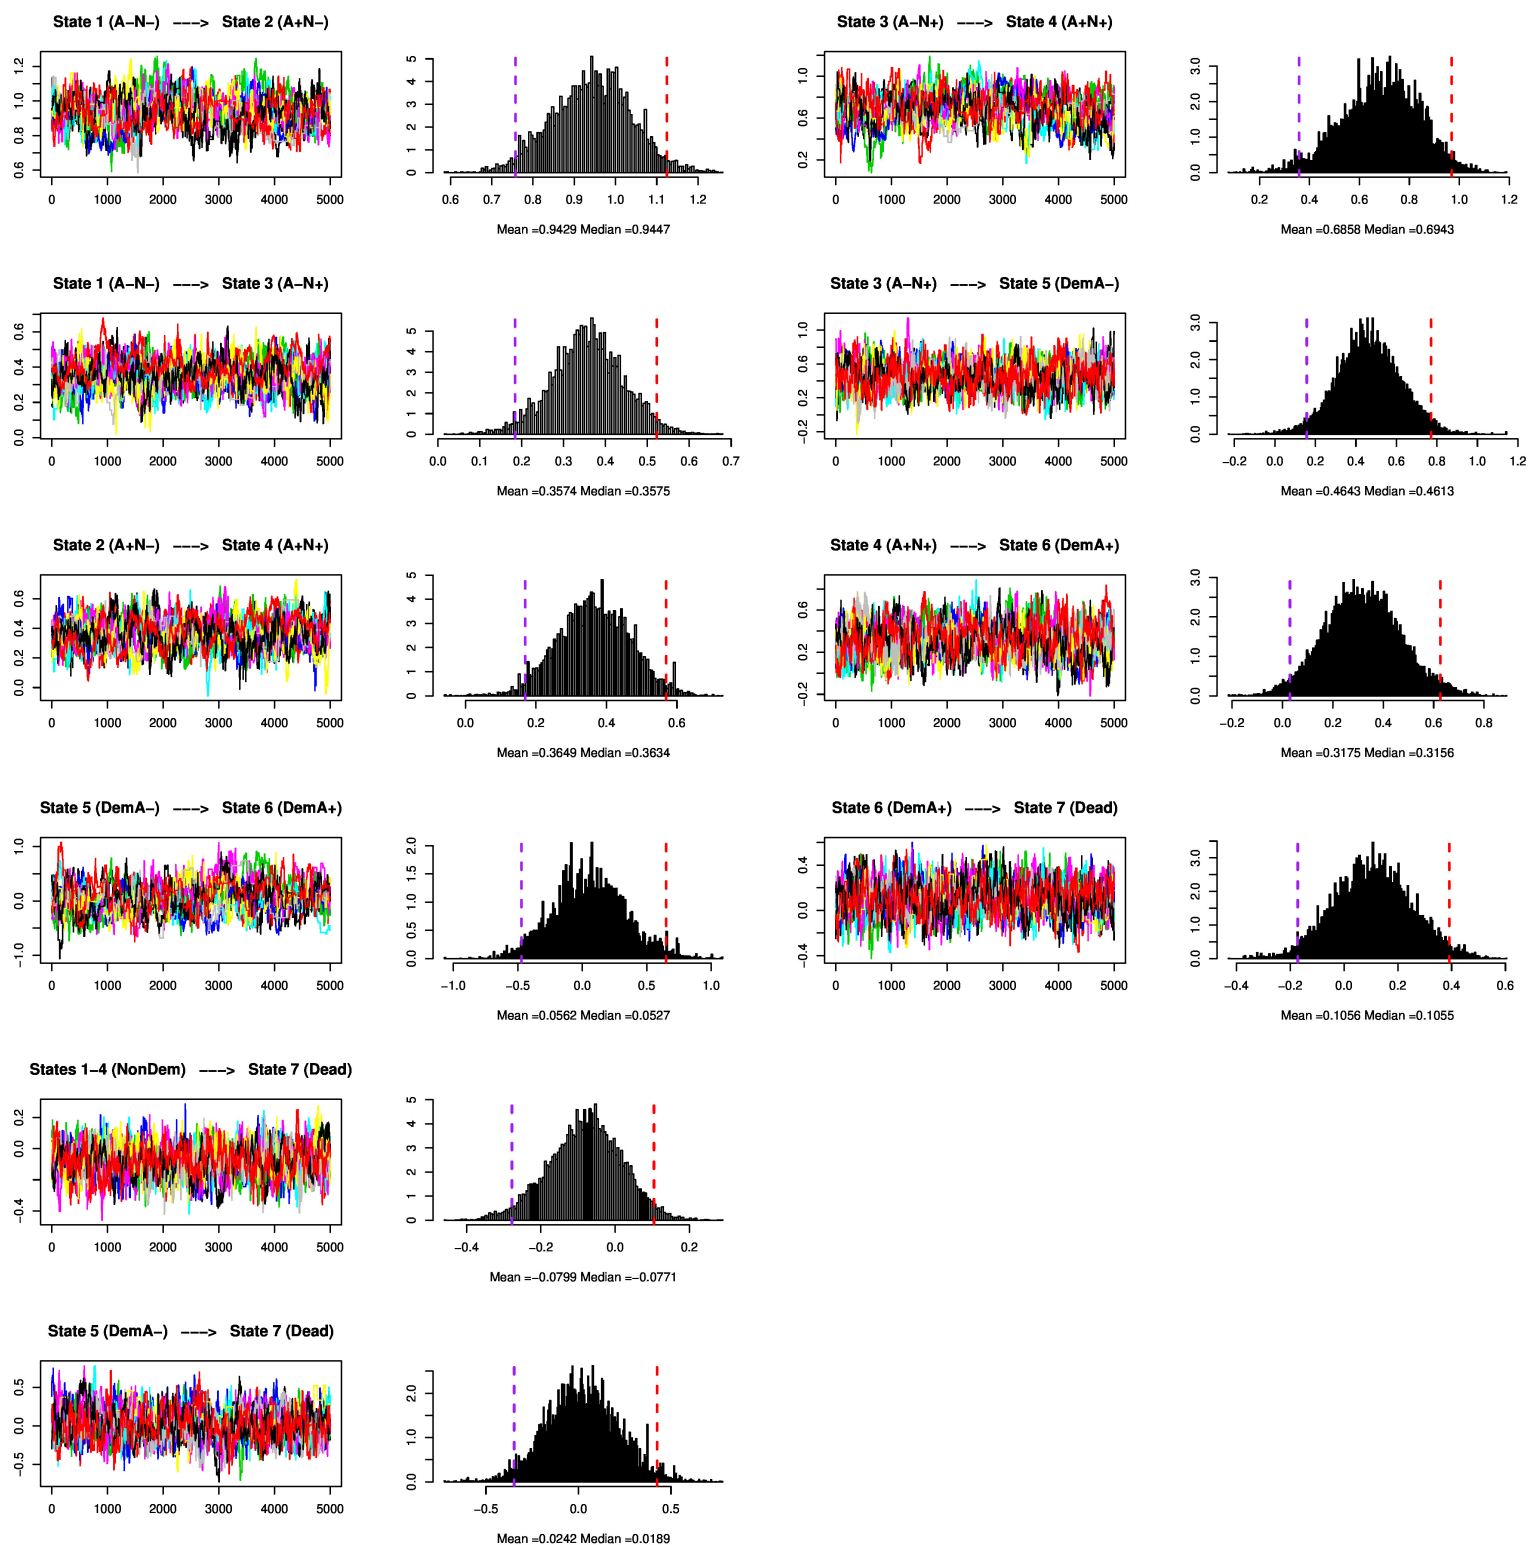

Supplement: Supplementary file 3 [file 3]
